# Supplementary material
Source: PubMed Central journal article supplement (PMC7383229)
Supplement: mmc1.pdf [file mmc1.pdf]

## Supplemental Information

### Ultra-High-Throughput Clinical Proteomics

#### Reveals Classifiers of COVID-19 Infection

**Christoph B. Messner, Vadim Demichev, Daniel Wendisch, Laura Michalick, Matthew White, Anja Freiwald, Kathrin Textoris-Taube, Spyros I. Vernardis, Anna-Sophia Egger, Marco Kreidl, Daniela Ludwig, Christiane Kilian, Federica Agostini, Aleksej Zelezniak, Charlotte Thibeault, Moritz Pfeiffer, Stefan Hippenstiel, Andreas Hocke, Christof von Kalle, Archie Campbell, Caroline Hayward, David J. Porteous, Riccardo E. Marioni, Claudia Langenberg, Kathryn S. Lilley, Wolfgang M. Kuebler, Michael Mülleler, Christian Drosten, Norbert Suttorp, Martin Witzenrath, Florian Kurth, Leif Erik Sander, and Markus Ralser**

Table S1. Scoring of exploratory and validation COVID-19 cohorts.

| Exploratory Cohort |           |              |                               |     |     |                    |
|--------------------|-----------|--------------|-------------------------------|-----|-----|--------------------|
| Patient            | WHO score | WHO category | Clinical assessment (Charité) | Age | Sex | Outcome            |
| 1                  | 3         | mild         | mild                          | 21  | m   | discharged         |
| 2                  | 3         | mild         | mild                          | 31  | f   | discharged         |
| 3                  | 3         | mild         | mild                          | 45  | m   | discharged         |
| 10                 | 3         | mild         | mild                          | 50  | f   | discharged         |
| 18                 | 3         | mild         | mild                          | 60  | f   | discharged         |
| 19                 | 3         | mild         | mild                          | 52  | m   | discharged         |
| 23                 | 3         | mild         | mild                          | 44  | f   | discharged         |
| 27                 | 3         | mild         | mild                          | 40  | f   | discharged         |
| 28                 | 3         | mild         | mild                          | 64  | m   | discharged         |
| 34                 | 3         | mild         | mild                          | 47  | m   | discharged         |
| 35                 | 3         | mild         | mild                          | 37  | f   | discharged         |
| 37                 | 3         | mild         | mild                          | 78  | m   | discharged         |
| 4*                 |           |              | severe*                       | 37  | m   |                    |
| 6                  | 3         | mild         | severe                        | 24  | m   | discharged         |
| 5                  | 4         | mild         | severe                        | 71  | m   | discharged         |
| 7                  | 4         | mild         | severe                        | 32  | m   | discharged         |
| 24                 | 4         | mild         | severe                        | 64  | m   | discharged         |
| 29                 | 4         | mild         | severe                        | 53  | m   | discharged         |
| 11                 | 5         | severe       | severe                        | 61  | m   | discharged         |
| 16                 | 5         | severe       | severe                        | 78  | m   | still hospitalized |
| 22                 | 5         | severe       | severe                        | 62  | m   | discharged         |
| 26                 | 5         | severe       | severe                        | 56  | f   | discharged         |
| 12                 | 6         | severe       | critical                      | 75  | m   | discharged         |
| 20                 | 6         | severe       | critical                      | 54  | f   | discharged         |
| 21                 | 6         | severe       | critical                      | 52  | m   | discharged         |
| 8                  | 7         | severe       | critical                      | 63  | m   | still hospitalized |
| 9                  | 7         | severe       | critical                      | 80  | f   | still hospitalized |
| 13                 | 7         | severe       | critical                      | 71  | m   | death              |
| 14                 | 7         | severe       | critical                      | 81  | m   | death              |
| 15                 | 7         | severe       | critical                      | 54  | m   | death              |
| 25                 | 7         | severe       | critical                      | 62  | f   | still hospitalized |
| 32                 | 7         | severe       | critical                      | 50  | f   | death              |

| Validation Cohort      |           |                 |                      |     |     |                    |
|------------------------|-----------|-----------------|----------------------|-----|-----|--------------------|
| Individual/<br>Patient | WHO score | WHO<br>category | Clinical<br>category | Age | Sex | Outcome            |
| HD-1                   | 0         | uninfected      | healthy              | 27  | f   |                    |
| HD-2                   | 0         | uninfected      | healthy              | 23  | m   |                    |
| HD-3                   | 0         | uninfected      | healthy              | 34  | f   |                    |
| HD-4                   | 0         | uninfected      | healthy              | 31  | f   |                    |
| HD-5                   | 0         | uninfected      | healthy              | 30  | m   |                    |
| HD-6                   | 0         | uninfected      | healthy              | 41  | f   |                    |
| HD-7                   | 0         | uninfected      | healthy              | 24  | f   |                    |
| HD-8                   | 0         | uninfected      | healthy              | 27  | m   |                    |
| HD-9                   | 0         | uninfected      | healthy              | 30  | f   |                    |
| HD-10                  | 0         | uninfected      | healthy              | 34  | f   |                    |
| HD-11                  | 0         | uninfected      | healthy              | 42  | m   |                    |
| HD-12                  | 0         | uninfected      | healthy              | 30  | f   |                    |
| HD-13                  | 0         | uninfected      | healthy              | 33  | f   |                    |
| HD-14                  | 0         | uninfected      | healthy              | 29  | f   |                    |
| HD-15                  | 0         | uninfected      | healthy              | 36  | f   |                    |
| 49                     | 3         | mild            | mild                 | 72  | f   | discharged         |
| 56                     | 3         | mild            | mild                 | 58  | f   | discharged         |
| 65                     | 3         | mild            | mild                 | 22  | m   | discharged         |
| 66                     | 3         | mild            | mild                 | 75  | f   | discharged         |
| 75                     | 3         | mild            | mild                 | 84  | m   | discharged         |
| 38                     | 4         | mild            | severe               | 70  | m   | discharged         |
| 48                     | 4         | mild            | severe               | 48  | m   | discharged         |
| 50                     | 4         | mild            | severe               | 78  | m   | discharged         |
| 63                     | 5         | severe          | severe               | 61  | m   | discharged         |
| 57                     | 6         | severe          | critical             | 55  | f   | discharged         |
| 60                     | 6         | severe          | critical             | 65  | m   | discharged         |
| 62                     | 6         | severe          | critical             | 72  | m   | discharged         |
| 33                     | 7         | severe          | critical             | 35  | f   | Still hospitalized |
| 58                     | 7         | severe          | critical             | 26  | m   | Still hospitalized |
| 59                     | 7         | severe          | critical             | 86  | m   | death              |
| 61                     | 7         | severe          | critical             | 54  | m   | Still hospitalized |
| 64                     | 7         | severe          | critical             | 57  | m   | Still hospitalized |

\*A secondary assessment triggered by blind proteome clustering (Figure S3) revealed an Influenza Type B rather than a COVID-19 infection.

Table S2. WHO scoring for COVID-19 cases used in the study (World Health Organisation 2020).

| Patient state                 | Descriptor                                                                                                                     | Score |
|-------------------------------|--------------------------------------------------------------------------------------------------------------------------------|-------|
| Uninfected                    | No clinical or virological evidence of infection                                                                               | 0     |
| Ambulatory                    | No limitation of activities                                                                                                    | 1     |
|                               | Limitation of activities                                                                                                       | 2     |
| Hospitalised - mild disease   | No oxygen therapy                                                                                                              | 3     |
|                               | Oxygen by mask or nasal prongs                                                                                                 | 4     |
| Hospitalised - severe disease | Non-invasive ventilation or high-flow oxygen                                                                                   | 5     |
|                               | Intubation and mechanical ventilation                                                                                          | 6     |
|                               | Ventilation + additional organ support (pressors, renal replacement therapy (RRT), extracorporeal membrane oxygenation (ECMO)) | 7     |



Table S3. **Proteins differentially expressed depending on COVID-19 severity.**

| Gene symbols       | Names                                 | Possible relevance to SARS-CoV-2 infection (speculative)                                                                                                                                                                                                                                                                                                                                                                                                                                                                                                                                                                                                                                 |
|--------------------|---------------------------------------|------------------------------------------------------------------------------------------------------------------------------------------------------------------------------------------------------------------------------------------------------------------------------------------------------------------------------------------------------------------------------------------------------------------------------------------------------------------------------------------------------------------------------------------------------------------------------------------------------------------------------------------------------------------------------------------|
| <b>Upregulated</b> |                                       |                                                                                                                                                                                                                                                                                                                                                                                                                                                                                                                                                                                                                                                                                          |
| A1BG               | Alpha-1B-Glycoprotein                 | Function poorly understood, maybe related to hypoxia as indicated from a study in cattle (Kong et al., 2019).                                                                                                                                                                                                                                                                                                                                                                                                                                                                                                                                                                            |
| ACTB;ACTG1         | Actin Beta and Gamma-1                | F-actin is released at the site of tissue injury and scavenged by plasma Gelsolin (DiNubile, 2008)                                                                                                                                                                                                                                                                                                                                                                                                                                                                                                                                                                                       |
| C1R                | Complement C1r                        | Initiates complement activation (Hajishengallis et al., 2017; Ricklin et al., 2010, 2016).                                                                                                                                                                                                                                                                                                                                                                                                                                                                                                                                                                                               |
| C1S                | Complement C1s                        | Initiates complement activation, activated by C1R (Hajishengallis et al., 2017; Ricklin et al., 2010, 2016).                                                                                                                                                                                                                                                                                                                                                                                                                                                                                                                                                                             |
| C8A                | Complement C8 Alpha Chain             | Part of the complement system (Hajishengallis et al., 2017; Ricklin et al., 2010, 2016).                                                                                                                                                                                                                                                                                                                                                                                                                                                                                                                                                                                                 |
| CD14               | Monocyte Differentiation Antigen CD14 | CD14 is primarily displayed by monocytes and macrophages and can be released in a soluble form; soluble CD14 is also produced by the liver. Primarily involved in the recognition of bacterial LPS, its upregulation might be indicative in immune response dysregulation by SARS-CoV-2. CD14 has also been implicated in a broader spectrum antigen response and lung inflammation (Anas et al., 2010). Upregulation of CD14 expression levels in monocytes was previously reported upon SARS-Cov infection (Hu et al., 2012). Cytokines can induce the release of soluble CD14 (Shive et al., 2015) and production of soluble CD14 in the liver is induced by IL-6 (Bas et al., 2004). |
| CFB                | Complement Factor B                   | Part of the alternative complement pathway (Hajishengallis et al., 2017; Ricklin et al., 2010, 2016).                                                                                                                                                                                                                                                                                                                                                                                                                                                                                                                                                                                    |
| CFH                | Complement Factor H                   | Modulates complement activation mainly via inhibition of the alternative complement pathway (Hajishengallis et al., 2017; Ricklin et al., 2010,                                                                                                                                                                                                                                                                                                                                                                                                                                                                                                                                          |

|                    |                                             |                                                                                                                                                                                                                                                                                                                                                                                                                                                                                                      |
|--------------------|---------------------------------------------|------------------------------------------------------------------------------------------------------------------------------------------------------------------------------------------------------------------------------------------------------------------------------------------------------------------------------------------------------------------------------------------------------------------------------------------------------------------------------------------------------|
|                    |                                             | 2016).                                                                                                                                                                                                                                                                                                                                                                                                                                                                                               |
| CFI                | Complement Factor I                         | Modulates complement activity via degradation of C3b and C4b (Hajishengallis et al., 2017; Ricklin et al., 2010, 2016).                                                                                                                                                                                                                                                                                                                                                                              |
| CRP                | C-Reactive Protein                          | Acute phase response protein, strongly upregulated in COVID-19 (Shi et al., 2020).                                                                                                                                                                                                                                                                                                                                                                                                                   |
| FGA, FGB, FGG      | Fibrinogen Alpha, Beta and Gamma Chains     | Fibrinogen levels are elevated in acute-phase response (Jain et al., 2011), upregulated in COVID-19 (Shi et al., 2020).                                                                                                                                                                                                                                                                                                                                                                              |
| HP                 | Haptoglobin                                 | Elevated in acute-phase response (Jain et al., 2011). Of note, HP expression is known to be promoted by IL-6 (Li et al., 2020), which is elevated in severe COVID-19 (Ruan et al., 2020).                                                                                                                                                                                                                                                                                                            |
| ITIH3              | Inter-Alpha-Trypsin Inhibitor Heavy Chain 3 | Involved in inflammatory response to trauma (Hamm et al., 2008)                                                                                                                                                                                                                                                                                                                                                                                                                                      |
| ITIH4              | Inter-Alpha-Trypsin Inhibitor Heavy Chain 4 | Involved in inflammatory response to trauma (Hamm et al., 2008). Production of ITIH4 in the liver is upregulated by IL-6 (Bhanumathy et al., 2002).                                                                                                                                                                                                                                                                                                                                                  |
| LBP                | Lipopolysaccharide Binding Protein          | Recognises bacterial LPS, upregulation might be indicative in immune response dysregulation by SARS-CoV-2.                                                                                                                                                                                                                                                                                                                                                                                           |
| LGALS3BP           | Galectin 3 Binding Protein                  | Upregulated in viral infections, promotes inflammation (Xu et al., 2019), has been shown to induce IL-6 expression (Silverman et al., 2012).                                                                                                                                                                                                                                                                                                                                                         |
| LRG1               | Leucine-Rich Alpha-2-Glycoprotein           | LRG1 expression is induced by IL-6 (Shirai et al., 2009), which is elevated in severe COVID-19 (Ruan et al., 2020). LRG1 promotes angiogenesis (Wang et al., 2013) and has been reported to be associated with local inflammation (Naka and Fujimoto, 2018). LRG1 is known to promote lung fibrosis (Honda et al., 2017). Secretion of LRG1 by neutrophils upon activation has been reported (Druhan et al., 2017). Of note, neutrophil-lymphocyte-ratio is elevated in COVID-19 (Qin et al., 2020). |
| SAA1 and SAA1;SAA2 | Serum Amyloid A1 and A2                     | SAA1 and SAA2 are markers of inflammatory response and tissue injury (Sack, 2018).                                                                                                                                                                                                                                                                                                                                                                                                                   |

|                      |                                        |                                                                                                                                                                                                                                                                                                                                                                                                                                                                                                                                                                                                                                                                                                                                                         |
|----------------------|----------------------------------------|---------------------------------------------------------------------------------------------------------------------------------------------------------------------------------------------------------------------------------------------------------------------------------------------------------------------------------------------------------------------------------------------------------------------------------------------------------------------------------------------------------------------------------------------------------------------------------------------------------------------------------------------------------------------------------------------------------------------------------------------------------|
|                      |                                        | Expression is known to be induced by IL-6 (Hagihara et al., 2004).                                                                                                                                                                                                                                                                                                                                                                                                                                                                                                                                                                                                                                                                                      |
| SERPINA10            | Protein Z-Dependent Protease Inhibitor | Acts in complex with Protein Z to inhibit the F10a coagulation factor (Almawi et al., 2013), while coagulation has been observed to be increased in severe COVID-19 (Zhou et al., 2020).                                                                                                                                                                                                                                                                                                                                                                                                                                                                                                                                                                |
| <b>Downregulated</b> |                                        |                                                                                                                                                                                                                                                                                                                                                                                                                                                                                                                                                                                                                                                                                                                                                         |
| ALB                  | Albumin                                | Low levels associated with acute-phase response (Soeters et al., 2019) and observed in critical COVID-19 (Zhou et al., 2020).                                                                                                                                                                                                                                                                                                                                                                                                                                                                                                                                                                                                                           |
| APOA1                | Apolipoprotein A1                      | Major component of the High-Density Lipoprotein (HDL) complex, which is a modulator of innate immune response and inflammation (Fotakis et al., 2019; Gordon et al., 2011; Macpherson et al., 2019; White et al., 2017). Although it might be that APOA1 levels drop upon the infection, we can also speculate that low APOA1 levels are a risk factor for COVID-19. Notably, We observe clear correlation of APOA1 with HDL cholesterol and only weak negative correlation with age (Figure S6). Of note, decreased APOA1 levels have been associated with poor prognosis in systemic inflammatory response (Kumaraswamy et al., 2012; Sirniö et al., 2017; Tani et al., 2016).                                                                        |
| APOC1                | Apolipoprotein C1                      | Part of multiple apolipoprotein complexes, has links to immune response and inflammation (Fuior and Gafencu, 2019).                                                                                                                                                                                                                                                                                                                                                                                                                                                                                                                                                                                                                                     |
| GSN                  | Gelsolin                               | Low levels of plasma gelsolin are associated with inflammation. One of the primary mechanisms leading to this is believed to be the recruitment of gelsolin, which has actin recycling function, to the sites of tissue injury, depleting its plasma levels. Of note, we observed increased serum levels of the ACTB;ACTG1 protein group in severe and critical COVID-19 cases. Importantly, plasma gelsolin is a modulator of inflammation, which carries a protective function (DiNubile, 2008; Li et al., 2012). Low plasma gelsolin is a marker of poor prognosis in various pathological conditions, including diabetes (Khatri et al., 2014), cancers (Asare-Werehene et al., 2019; Stock et al., 2015) and sepsis (Lee et al., 2007), leading to |

|    |             |                                                                                                                                                                                                                                                            |
|----|-------------|------------------------------------------------------------------------------------------------------------------------------------------------------------------------------------------------------------------------------------------------------------|
|    |             | suggestions and animal tests for its therapeutic use. Of note, treatment with gelsolin has been observed to decrease IL-6 levels in mice (Cheng et al., 2017). Gelsolin treatment has been suggested to promote epithelial repair (Wittmann et al., 2018). |
| TF | Transferrin | Iron carrier, observed to decrease in acute phase response (Jain et al., 2011).                                                                                                                                                                            |

**Table S4. Date of symptom onset and blood sampling for the patients from the exploratory cohort.**

| Patient | Onset of symptoms | Admission to hospital | blood sampling                                                                                  |
|---------|-------------------|-----------------------|-------------------------------------------------------------------------------------------------|
| 1       | 15/02/2020        | 01/03/2020            | 02/03,04/03,06/03,07/03,09/03,10/03,11/03,12/03,13/03,16/03,18/03,20/03,23/03,23/03,25/03,27/03 |
| 2       | 25/02/2020        | 02/03/2020            | 04/03,06/03,07/03,08/03,09/03                                                                   |
| 3       | 29/02/2020        | 11/03/2020            | 11/03,12/03,13/03,16/03,18/03,20/03,23/03,23/03,25/03                                           |
| 5       | 28/02/2020        | 11/03/2020            | 12/03,13/03,16/03,18/03                                                                         |
| 6       | 11/03/2020        | 12/03/2020            | 13/03,16/03,18/03                                                                               |
| 7       | 08/03/2020        | 14/03/2020            | 16/03,19/03,20/03,23/03,25/03                                                                   |
| 8       | 21/02/2020        | 15/03/20              | 20/03,23/03,25/03,27/03                                                                         |
| 9       | 12/03/2020        | 16/03/2020            | 17/03,17/03,20/03,23/03,25/03,27/03                                                             |
| 10      | 09/03/2020        | 17/03/2020            | 19/03,20/03                                                                                     |
| 11      | 08/03/2020        | 17/03/2020            | 20/03,23/03,25/03,27/03                                                                         |
| 12      | 21/02/2020        | 18/03/2020            | 17/03,20/03,23/03,25/03,27/03                                                                   |
| 13      | 13/03/2020        | 19/03/2020            | 20/03,23/03,25/03,27/03                                                                         |
| 14      | 15/03/2020        | 21/03/2020            | 23/03                                                                                           |
| 15      | NA                | 17/03/2020            | 23/03,25/03                                                                                     |
| 16      | 19/03/2020        | 22/03/2020            | 23/03,25/03,27/03                                                                               |

|    |            |            |                   |
|----|------------|------------|-------------------|
| 18 | 04/03/2020 | 10/30/2020 | 25/03             |
| 19 | 14/03/2020 | 19/03/2020 | 23/03,25/03       |
| 20 | 12/03/2020 | 20/30/2020 | 23/03,25/03,27/03 |
| 21 | 12/03/2020 | 20/03/2020 | 23/03,25/03,27/03 |
| 22 | 09/03/2020 | 18/03/2020 | 23/03,25/03,27/03 |
| 23 | NA         | 23/03/2020 | 23/03,25/03,27/03 |
| 24 | 06/03/2020 | 21/03/2020 | 25/03,27/03       |
| 25 | NA         | 23/03/2020 | 25/03,27/03       |
| 26 | 15/03/2020 | 24/03/2020 | 25/03,27/03       |
| 27 | 12/03/2020 | 12/03/2020 | 25/03             |
| 28 | 20/03/2020 | 23/03/2020 | 25/03             |
| 29 | 13/03/2020 | 23/03/2020 | 25/03,27/03       |
| 32 | NA         | 21/03/2020 | 27/03             |
| 34 | 21/03/2020 | 26/03/2020 | 27/03             |
| 35 | 15/03/2020 | 25/03/2020 | 27/03             |
| 37 | 10/03/2020 | 24/03/2020 | 27/03             |

**Table S5. List of FDA approved biomarkers, quantified with ultra-high-throughput serum proteomics.**

| <b>Protein Name</b>           |
|-------------------------------|
| Albumin                       |
| $\alpha$ -1-acid glycoprotein |
| $\alpha$ -1-antitrypsin       |
| $\alpha$ -2-antiplasmin       |
| $\alpha$ -2-HS-glycoprotein   |
| $\alpha$ -2-macroglobulin     |
| Antithrombin III              |
| Apolipoprotein B              |
| $\beta$ -2-microglobulin      |

$\beta$ -Thromboglobulin  
Biotinidase  
Ceruloplasmin  
Cholinesterase  
Complement C1  
Complement C1Q  
Complement C3  
Complement C4  
Complement C5  
CRP  
Cystatin C  
Factor IX antigen  
Factor X  
Factor XIII  
Fibrinogen  
Fibronectin  
Haptoglobin  
Hemopexin  
IgG  
IgM  
Insulin-like growth factor II  
IGFBP-3  
 $\kappa$  light chains  
 $\lambda$  light chains  
Lipoprotein (a)  
Lysozyme  
Plasminogen  
Prealbumin / transthyretin  
Properdin factor B  
Protein S  
Retinol binding protein  
Sex hormone-binding globulin  
Thyroxine binding globulin  
Transferrin receptor  
Von Willebrand factor

Table S6. Lower and upper m/z limits of the SWATH precursor selection windows used.

| Lower m/z limit | Upper m/z limit | CE Spread |
|-----------------|-----------------|-----------|
| 449.5           | 468.9           | 5         |
| 467.9           | 486.4           | 5         |
| 485.4           | 503.3           | 5         |
| 502.3           | 519.8           | 5         |
| 518.8           | 535.7           | 5         |
| 534.7           | 550.9           | 5         |
| 549.9           | 565.5           | 5         |
| 564.5           | 579.7           | 5         |
| 578.7           | 594             | 5         |
| 593             | 607.9           | 5         |
| 606.9           | 621.9           | 5         |
| 620.9           | 635.8           | 5         |
| 634.8           | 649.7           | 5         |
| 648.7           | 663.3           | 5         |
| 662.3           | 676.3           | 5         |
| 675.3           | 689.6           | 5         |
| 688.6           | 702.9           | 5         |
| 701.9           | 716.8           | 5         |
| 715.8           | 732.3           | 5         |
| 731.3           | 748.9           | 5         |
| 747.9           | 766.4           | 5         |
| 765.4           | 784.2           | 5         |
| 783.2           | 803             | 5         |

|       |       |   |
|-------|-------|---|
| 802   | 824.7 | 5 |
| 823.7 | 849.6 | 5 |

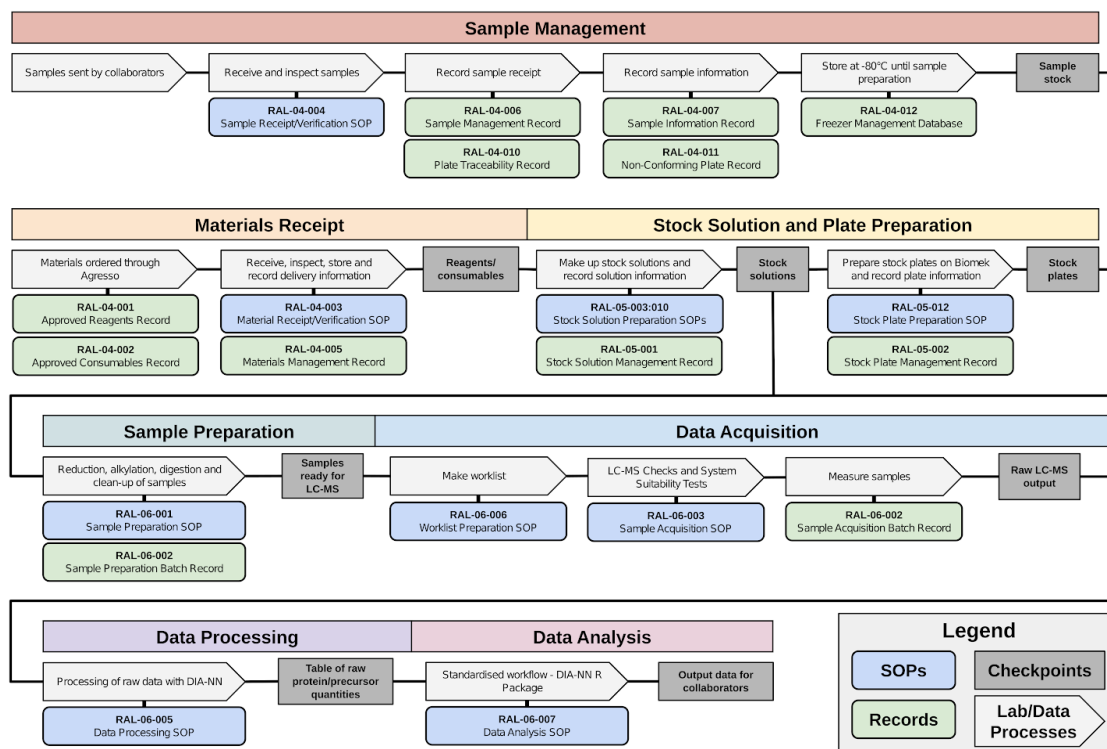

Figure S1, Related to Figure 1. **Detailed overview of the high-throughput proteomics workflow.** This figure details the documentation and management tasks orienting on ISO13485 standardisation for medical devices as reference.



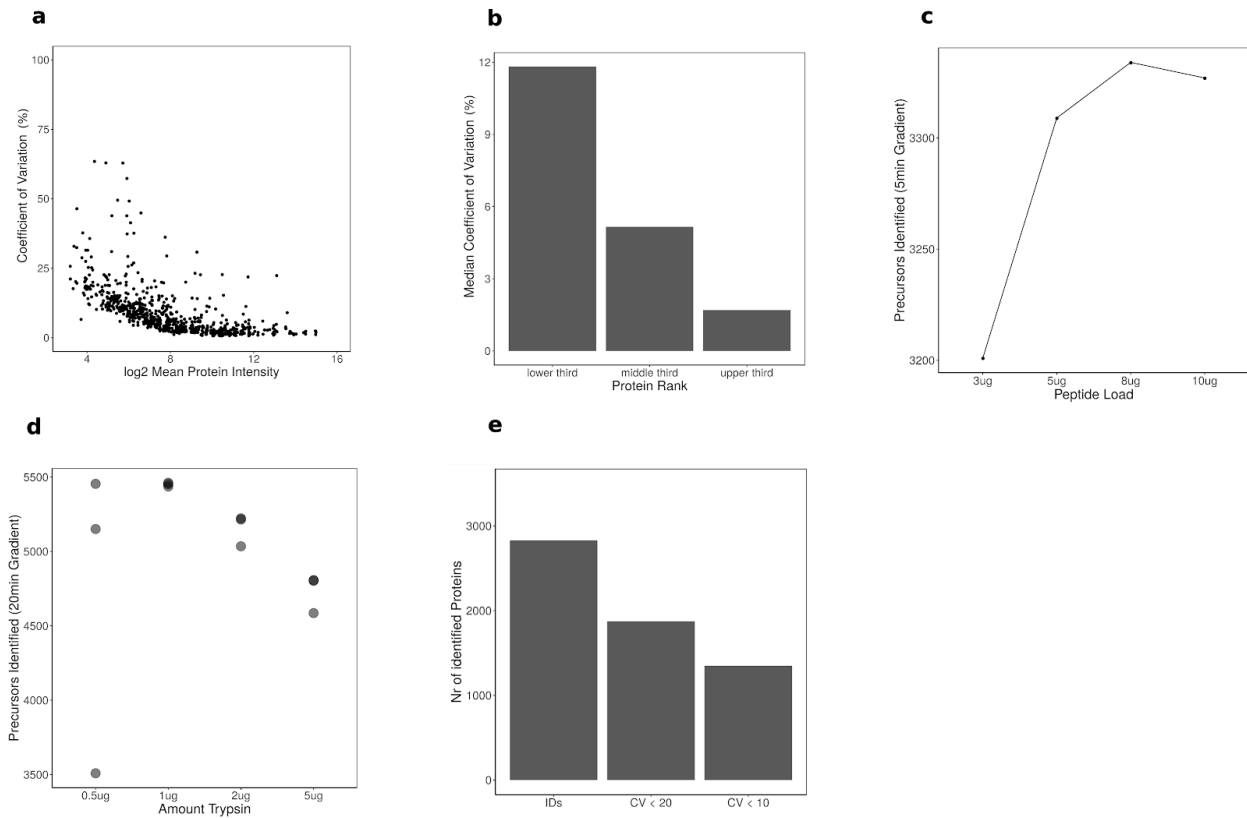

**Figure S2. Quality parameters of protein quantification in ultra-high-throughput proteomics.** **a.** Coefficient of Variation (%) as a function of log2 mean protein intensity for 39 repeated injections of a pooled whole-serum tryptic digest that were run over a period of > 4 days, to test for instrument stability.. **b.** Median CV value for low, middle, and high-intensity proteins in the 39 repeated injections. **c.** Number of precursors identified in 5-min high-flow SWATH runs with different amounts of serum proteins injected. **d.** Number of precursors identified in a plasma sample with different amounts of trypsin used for digestion, run with a 20-min water to acetonitrile gradient. **e.** Proteins identified in triplicate injections of a mammalian (K562) cell lysate using the 5-minute high-flow SWATH runs presented in this study. Total number of unique Proteins (1% FDR), number of unique Proteins quantified with less than 20% coefficient of variation (CV) and less than 10% CV are shown.

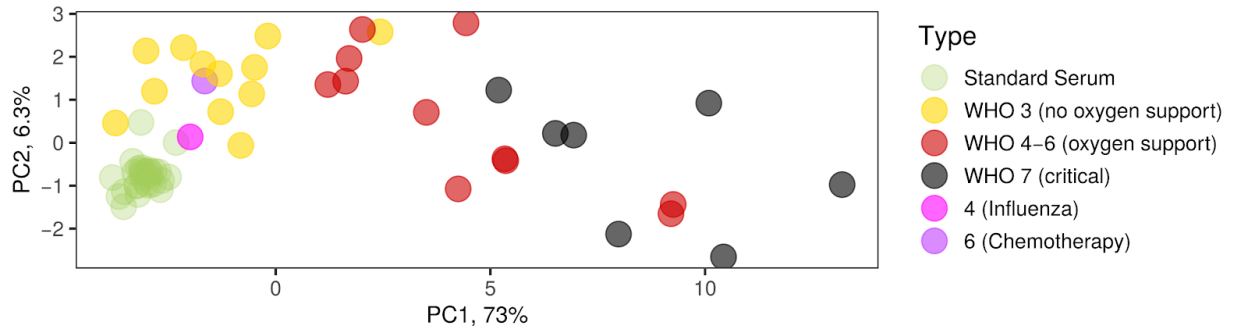

Figure S3: **Clustering of untargeted plasma proteomes led to the reclassification of two study participants.** Principal component analysis based on proteins differentially expressed depending on COVID-19 severity grading according to WHO. Patients 4 and 6 were initially clinically assessed as “severe” (Braun et al, 2020) but clustered with patients that suffered from a mild form of COVID-19. A retrospective assessment revealed that patient 6 had received R-CHOP chemotherapy 10 days prior to study inclusion and patient 4 was in fact suffering from type B influenza rather than SARS-CoV-2 infection. Patient 6 was categorized as mild by using the WHO ordinal outcome scale of clinical improvement (World Health Organisation, 2020) and Patient 4 was removed from the analysis. Please note that the PCA transformation is slightly different from that in Figure 4b, as the addition of two extra samples for patient 4 led to slightly different protein quantities being calculated for all the samples by the MaxLFQ algorithm (Cox et al., 2014).

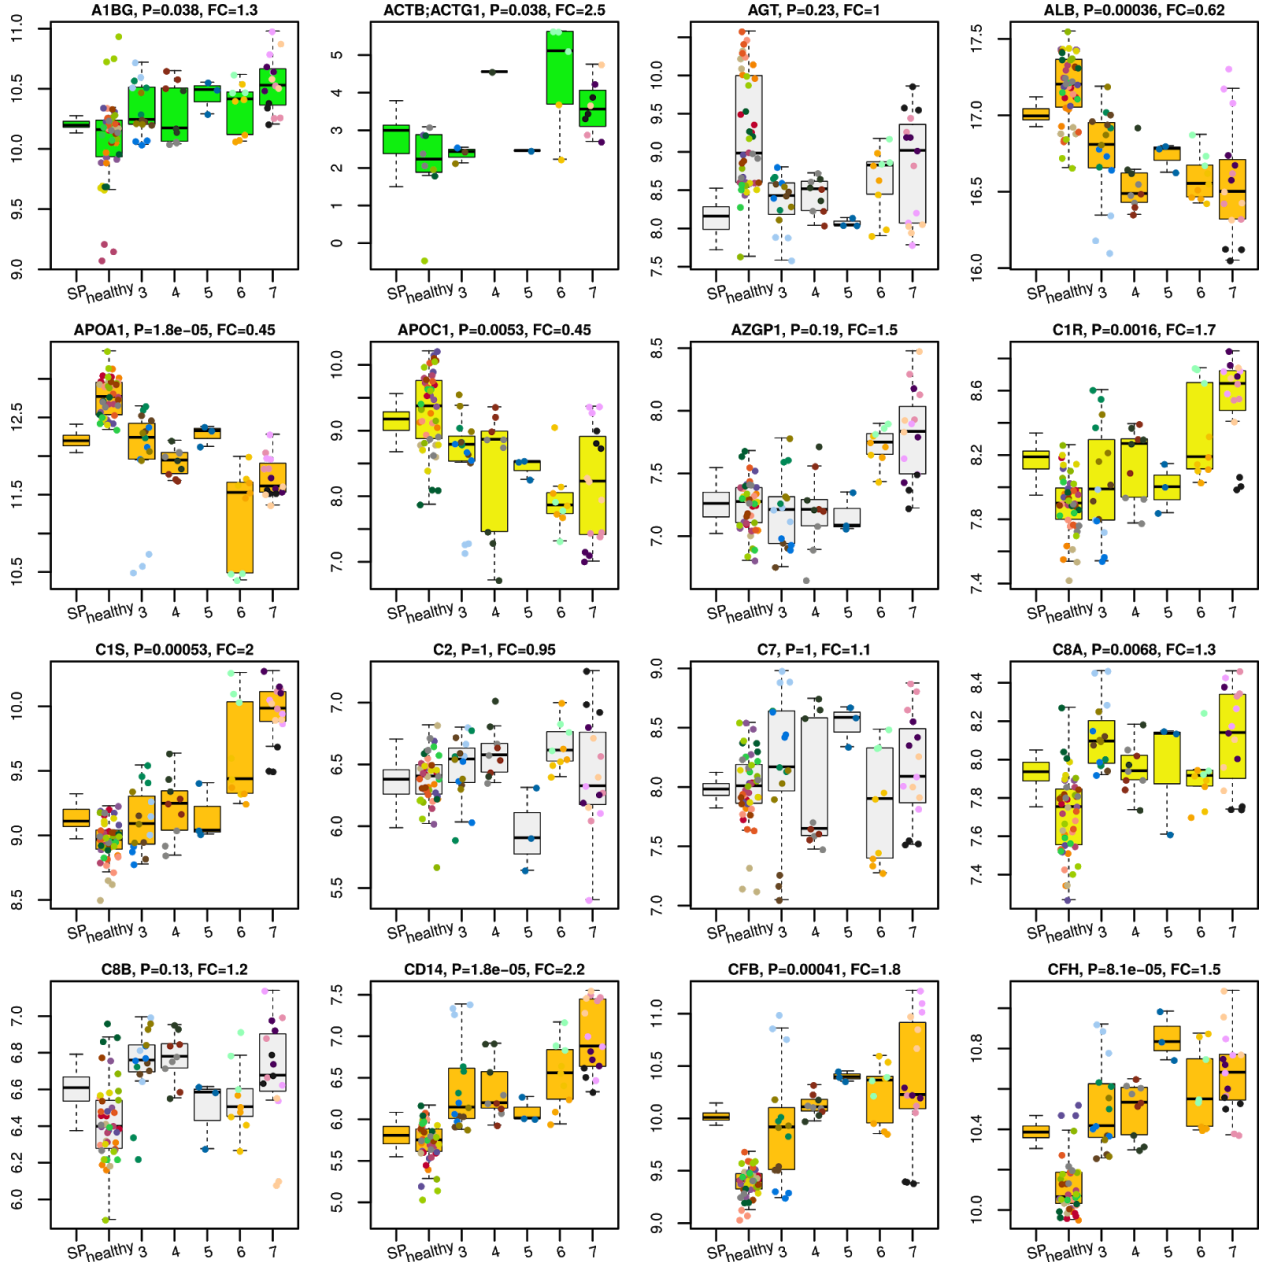

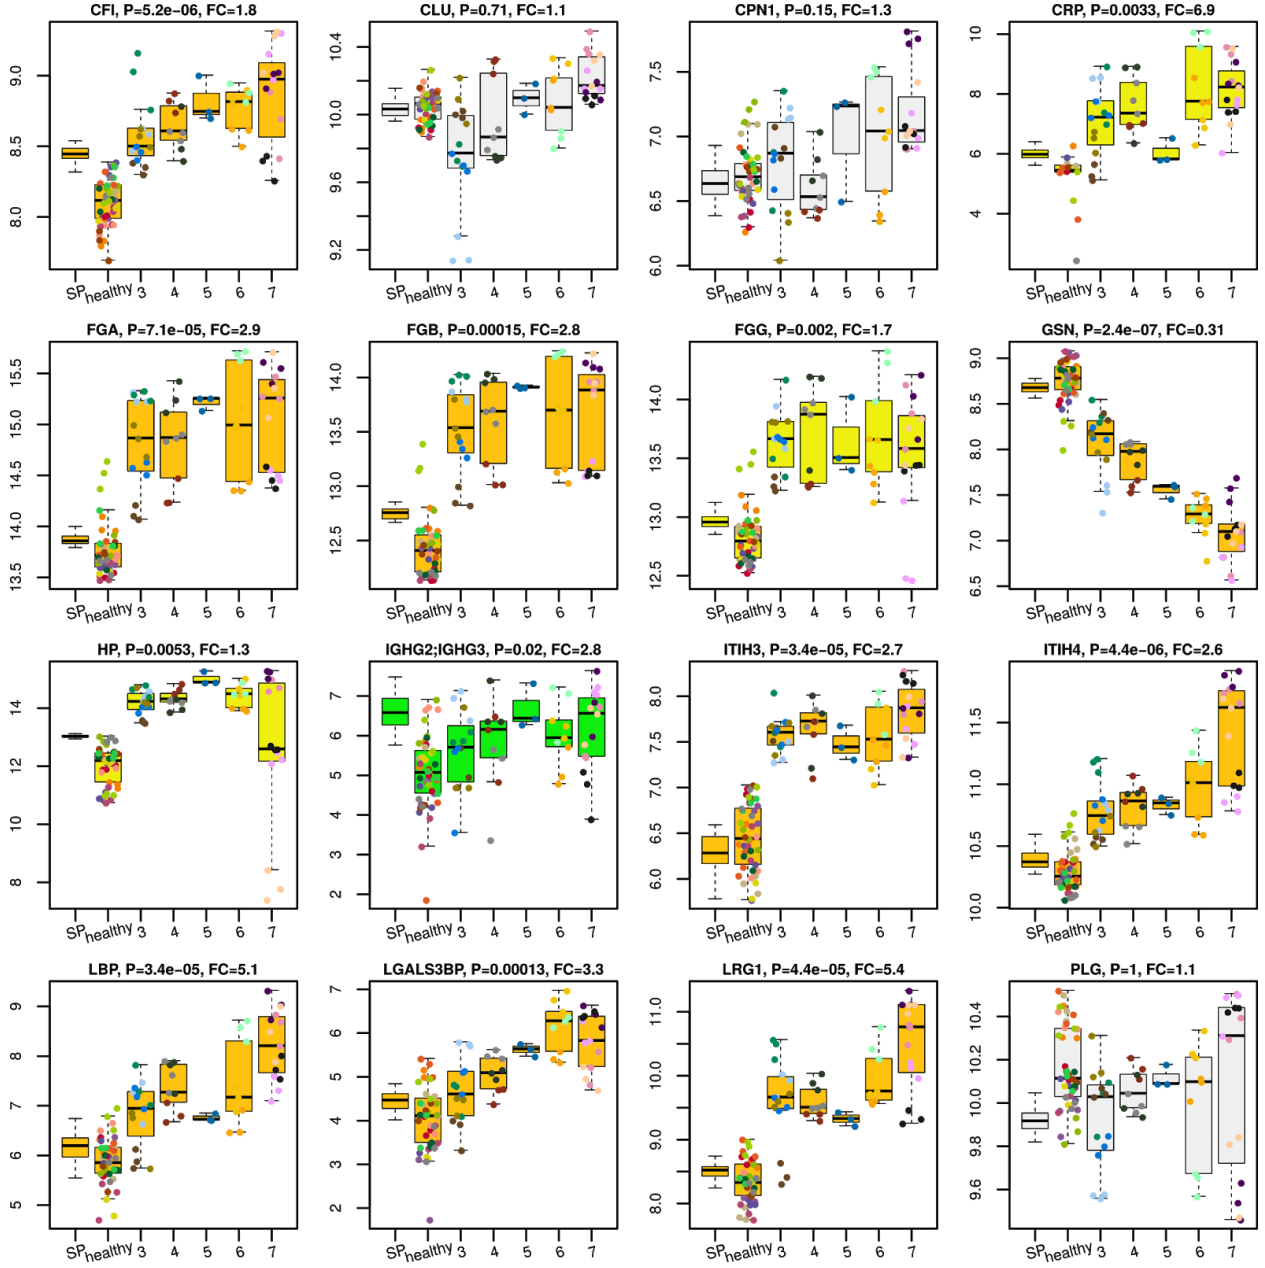

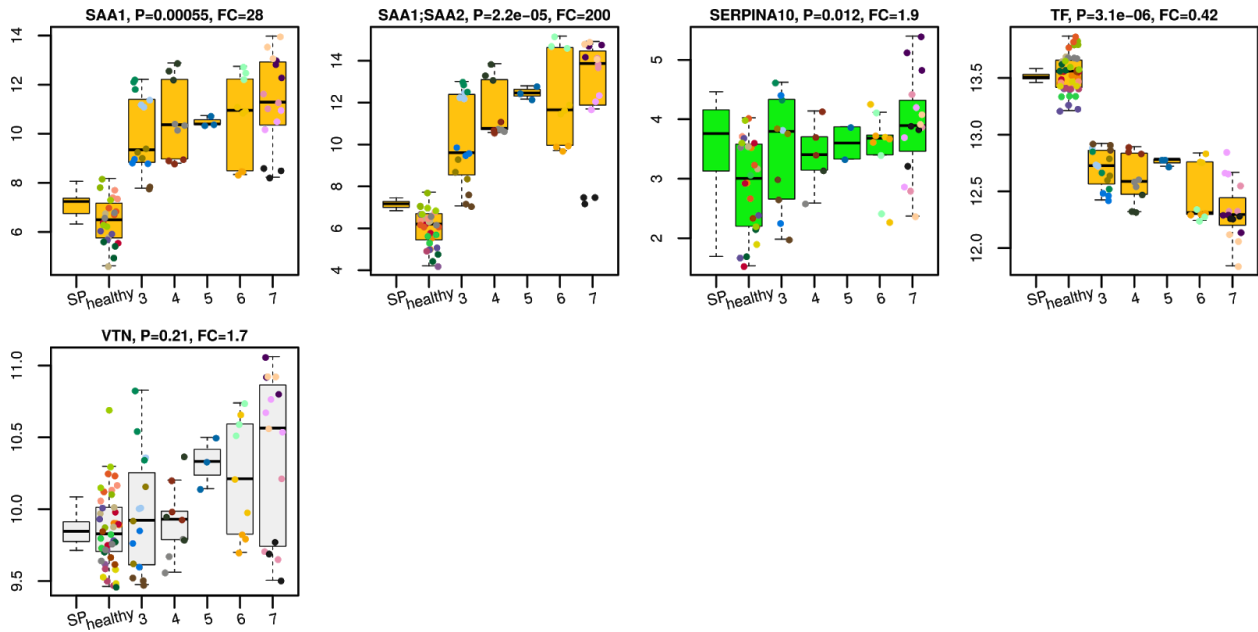

Figure S4. **Proteomes in mild, severe and critical SARS-CoV-2 infection for patients in the validation cohort.** Differentially expressed proteins are highlighted with colours depending on the multiple testing-corrected p-values: green:  $P < 0.05$ , yellow:  $P < 0.01$ , orange:  $P < 0.001$ .

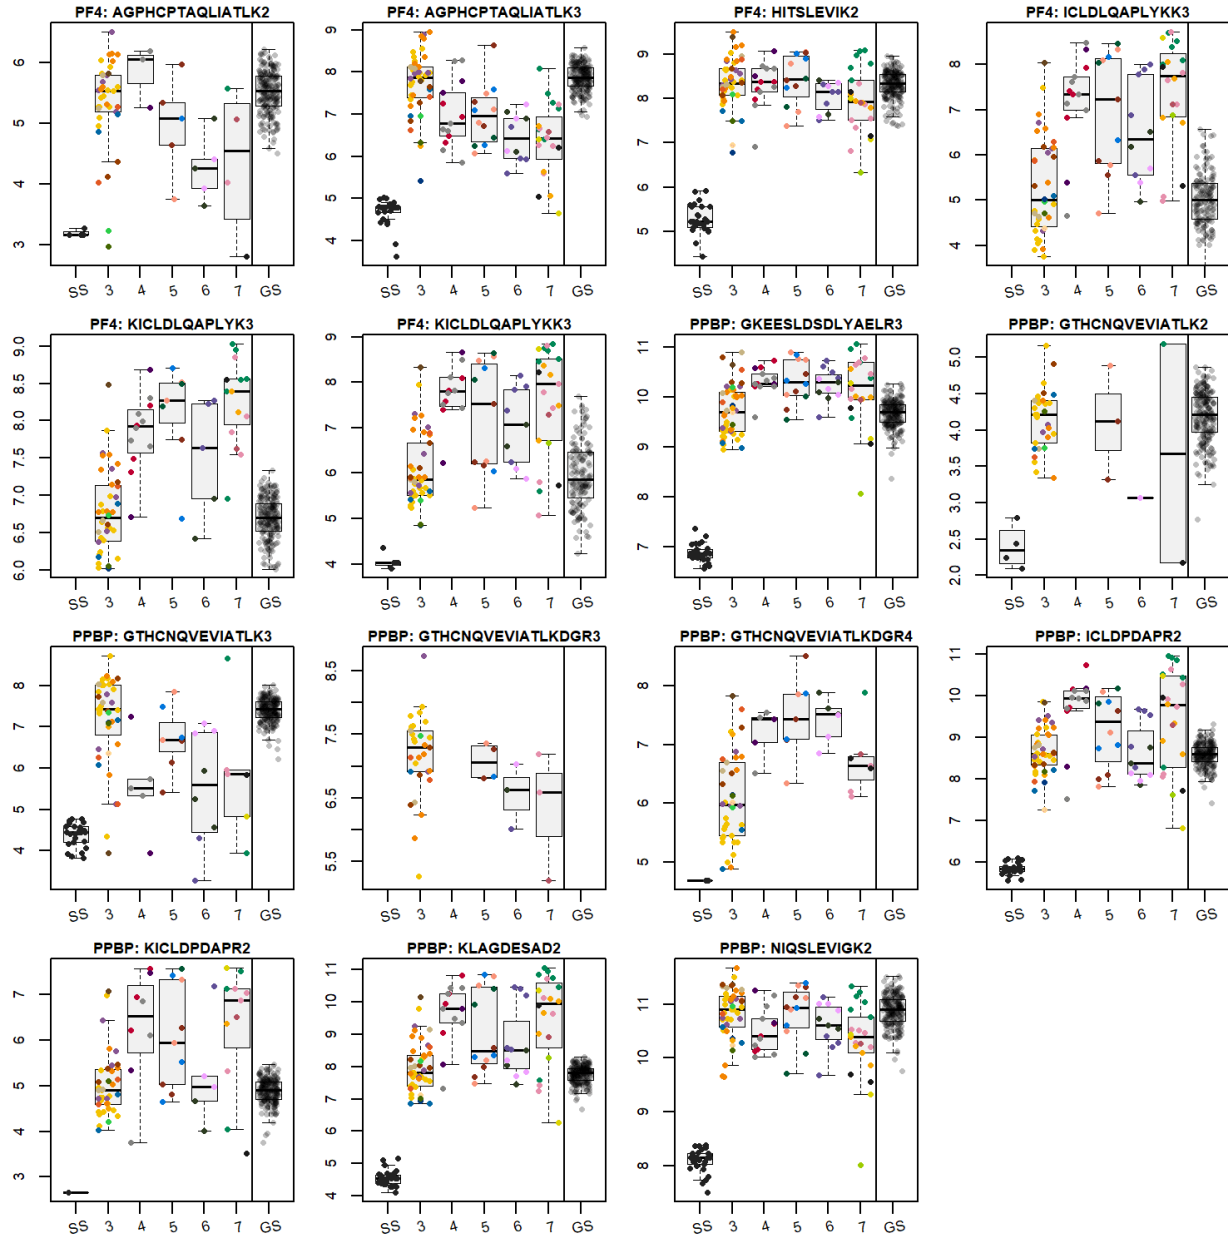

Figure S5. **Differential response of peptide precursors mapping to PF4 and PPBP.** Boxplots are presented for log<sub>2</sub>-transformed peptide precursor quantities. The peptide precursor charge is indicated with a number after the amino acid sequence. All cysteines were considered carbamidomethylated. Boxplots are drawn based on individual measurements (multiple timepoints per patient), which are indicated with points (different colours for different patients, ordered from left to right by the time taken). Standard Serum sample preparation controls are indicated with “SS” and represent the technical variability (sample preparation + LC-MS). The last box represents the variability seen in the GS study; as the absolute quantities from the two studies cannot be compared directly (the data was acquired on different LC-MS setups), to

simplify the visual assessment of the variability, the median of GS quantities was matched to the median of WHO grade 3 (no oxygen support) COVID-19 cases.

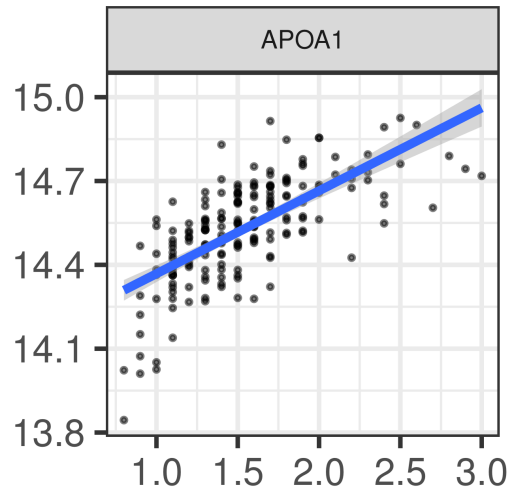

Figure S6. **Log<sub>2</sub>-transformed serum levels of Apolipoprotein A1 (APOA1; arbitrary units) plotted against the HDL-Cholesterol concentration (mmol/L) in the GS study.**

Figure S7 (following 18 pages). **Proteomes in mild, severe and critical SARS-CoV-2 infection (complete list).** Differentially expressed proteins are highlighted with colours depending on the multiple testing-corrected p-values: green:  $P < 0.05$ , yellow:  $P < 0.01$ , orange:  $P < 0.001$ .

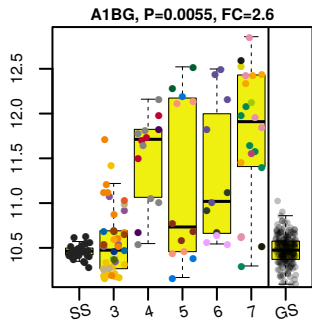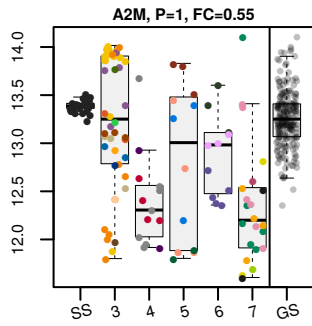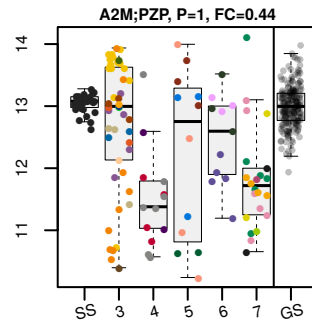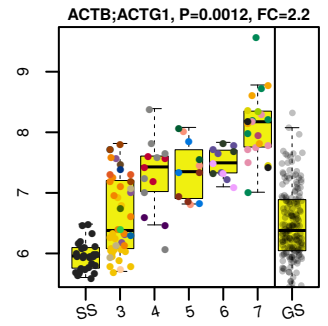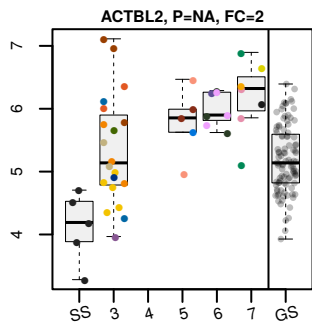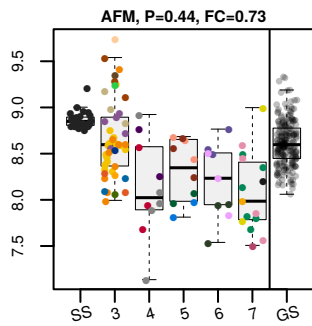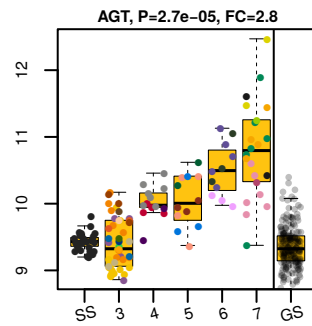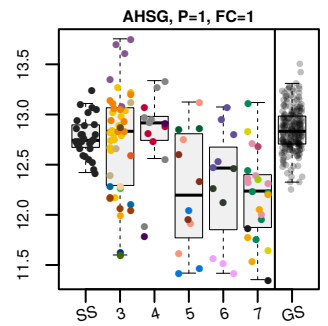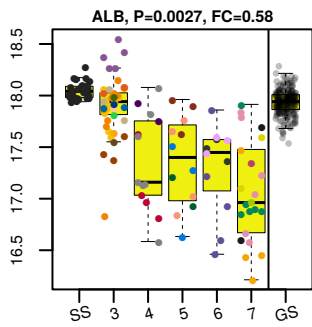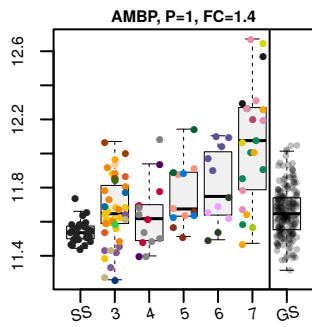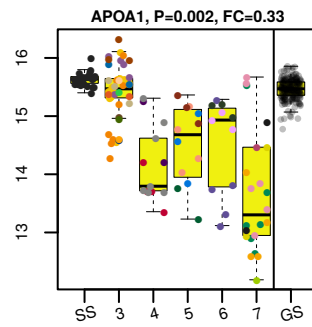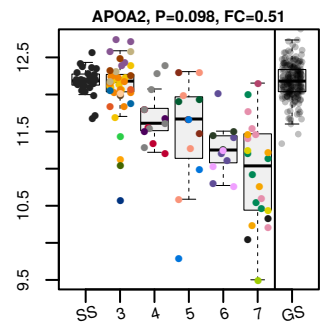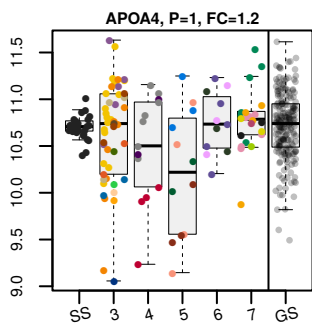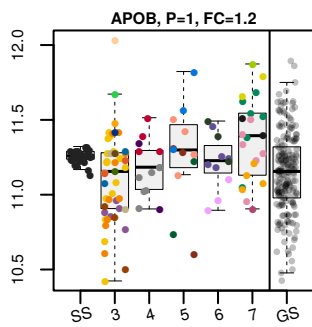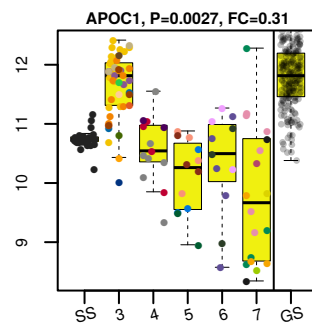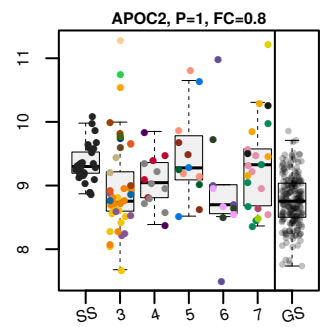



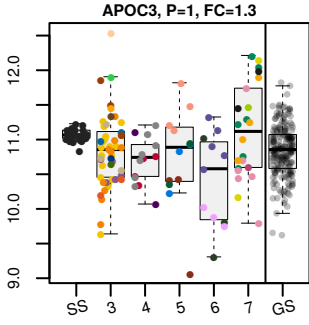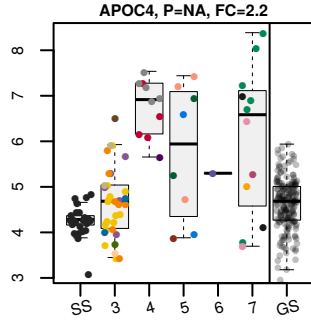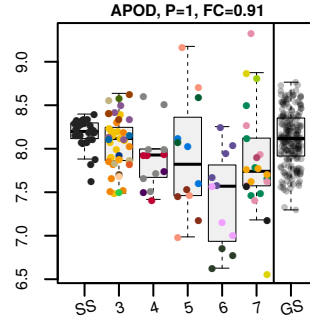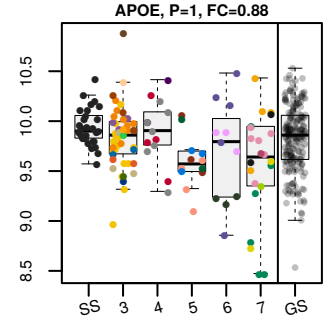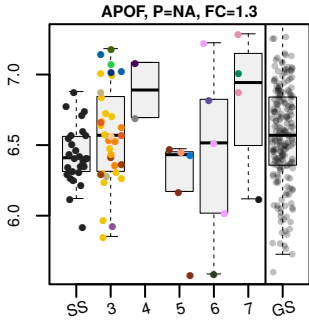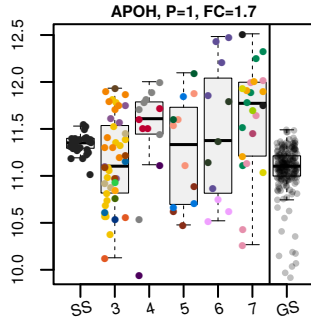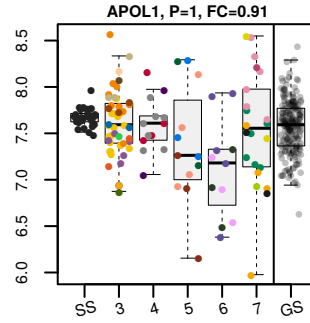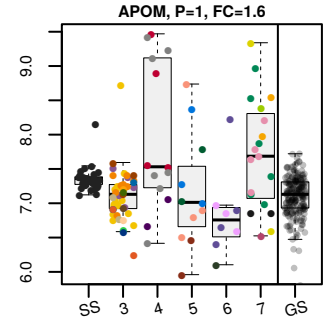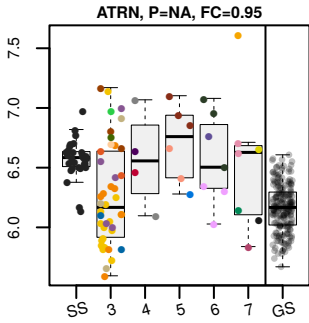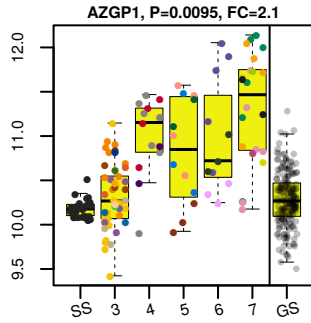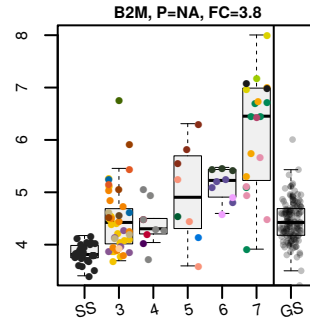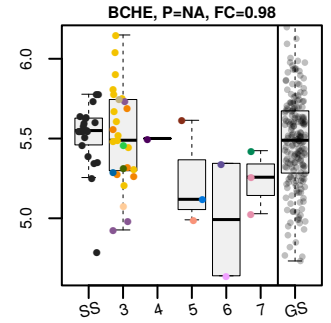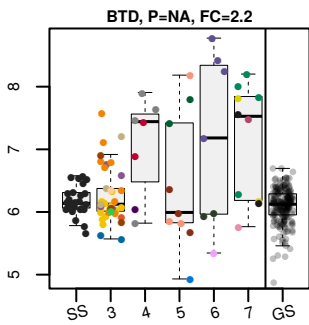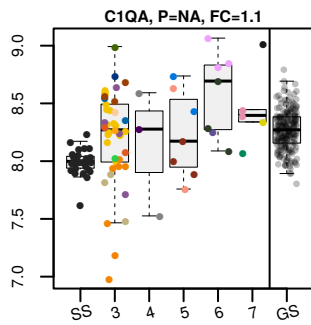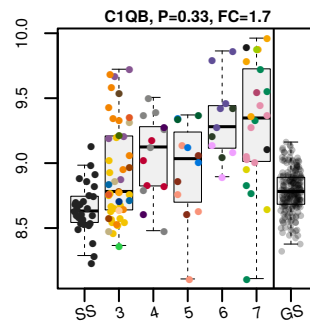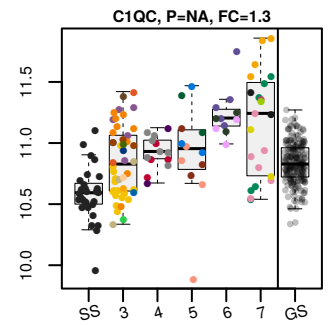

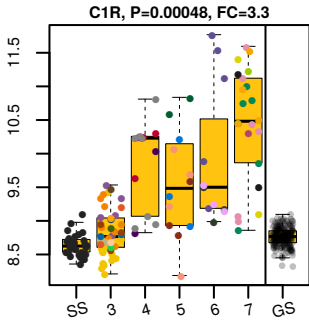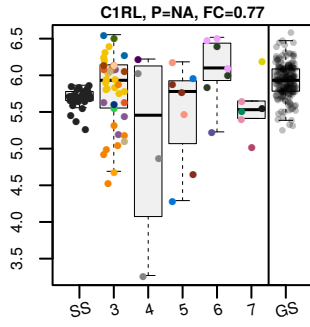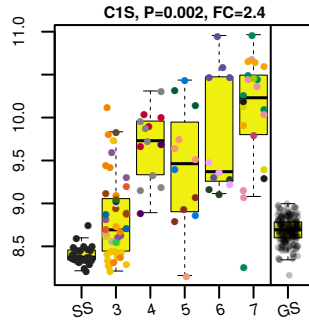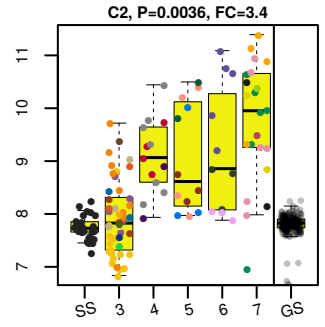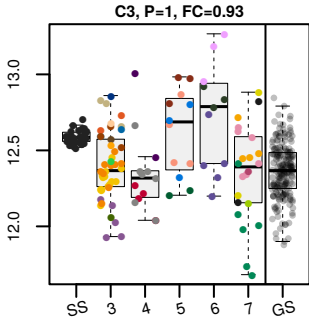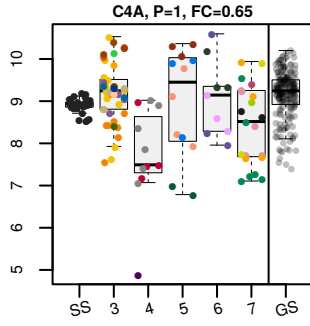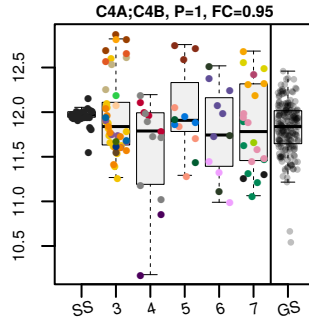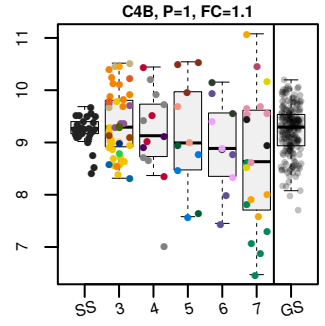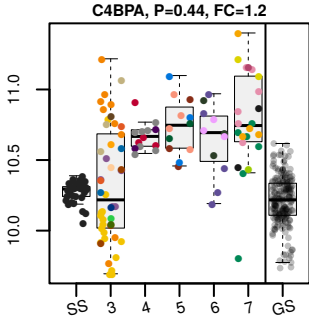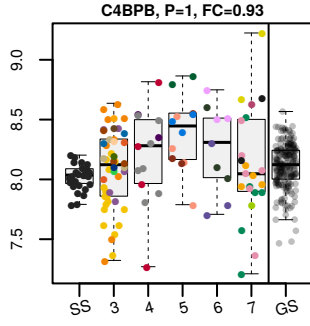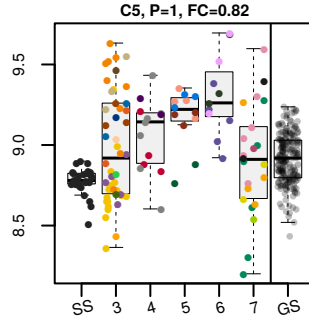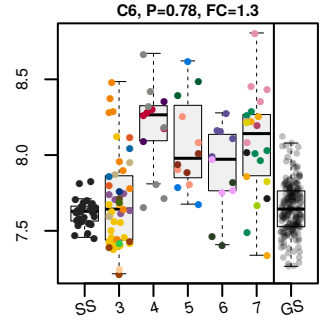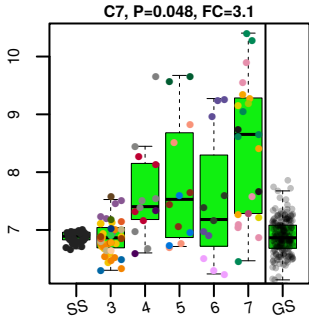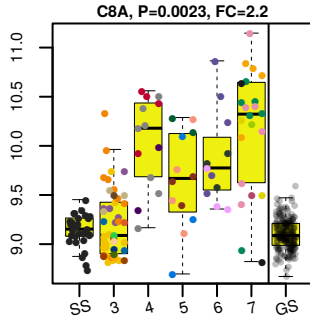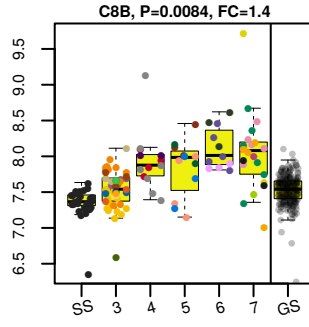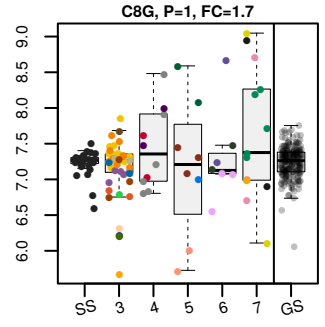

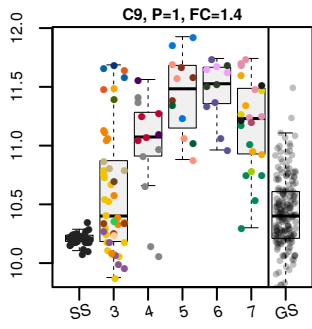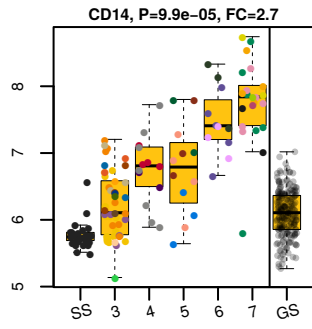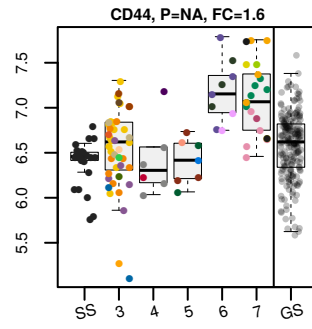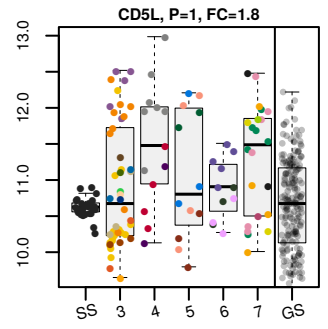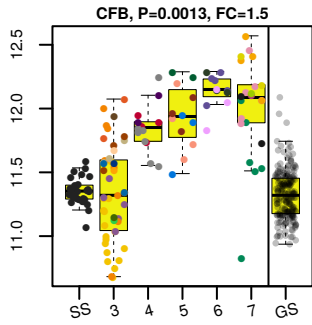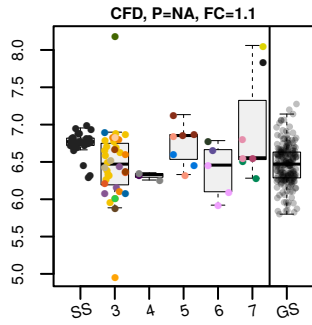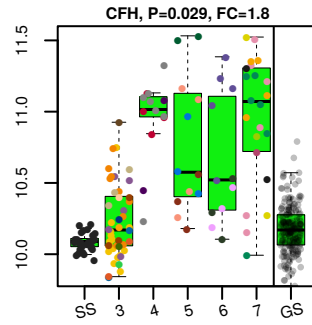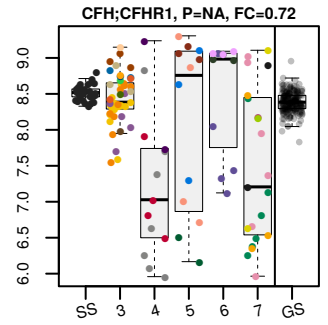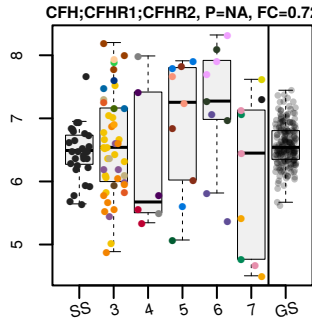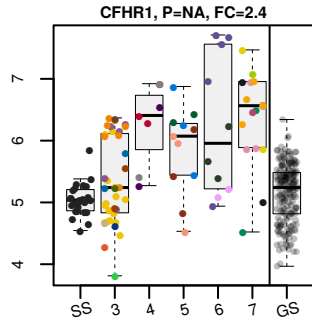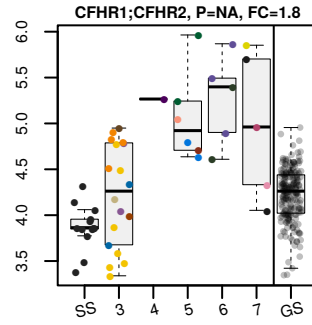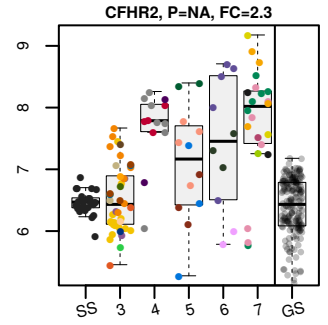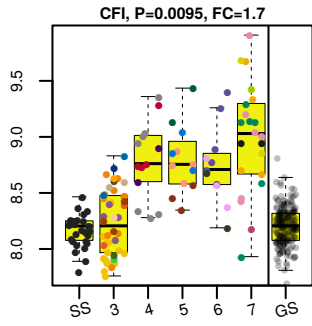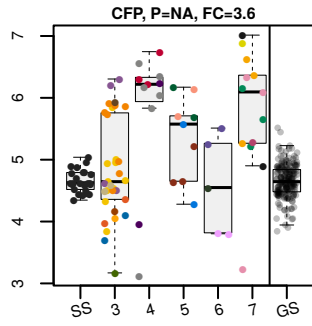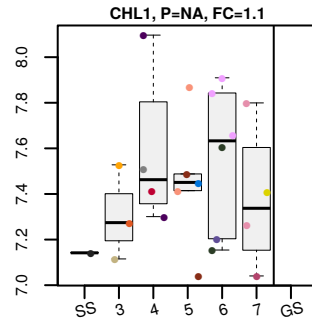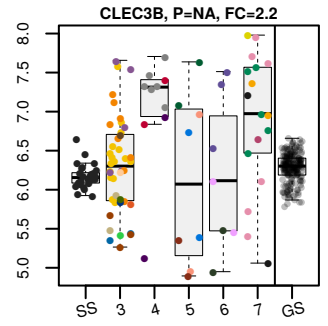

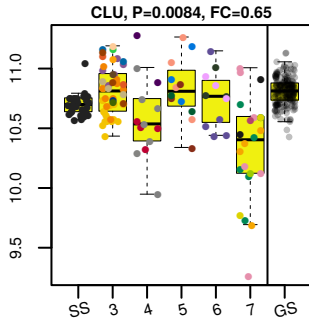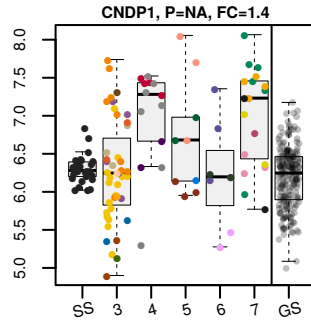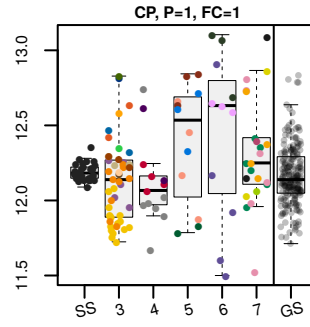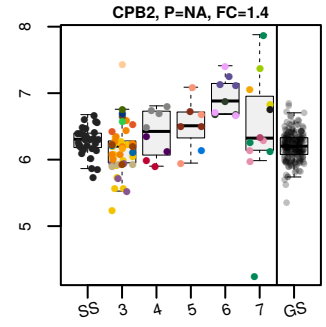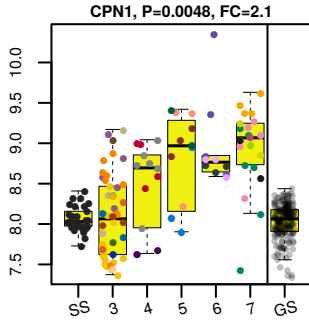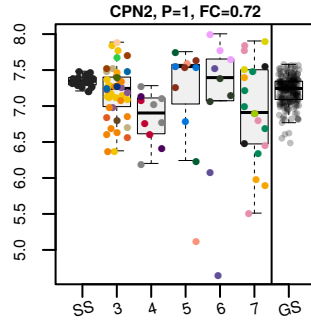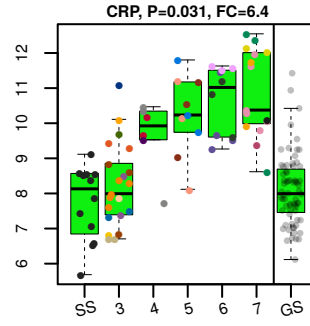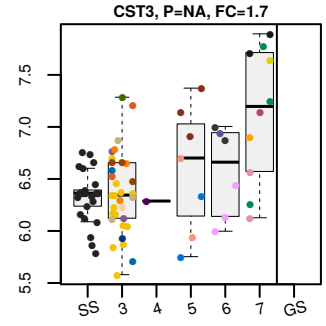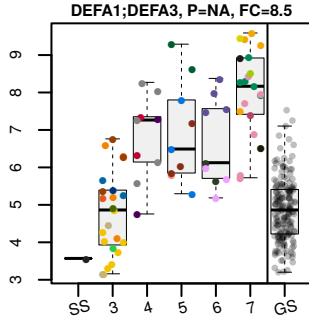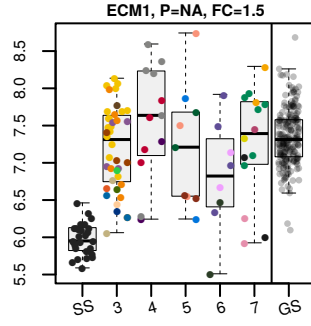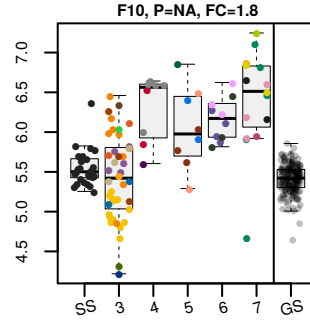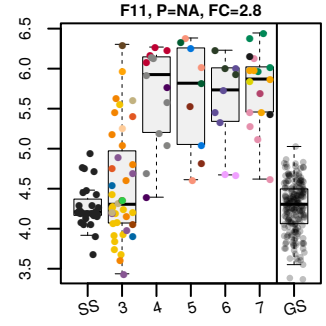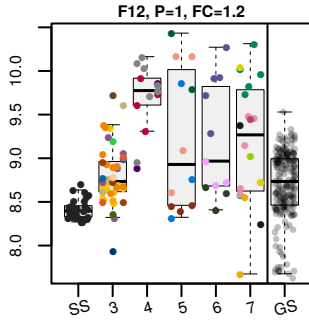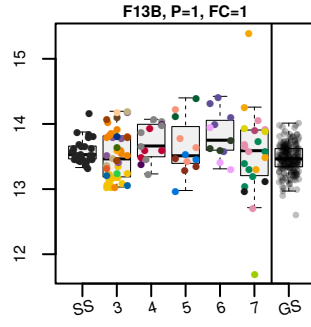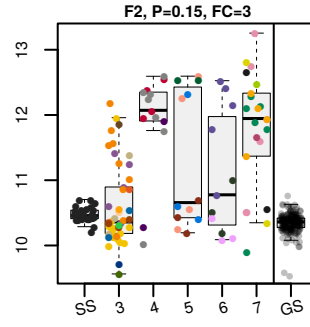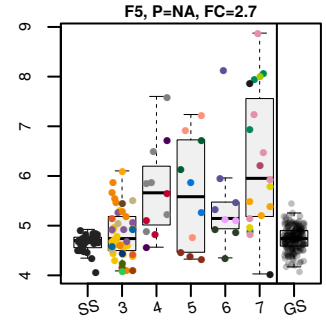

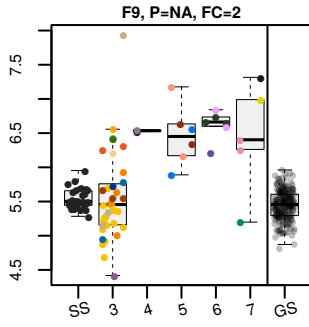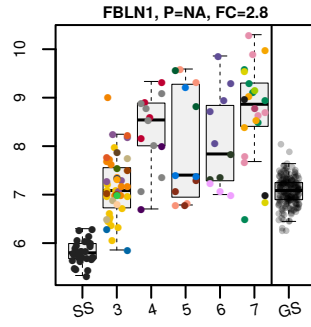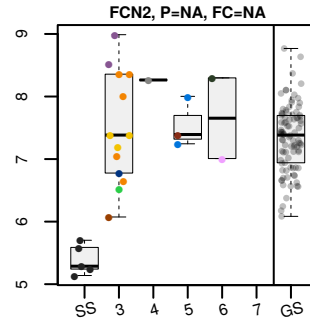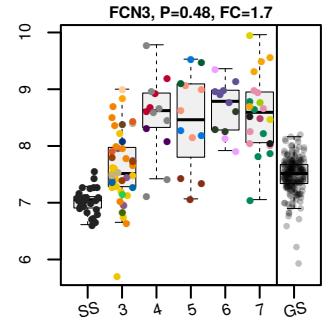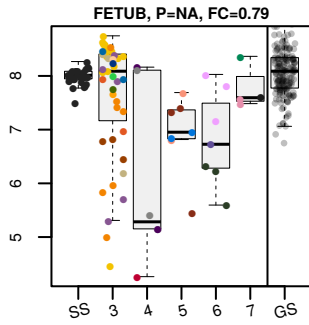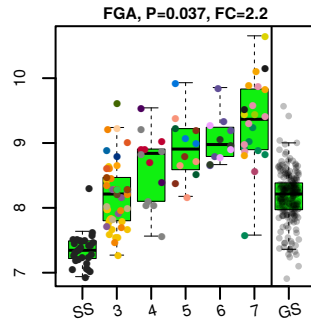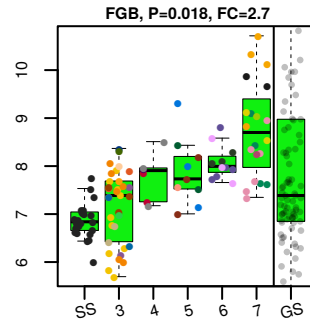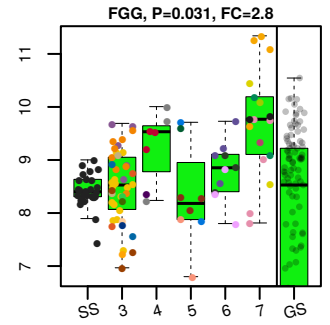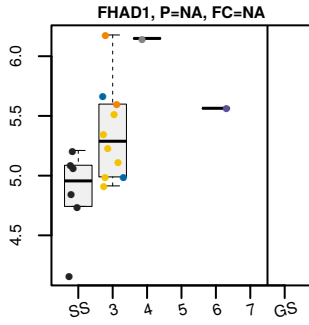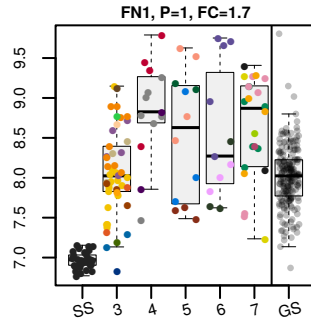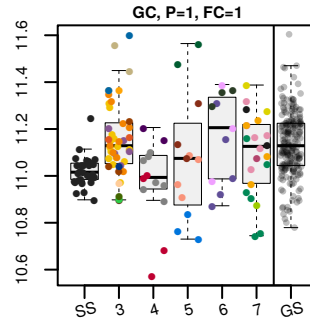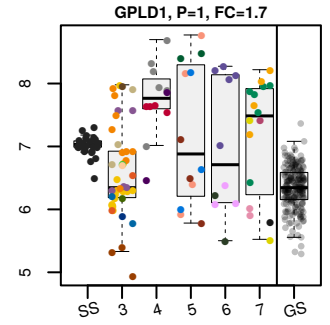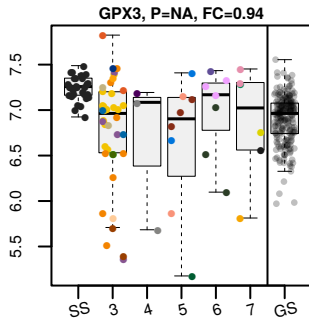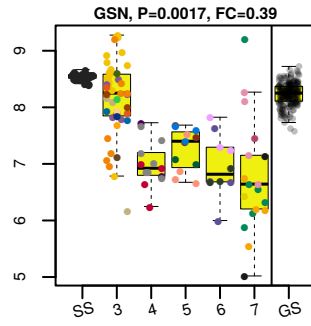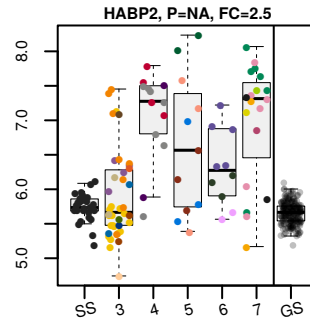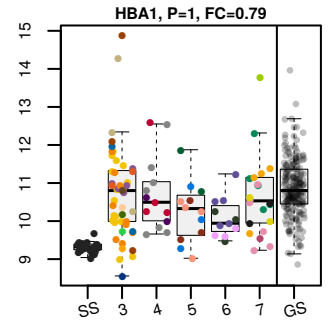

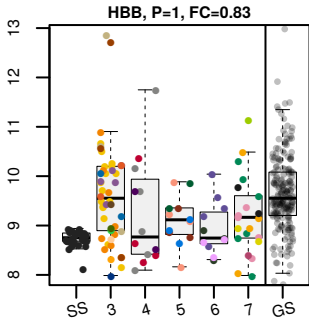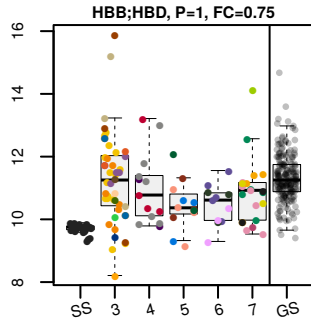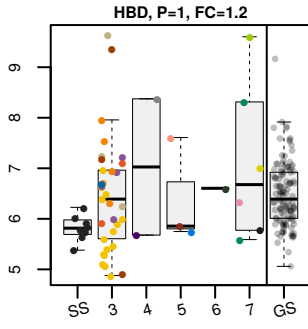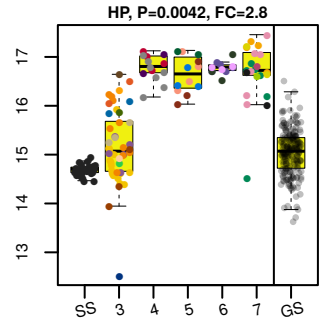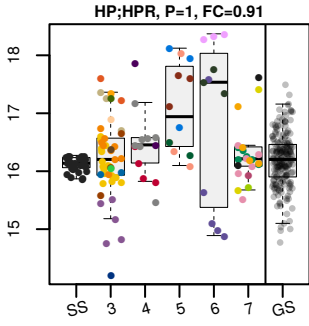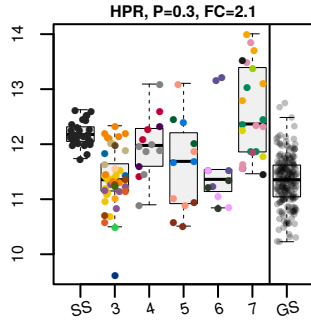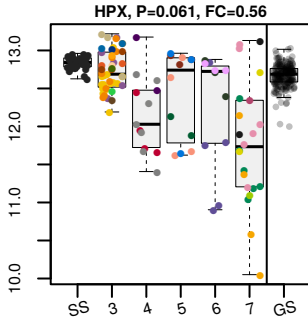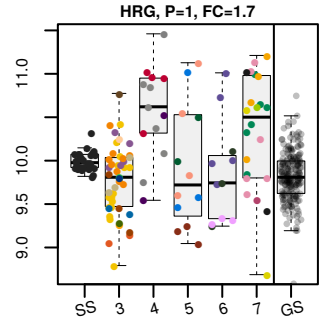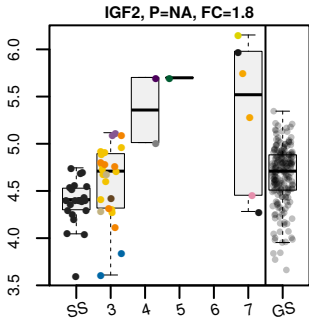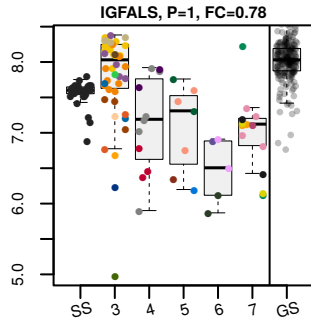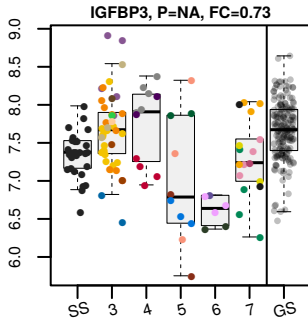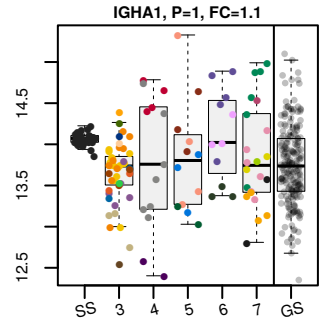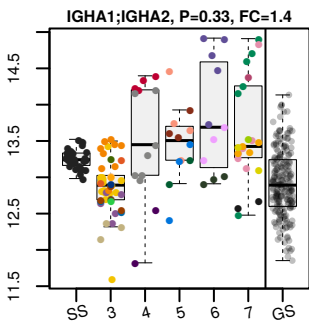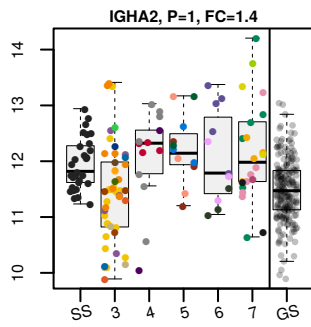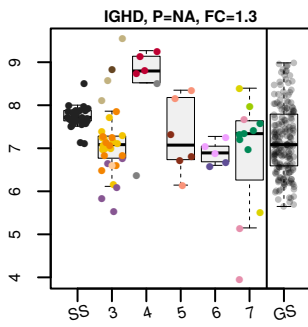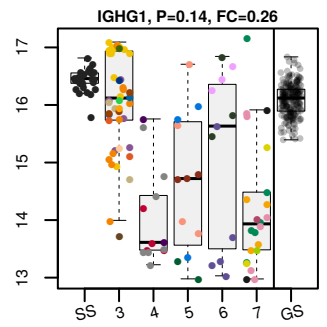

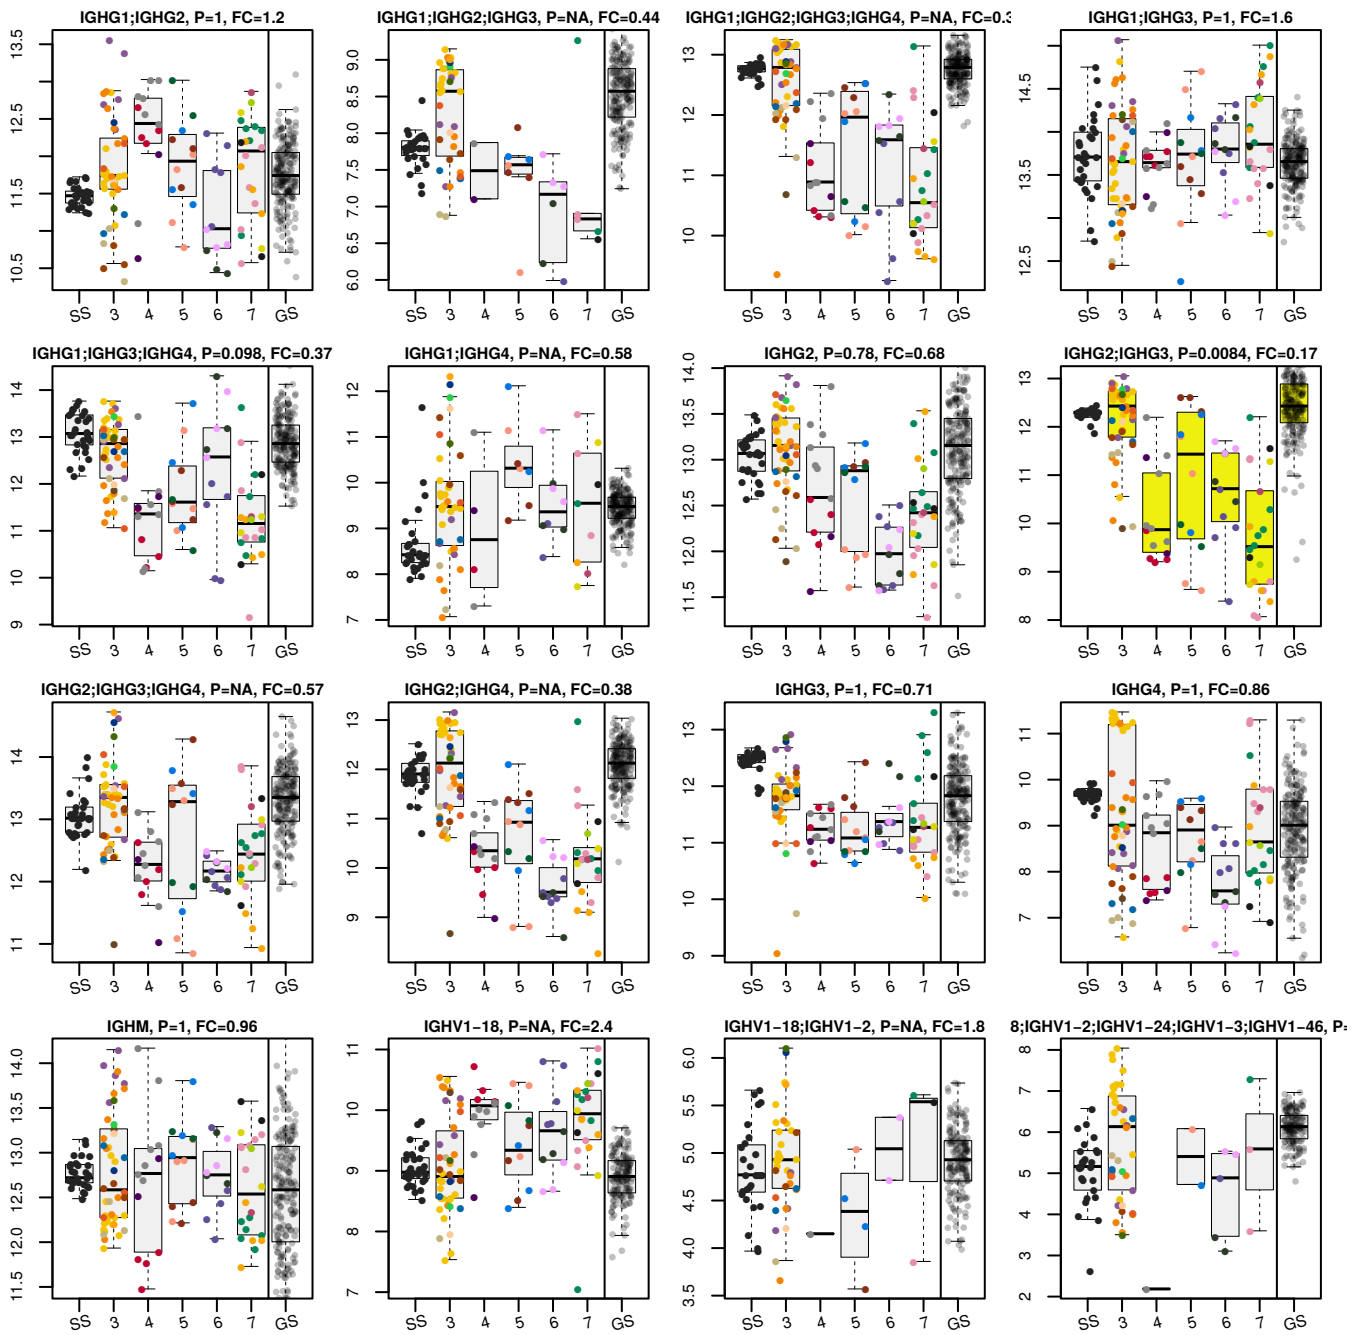

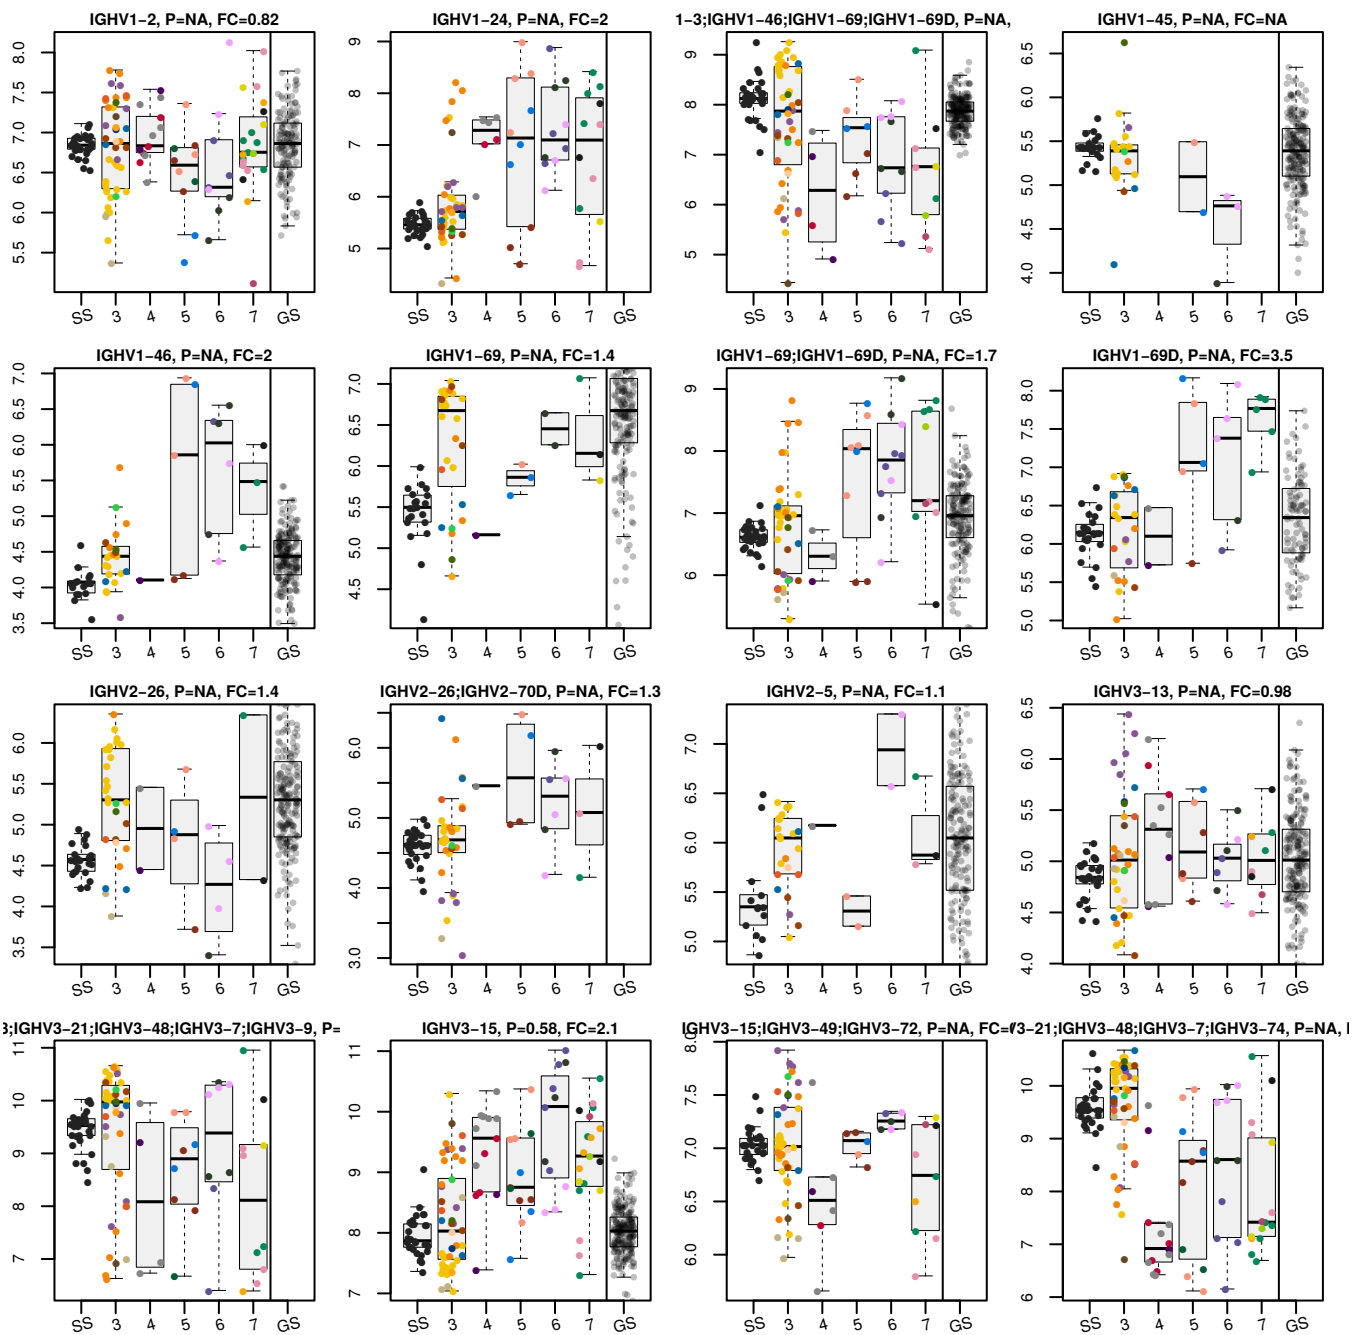



1:IGHV3-48;IGHV3-7;IGHV3-74;IGHV3-9, PV3-21;IGHV3-48;IGHV3-7;IGHV3-9, P=NA, F

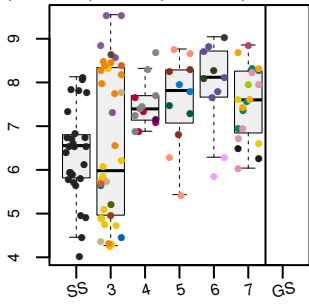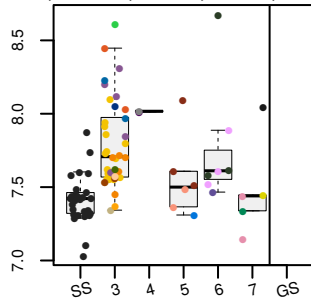

IGHV3-23, P=NA, FC=1.2

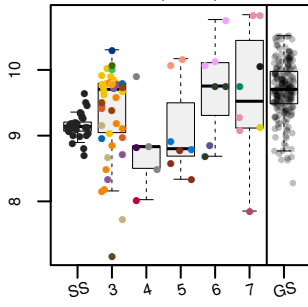

IGHV3-23;IGHV3-74, P=NA, FC=0.72

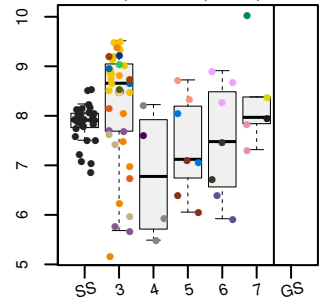

IGHV3-30;IGHV3-30-5, P=NA, FC=0.9

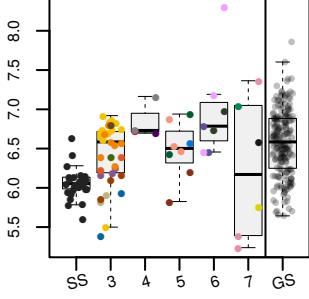

IGHV3-43;IGHV3-43D, P=NA, FC=0.86

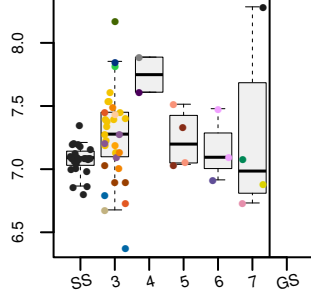

IGHV3-49, P=NA, FC=0.28

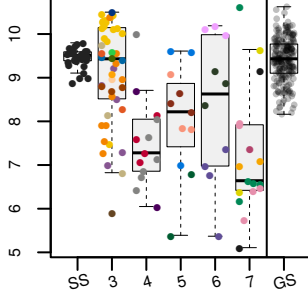

IGHV3-64, P=NA, FC=1.4

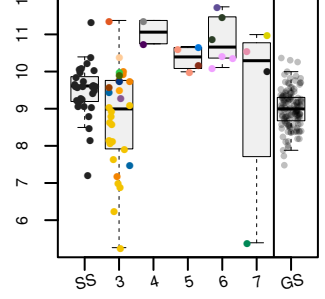

IGHV3-64D, P=NA, FC=1

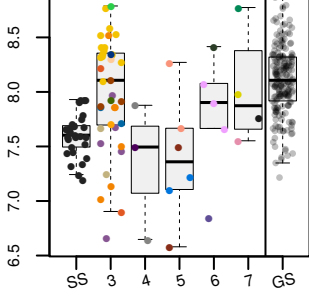

IGHV3-7, P=NA, FC=0.56

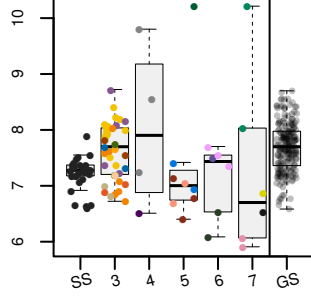

IGHV3-72, P=NA, FC=0.55

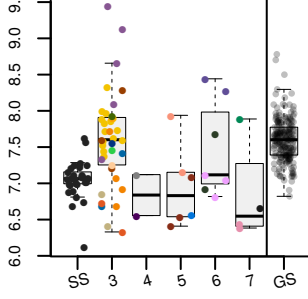

IGHV3-74, P=NA, FC=0.91

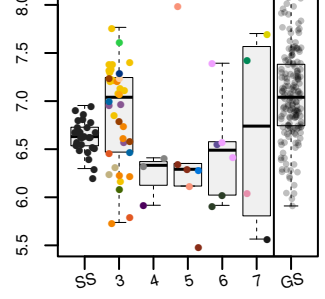

IGHV3-9, P=NA, FC=0.99

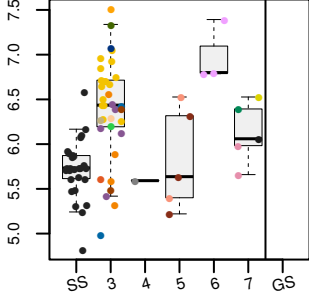

IGHV4-28, P=NA, FC=1.1

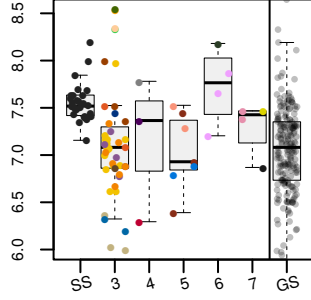

4-34;IGHV4-38-2;IGHV4-39;IGHV4-59;IGHV4-4, P=NA, FC=0.93

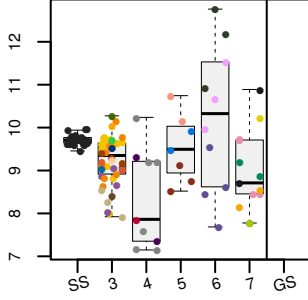

IGHV4-4, P=NA, FC=0.93

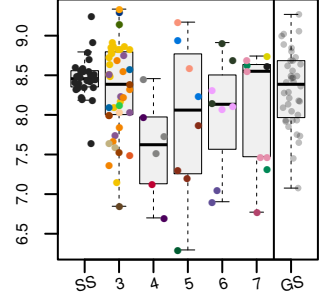

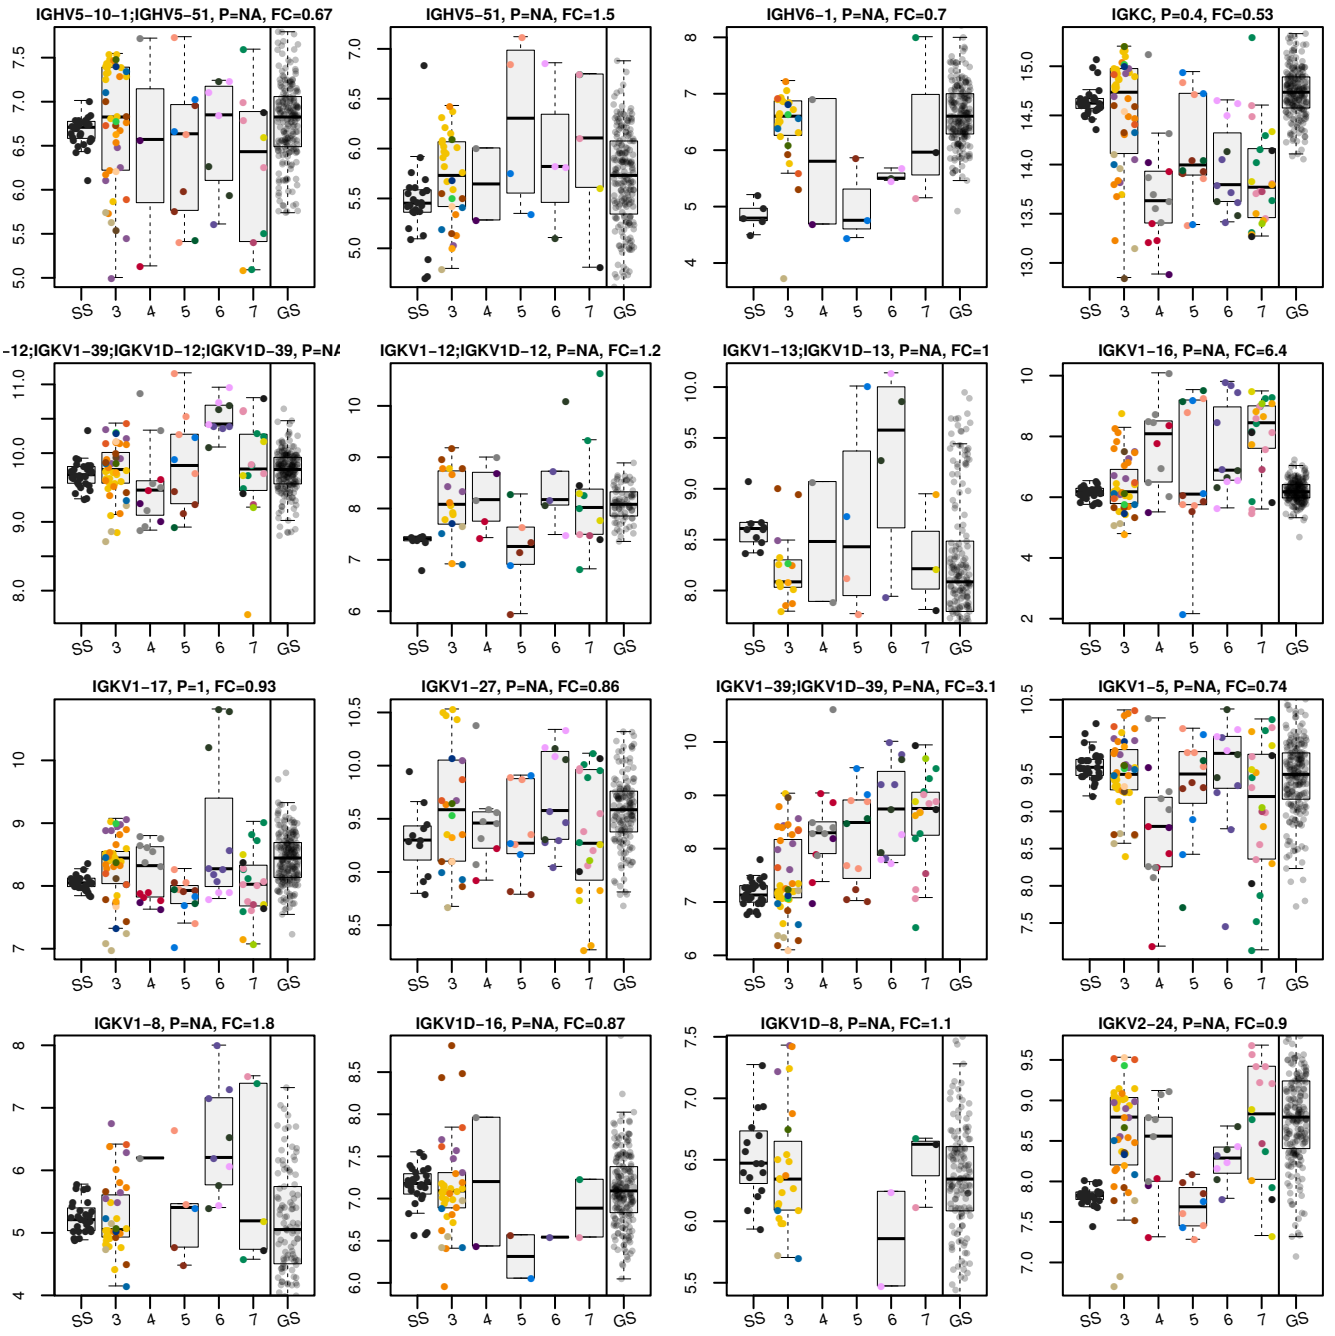

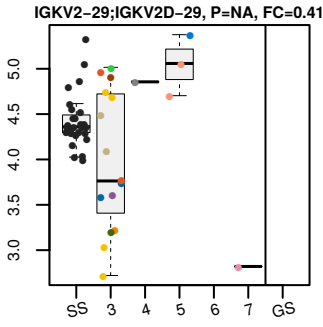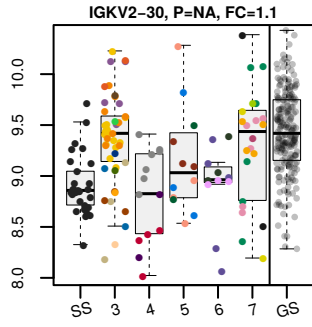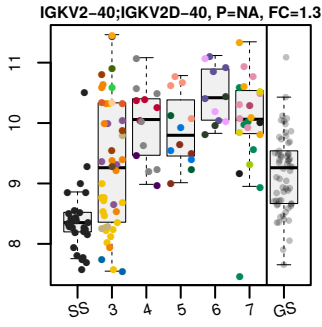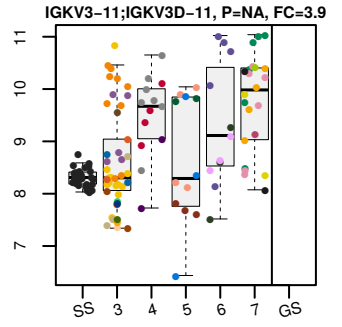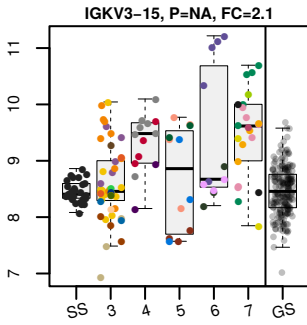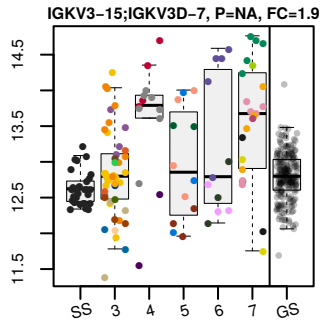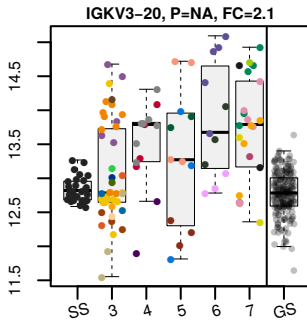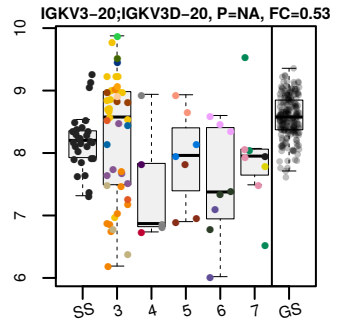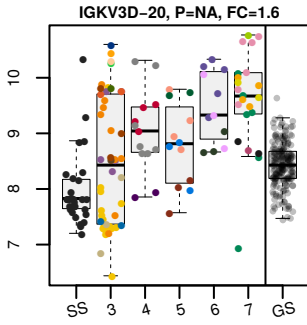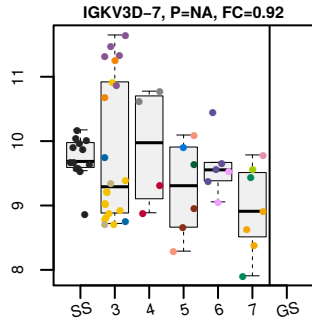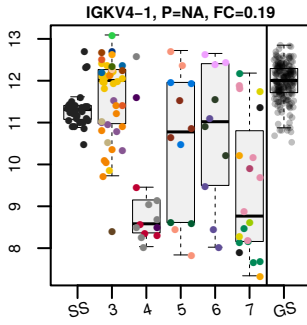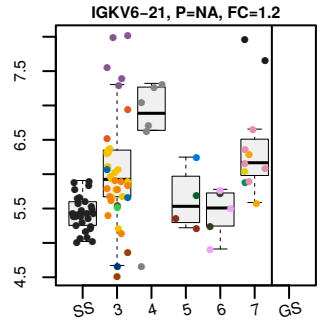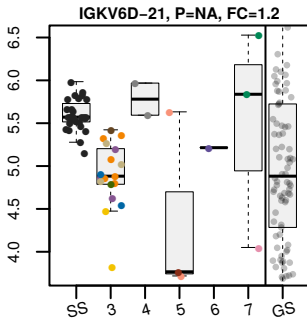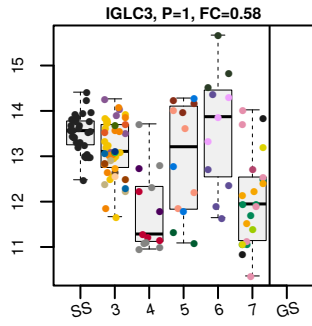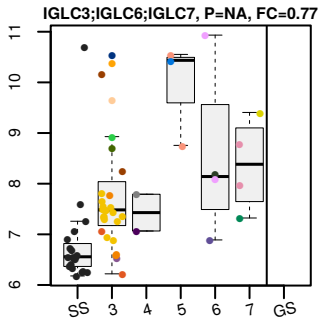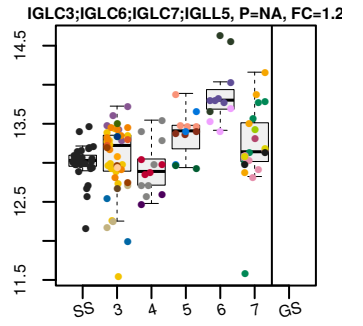

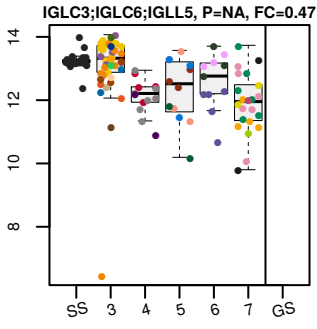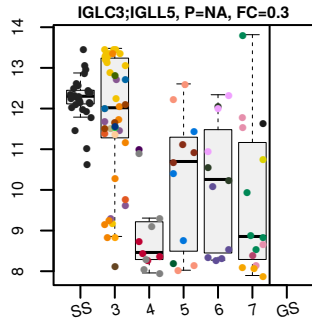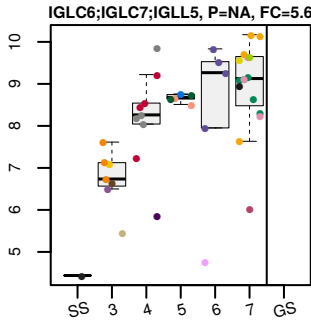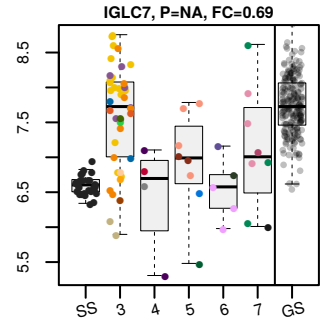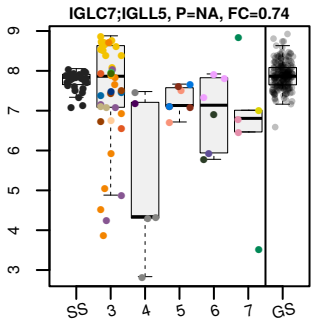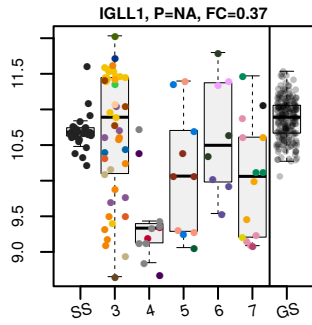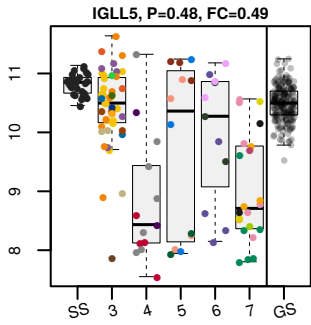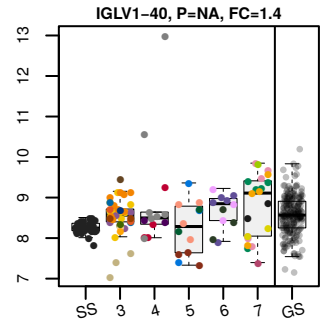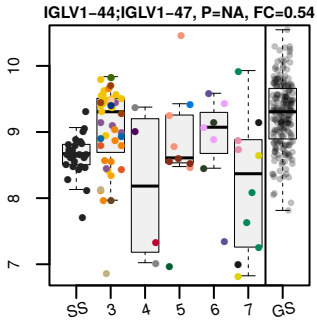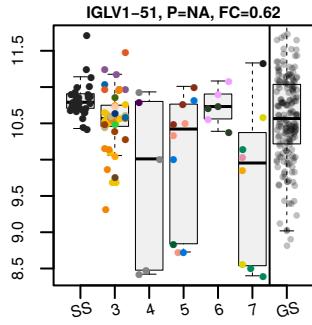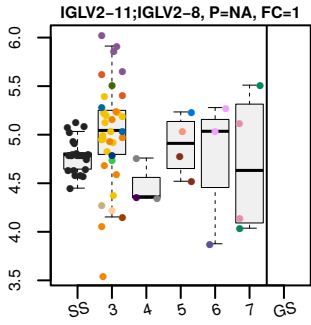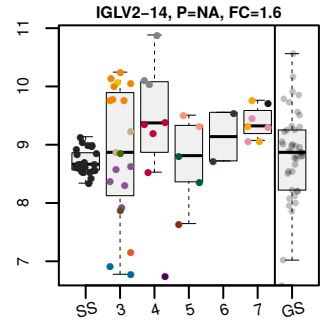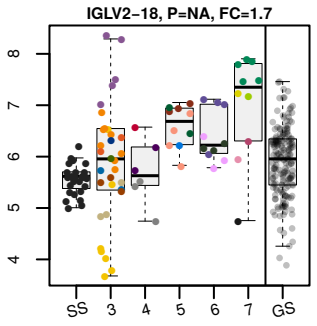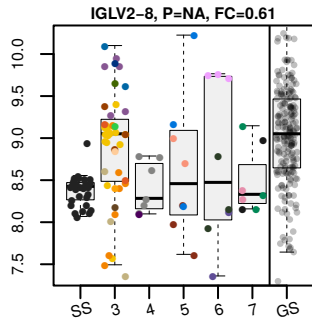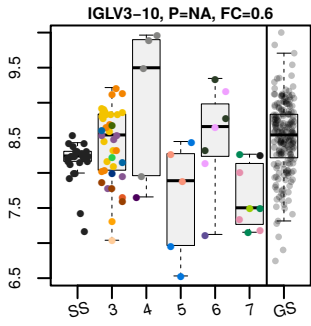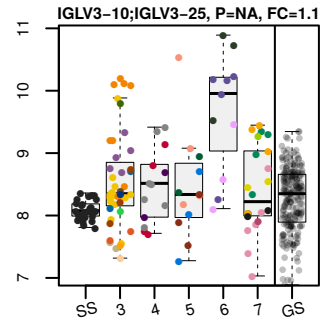

IGLV3-16;IGLV3-25;IGLV3-27, P=NA, FC=3

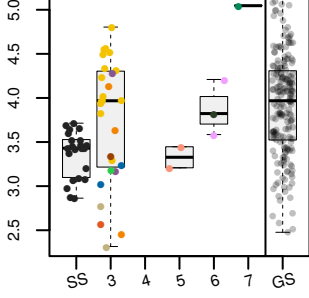

IGLV3-19, P=NA, FC=1.2

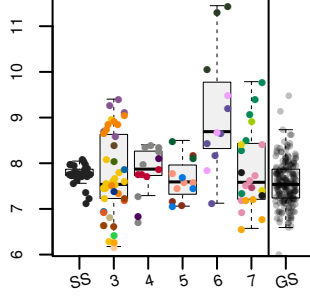

IGLV3-21, P=NA, FC=1.3

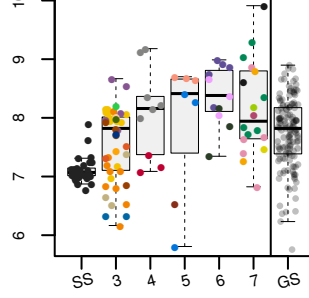

IGLV3-21;IGLV3-9, P=NA, FC=0.83

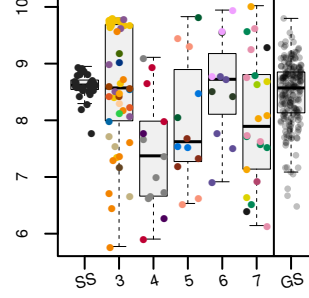

IGLV3-9, P=NA, FC=0.89

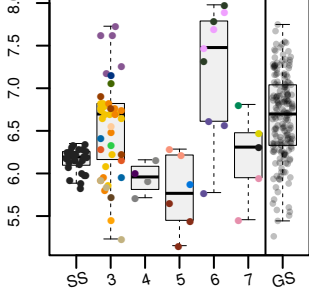

IGLV4-60, P=NA, FC=3.5

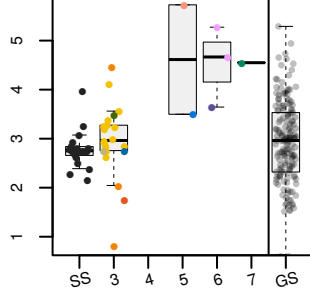

IGLV4-69, P=NA, FC=0.84

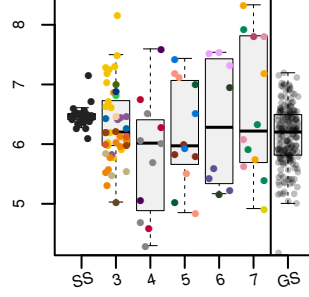

IGLV5-45, P=NA, FC=1.9

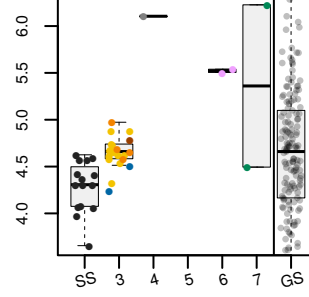

IGLV7-46, P=NA, FC=1.3

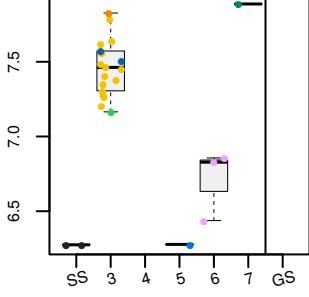

IGLV8-61, P=NA, FC=1.6

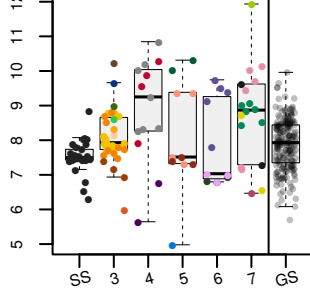

ITIH1, P=1, FC=1

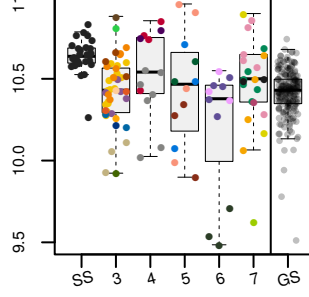

ITIH2, P=1, FC=0.69

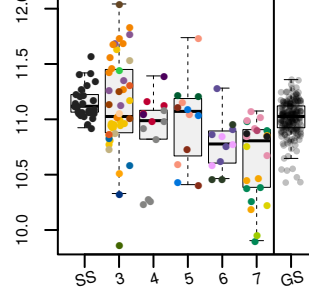

ITIH3, P=0.00012, FC=2

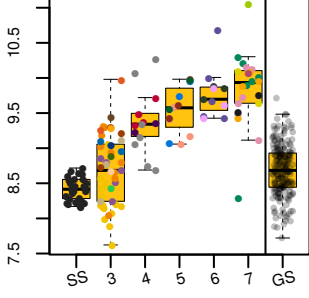

ITIH4, P=8.3e-05, FC=2.3

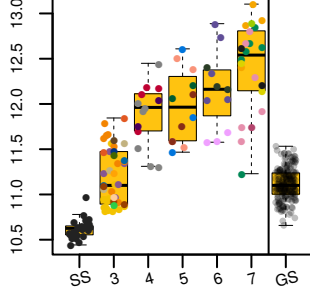

ITPR1, P=NA, FC=1.8

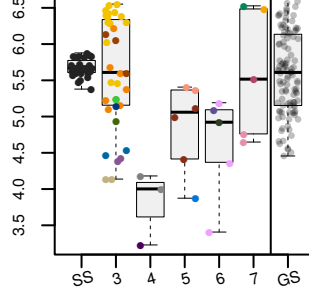

JCHAIN, P=0.78, FC=2.1

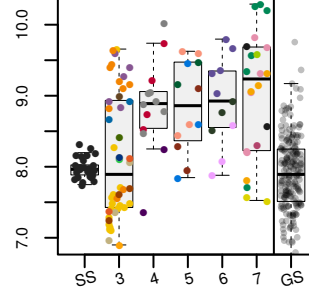

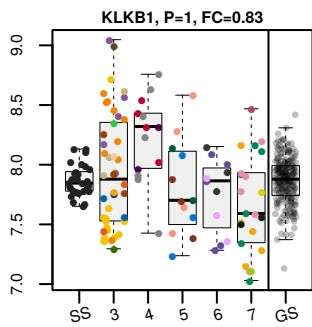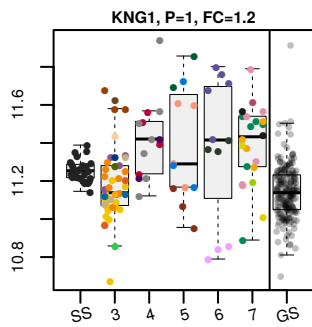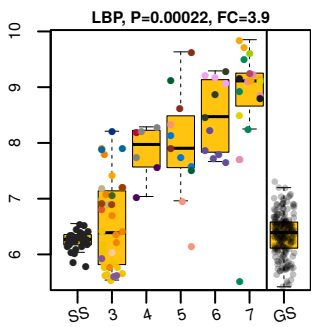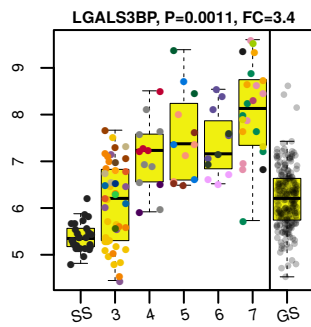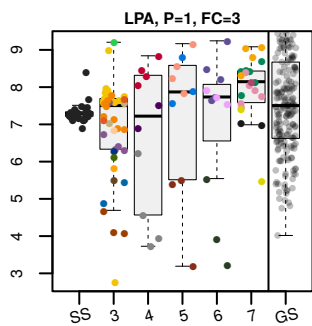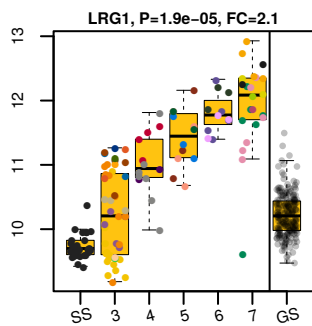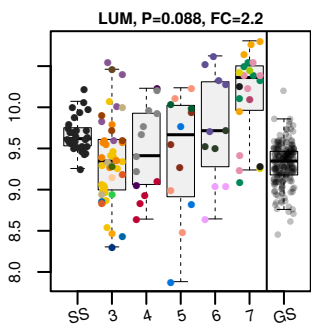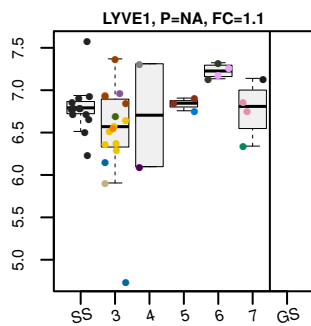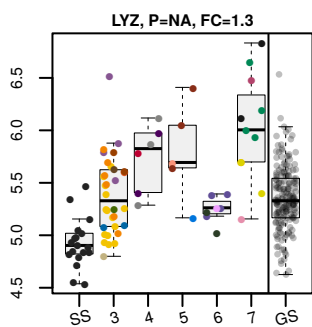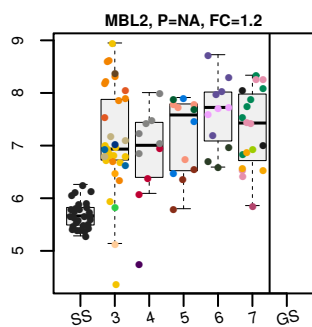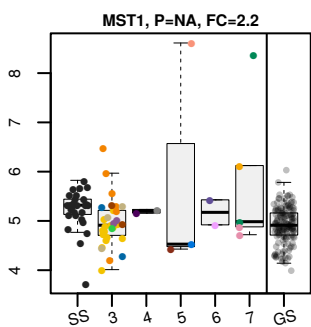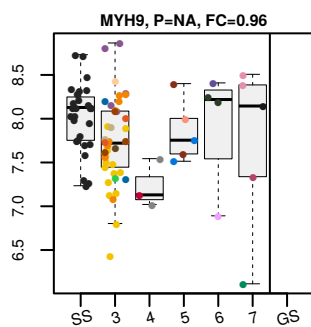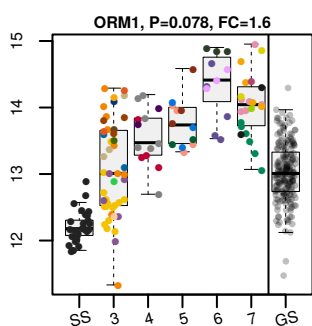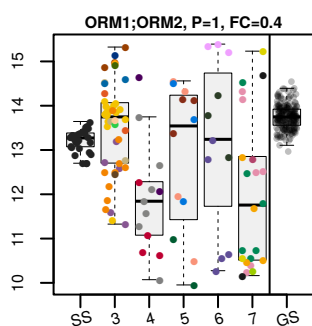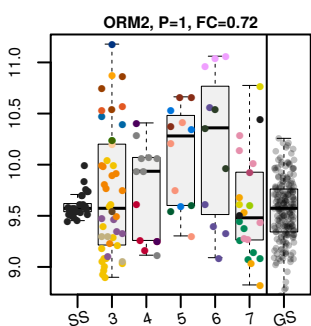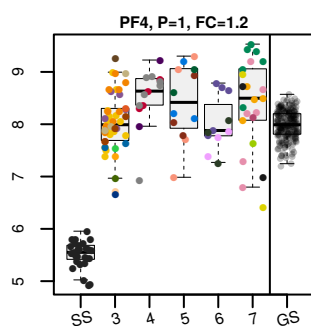

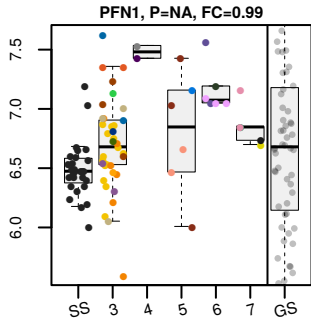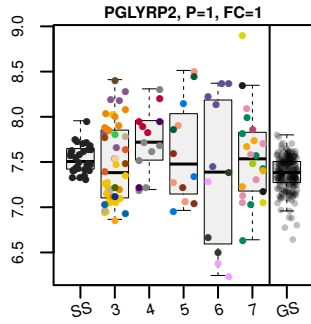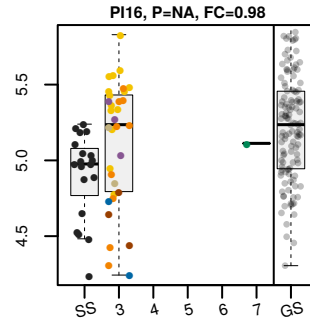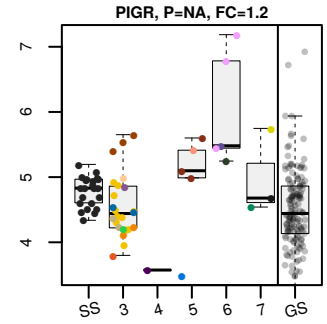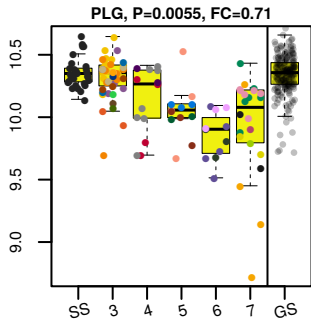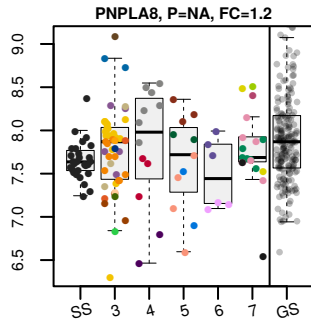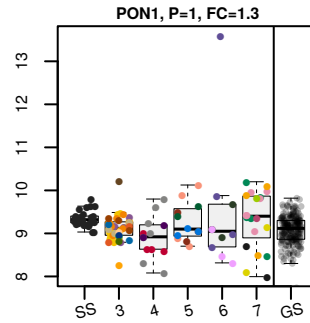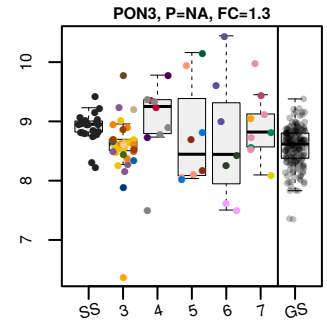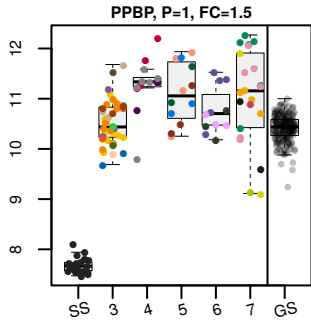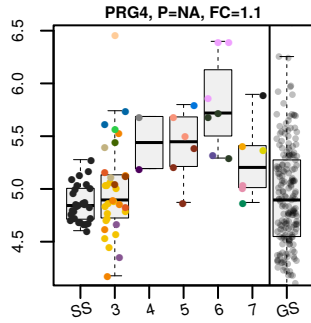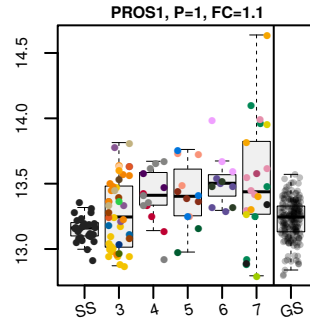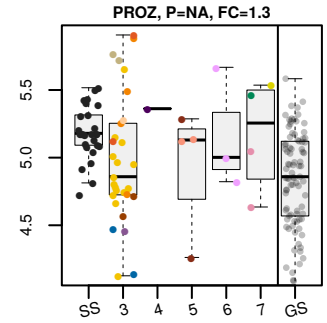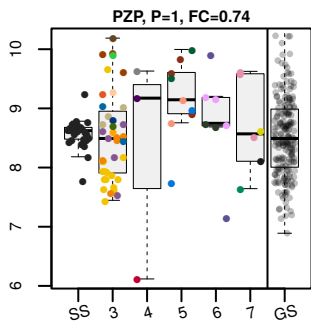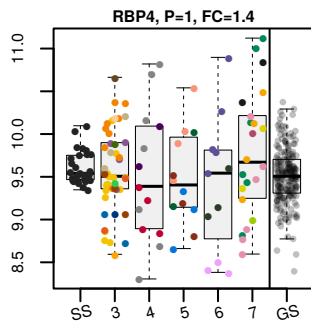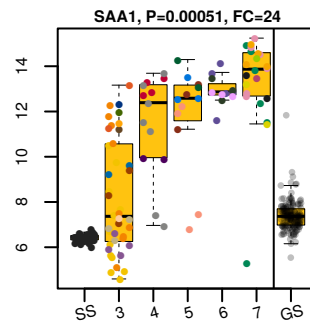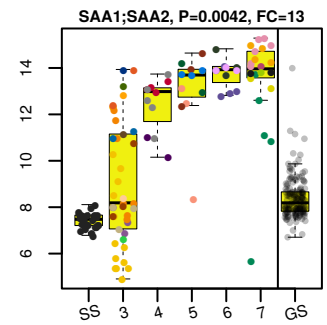

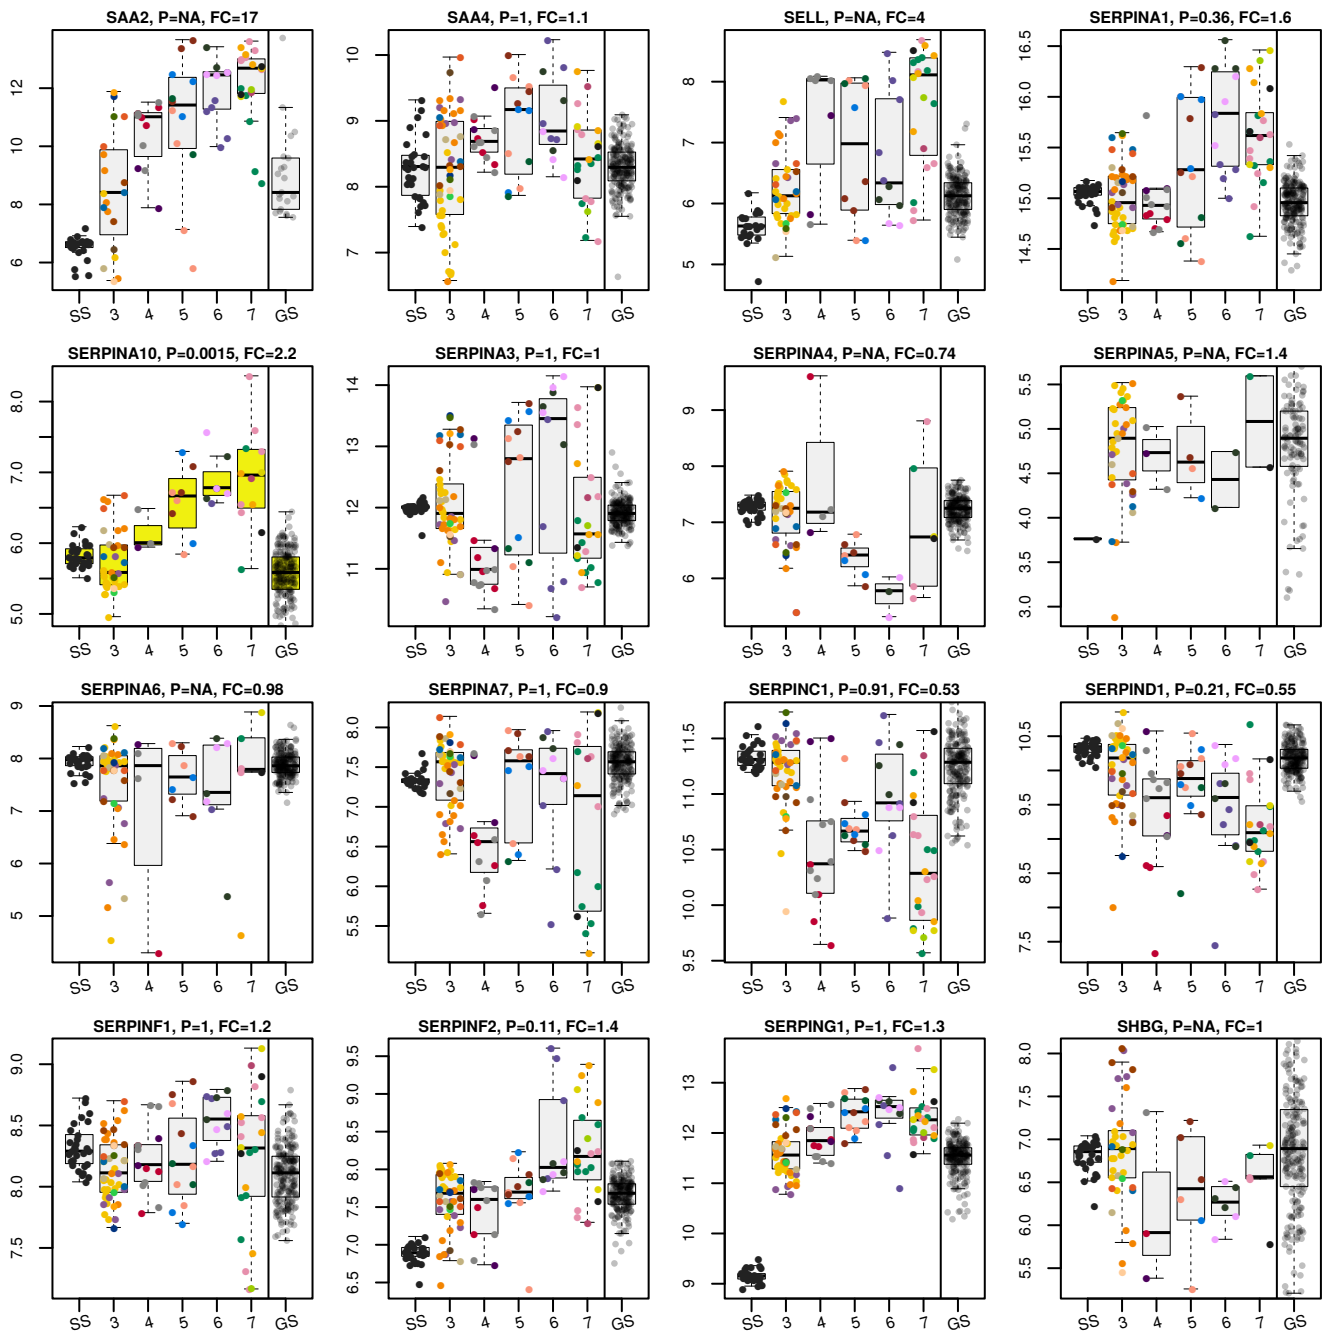



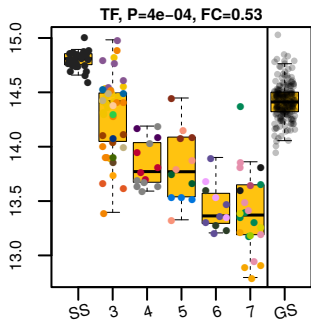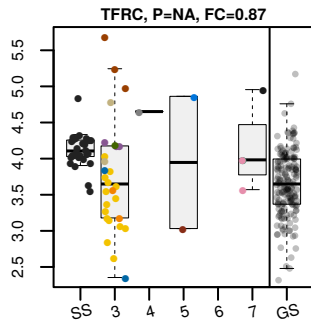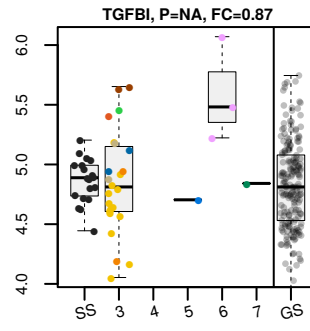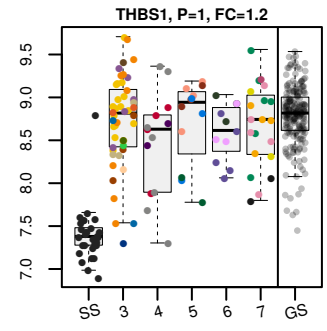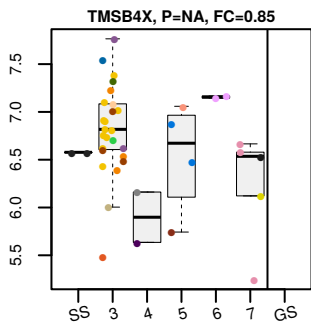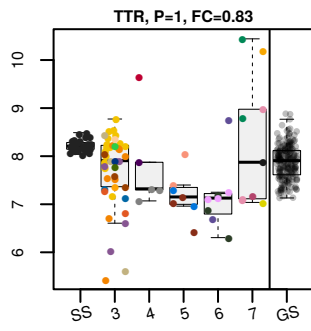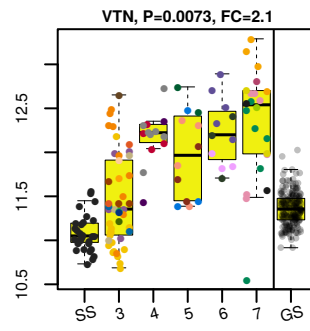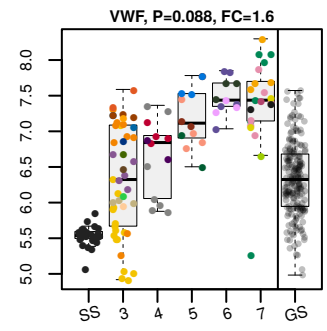

Figure S8 (following 15 pages). **Age-related protein changes in the general population (GS cohort).**

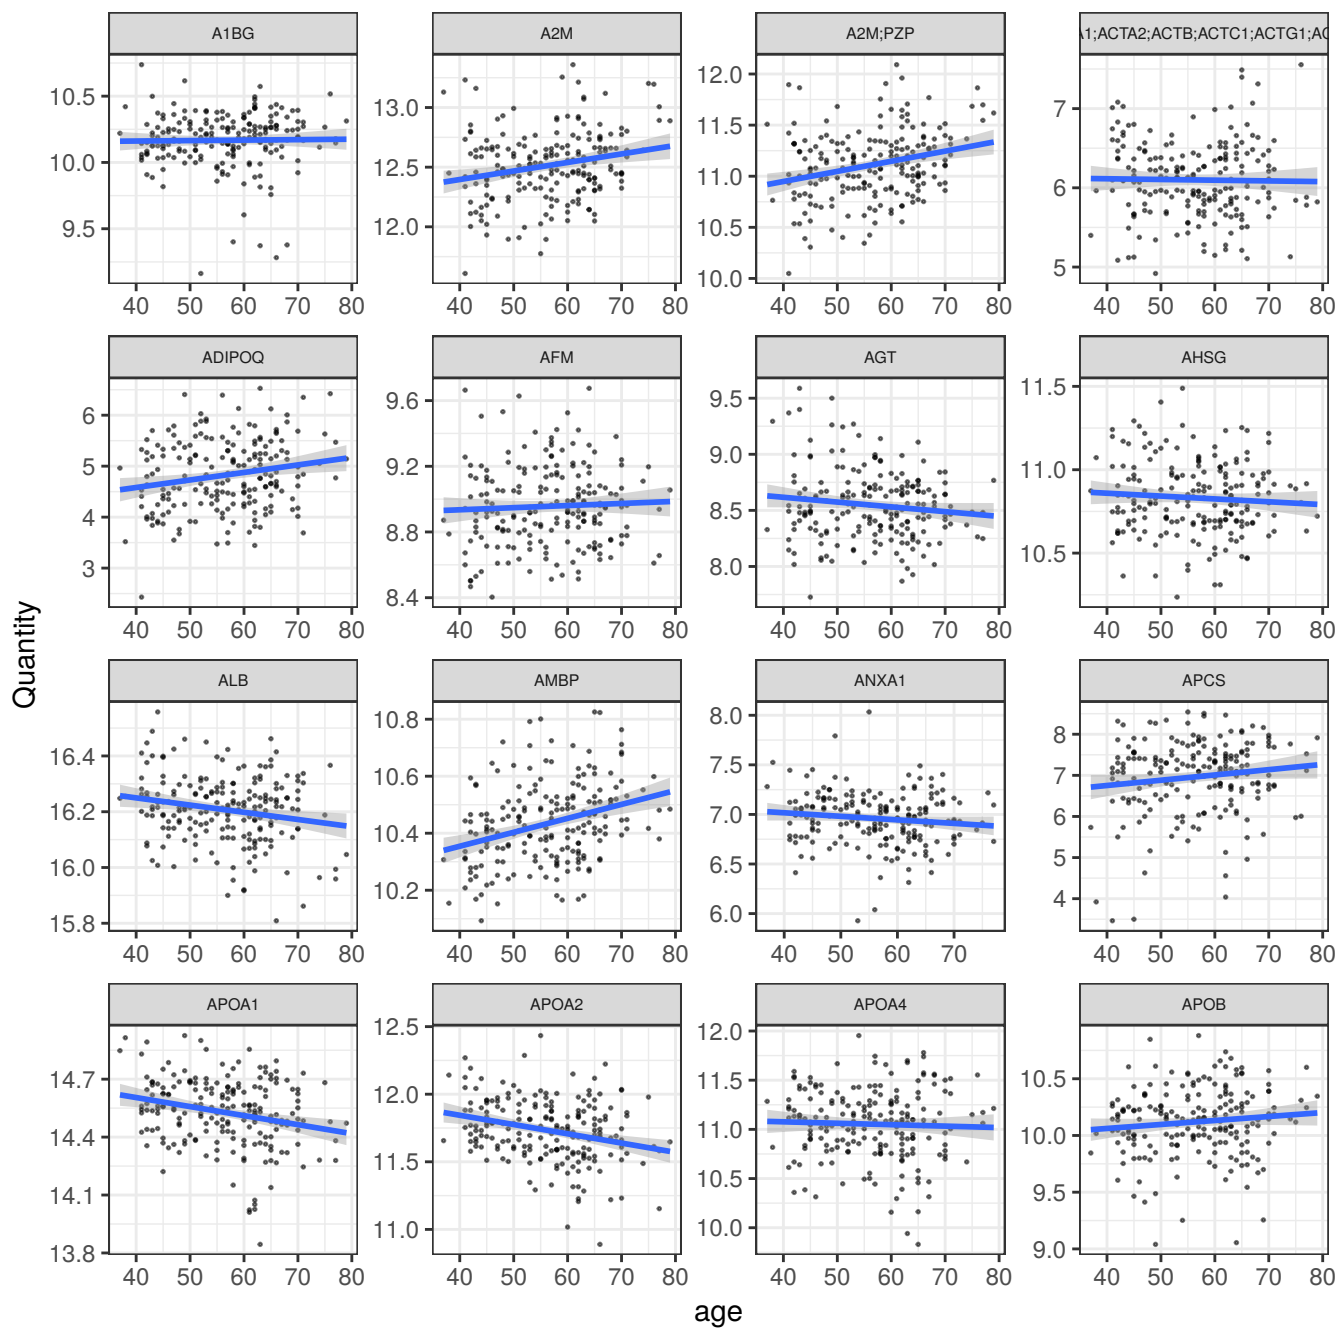

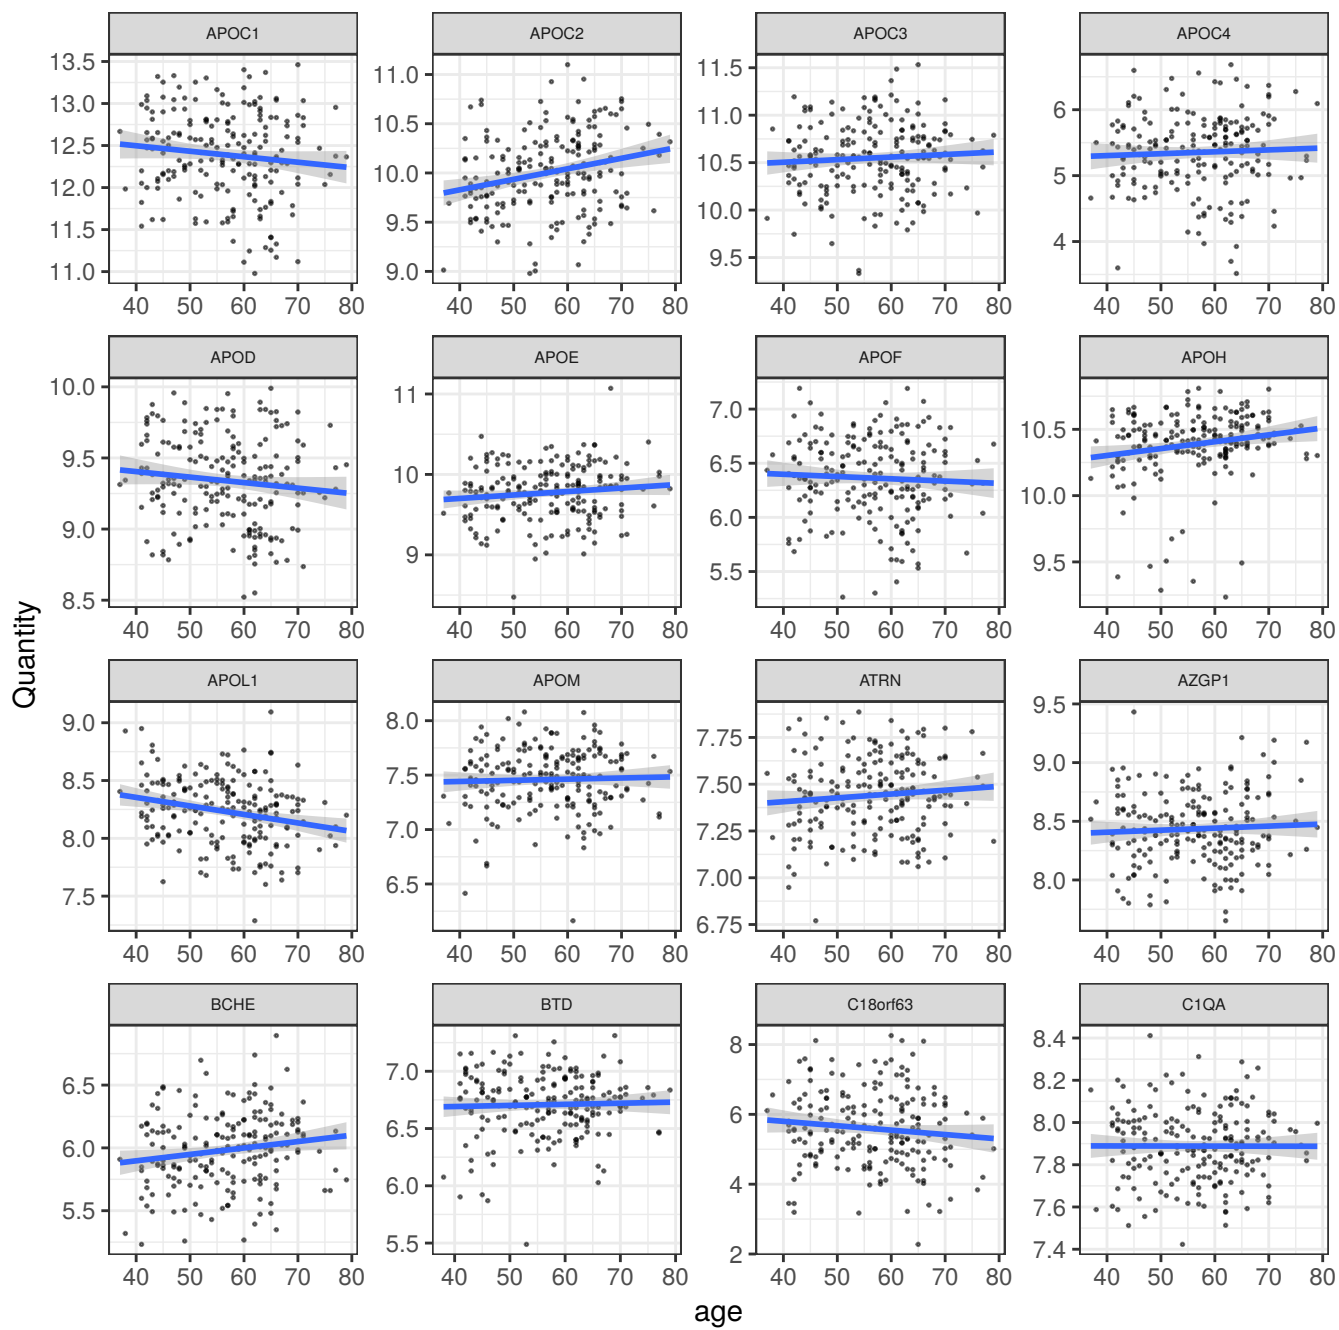

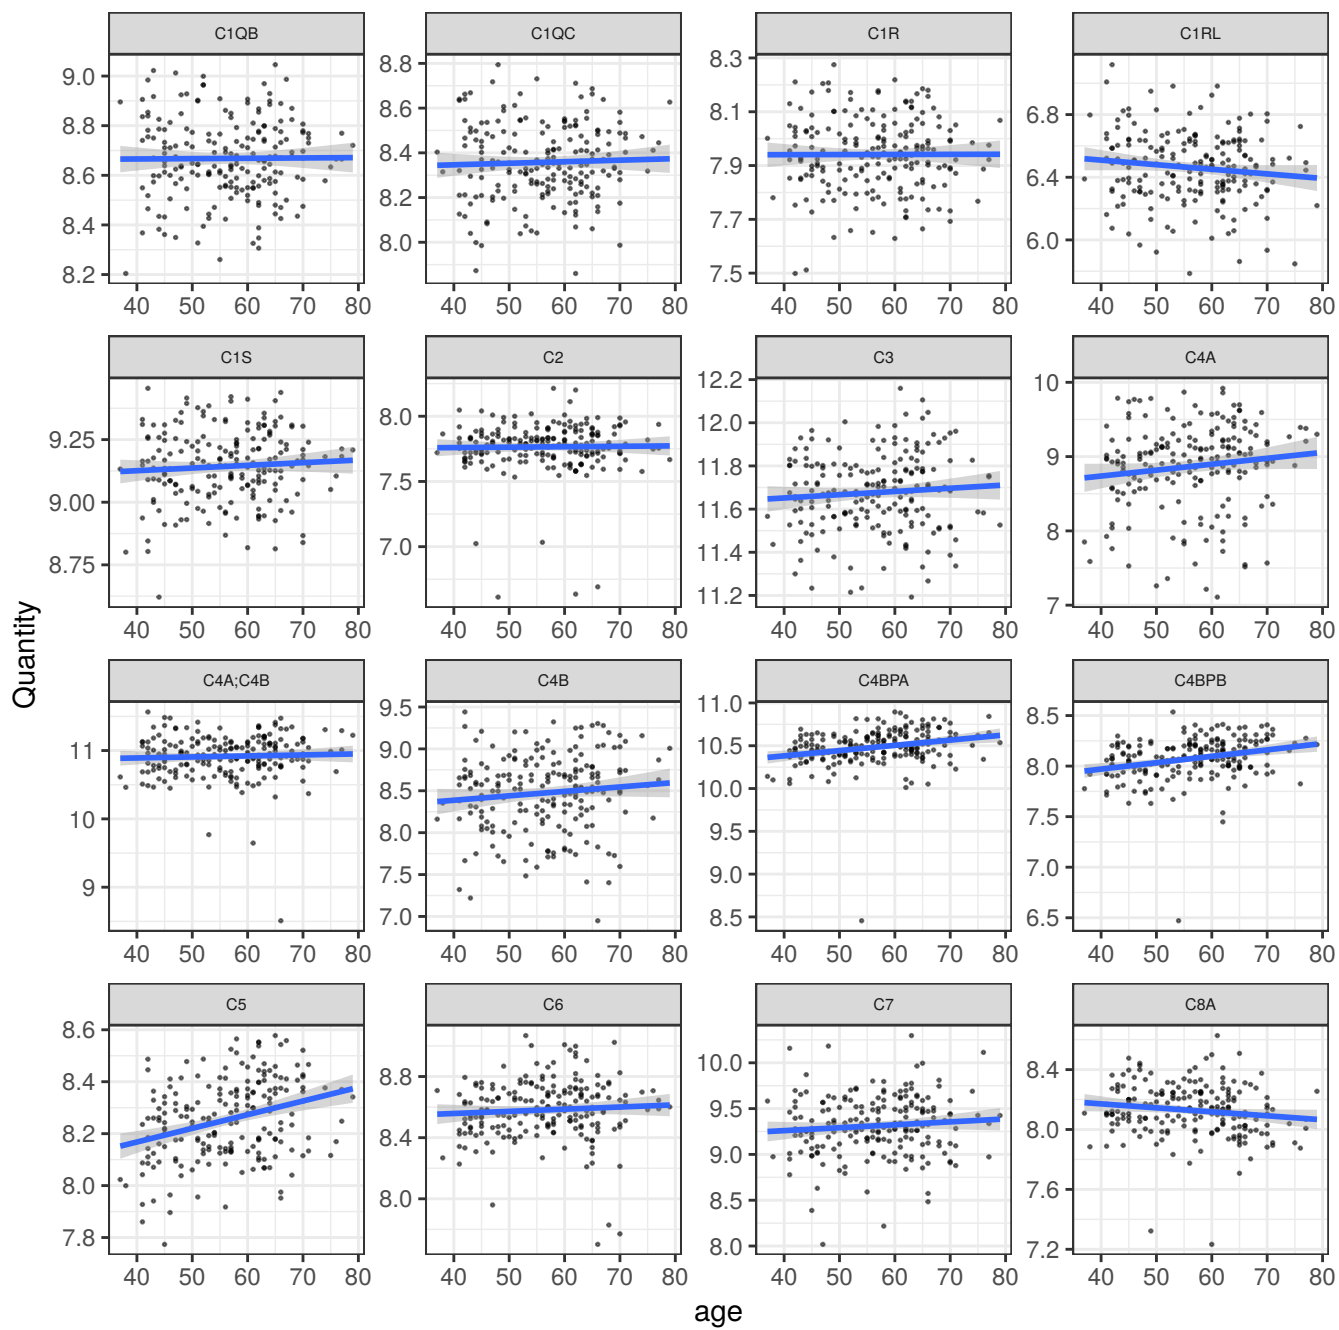

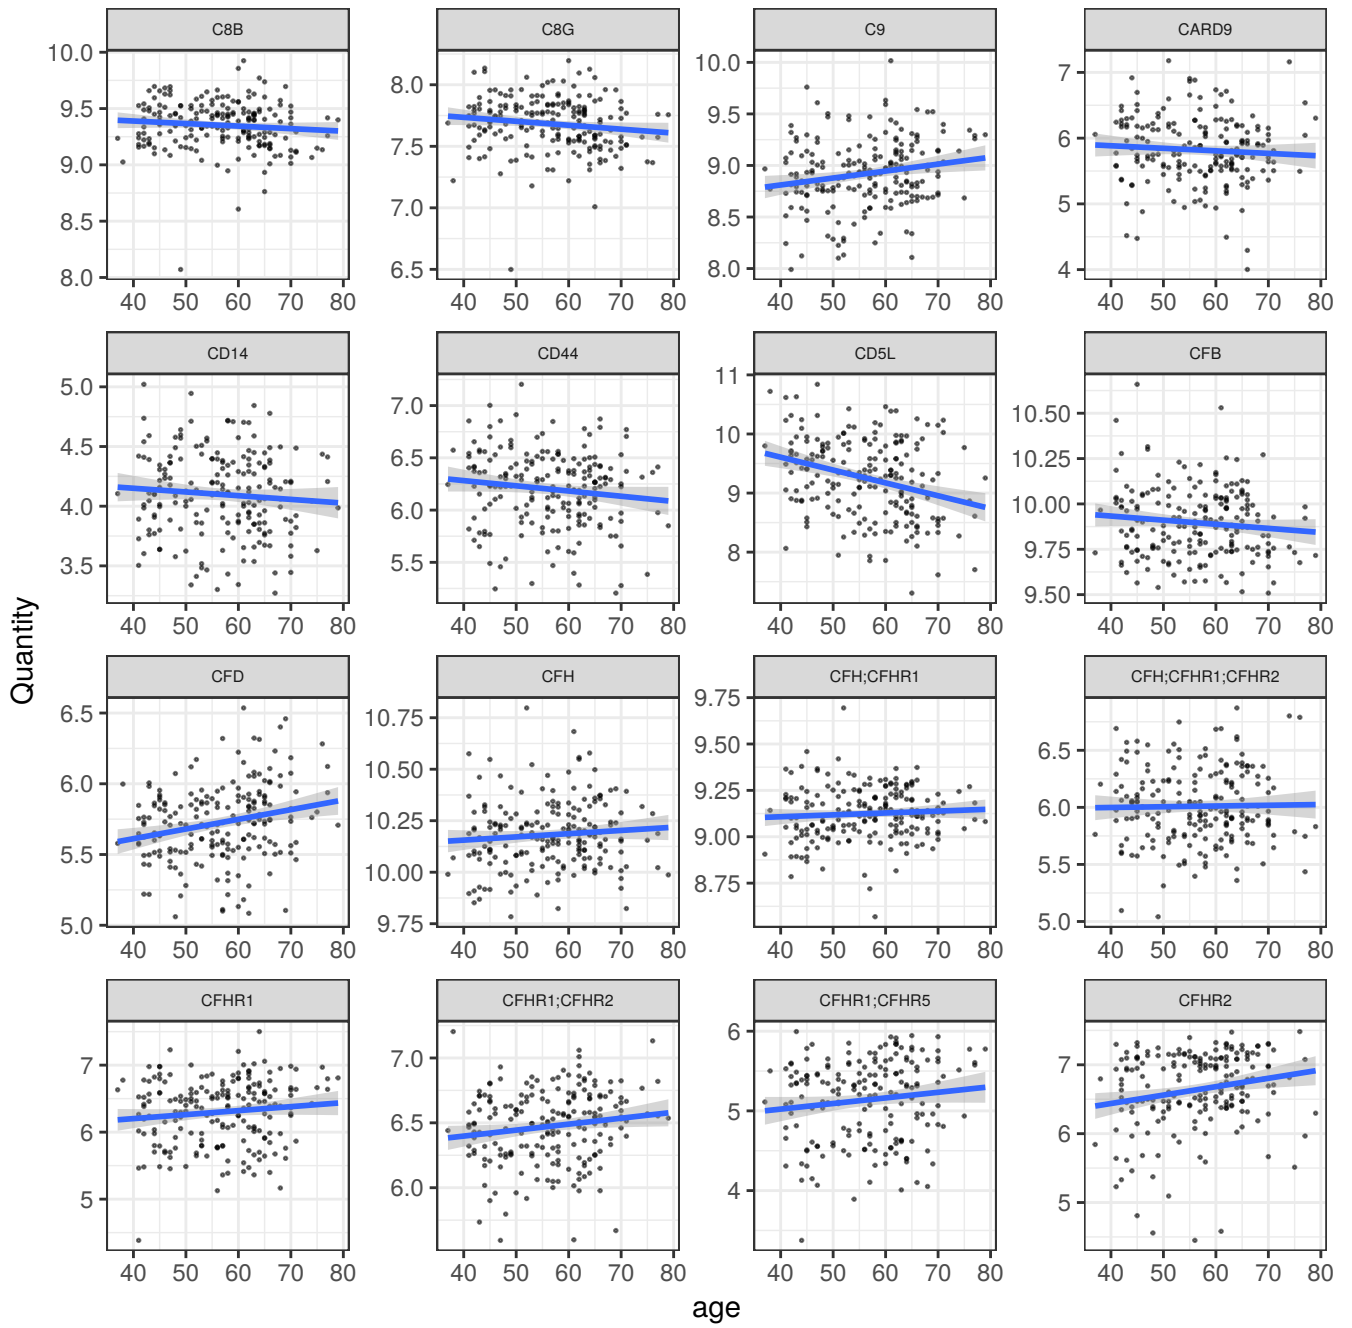

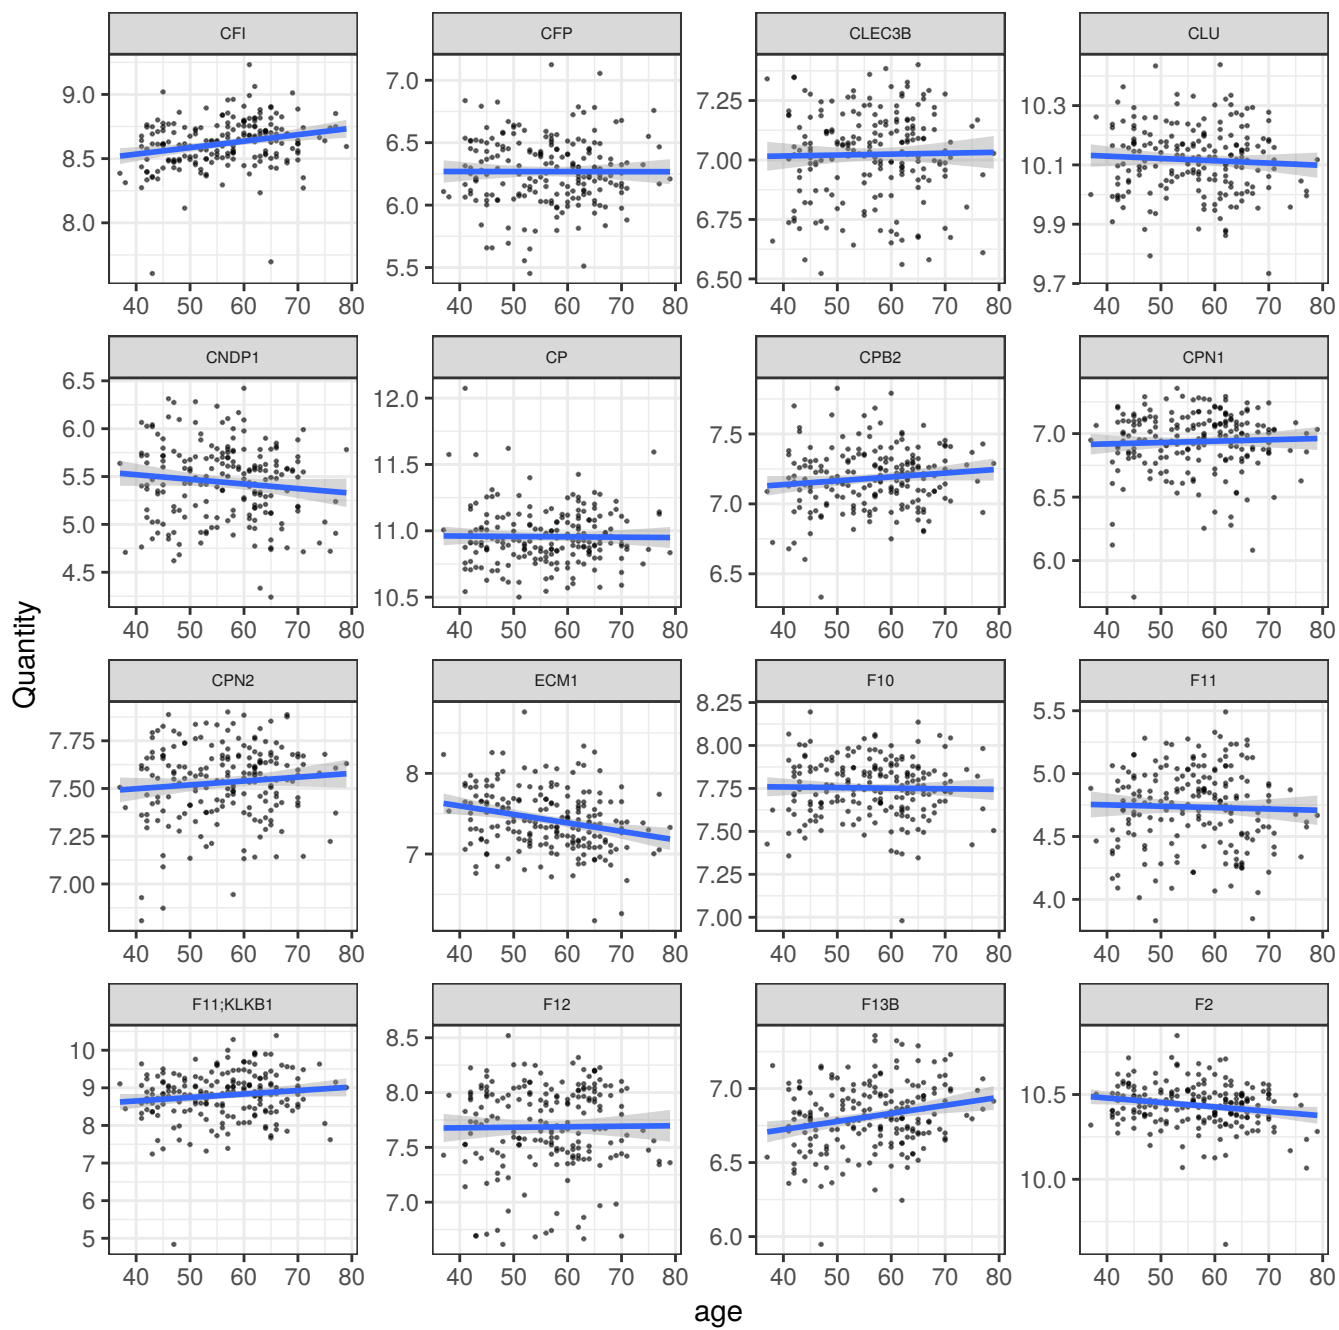

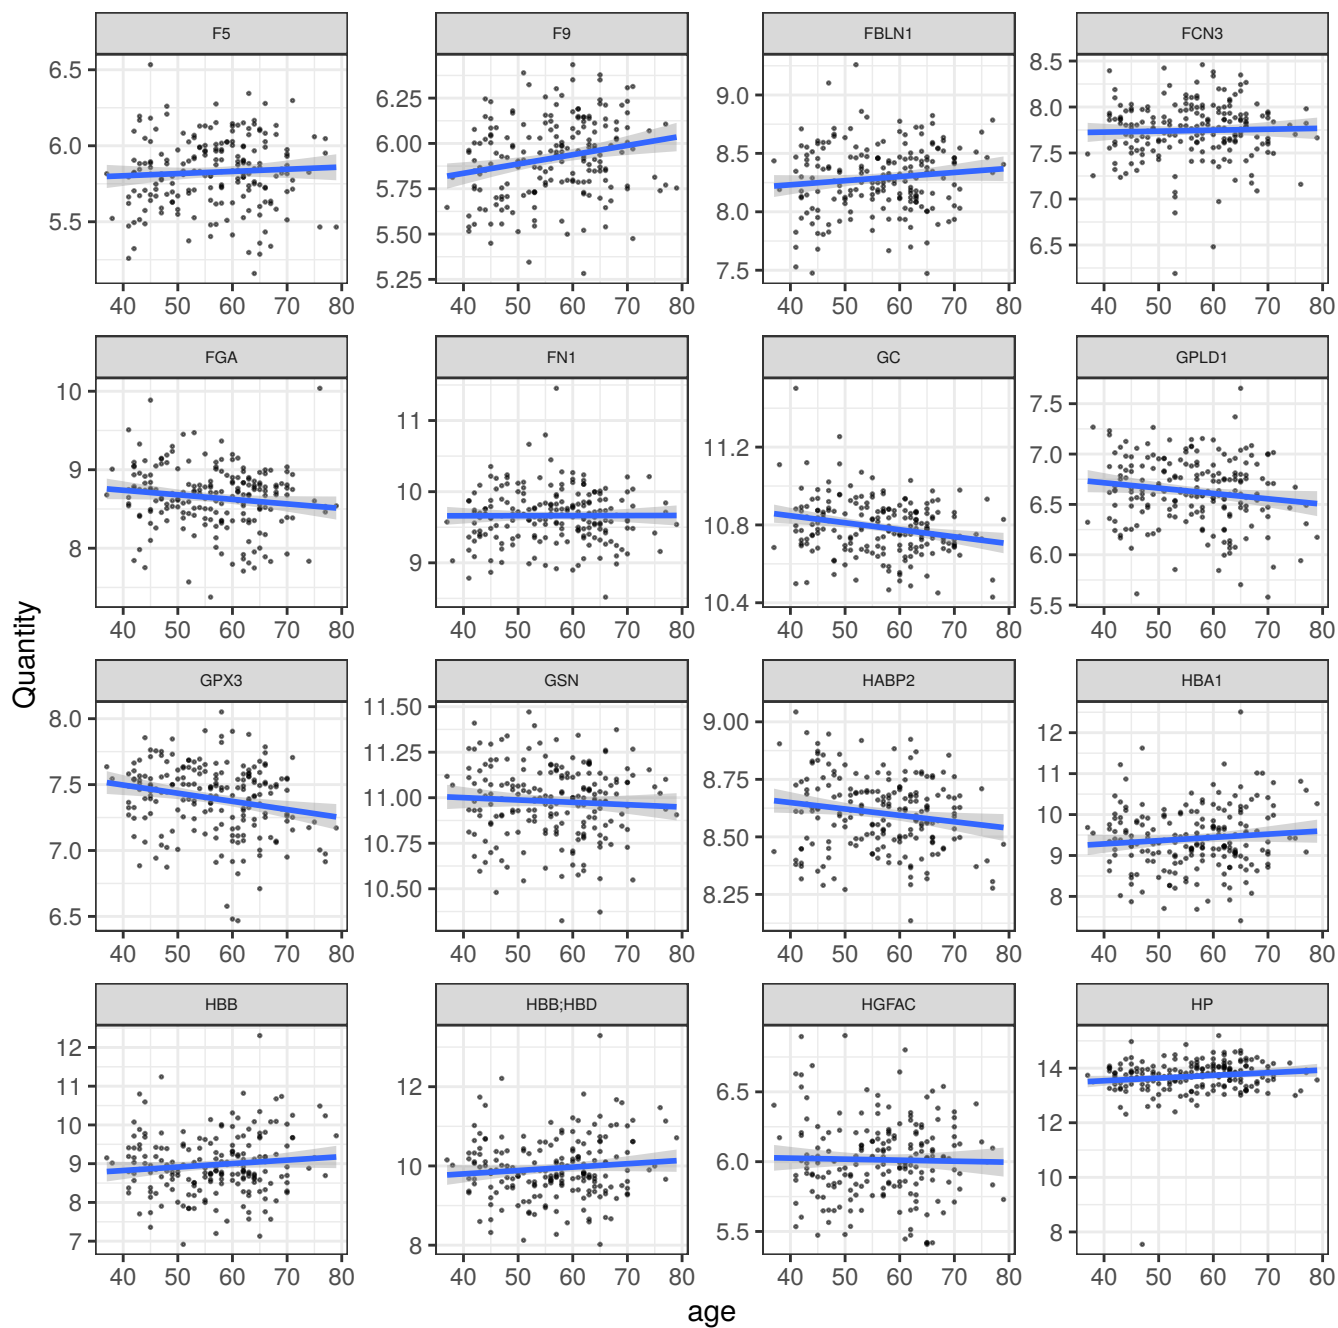



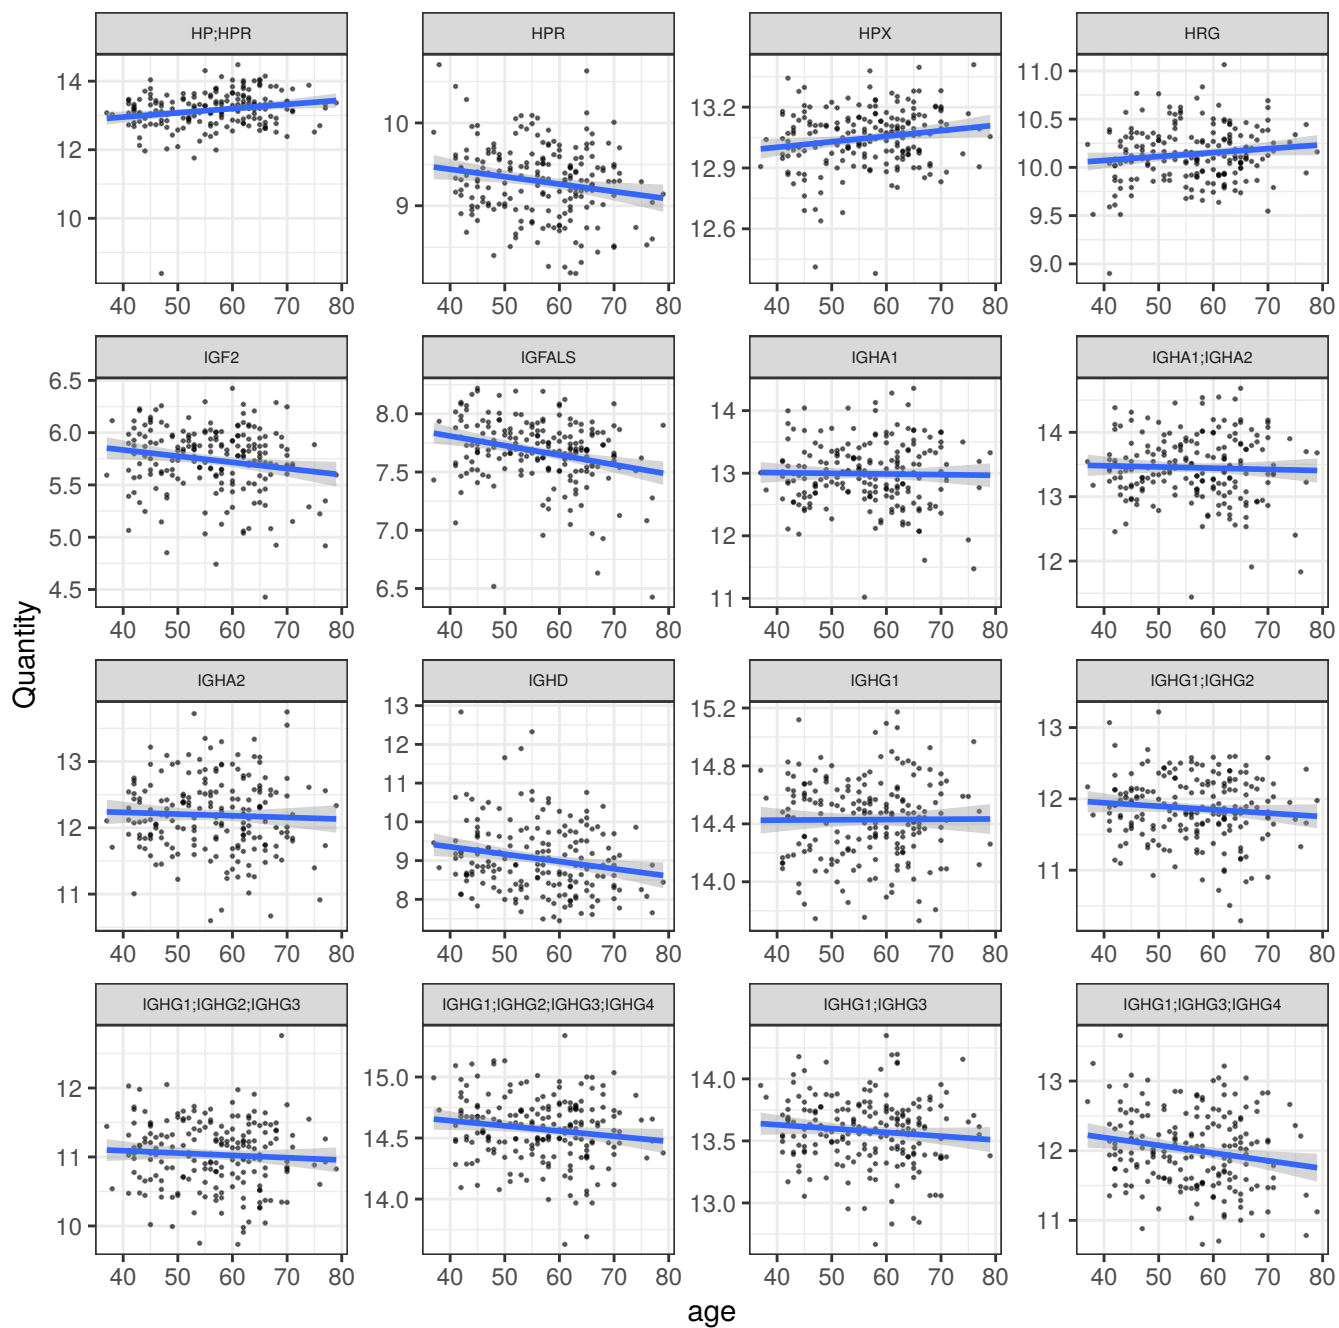

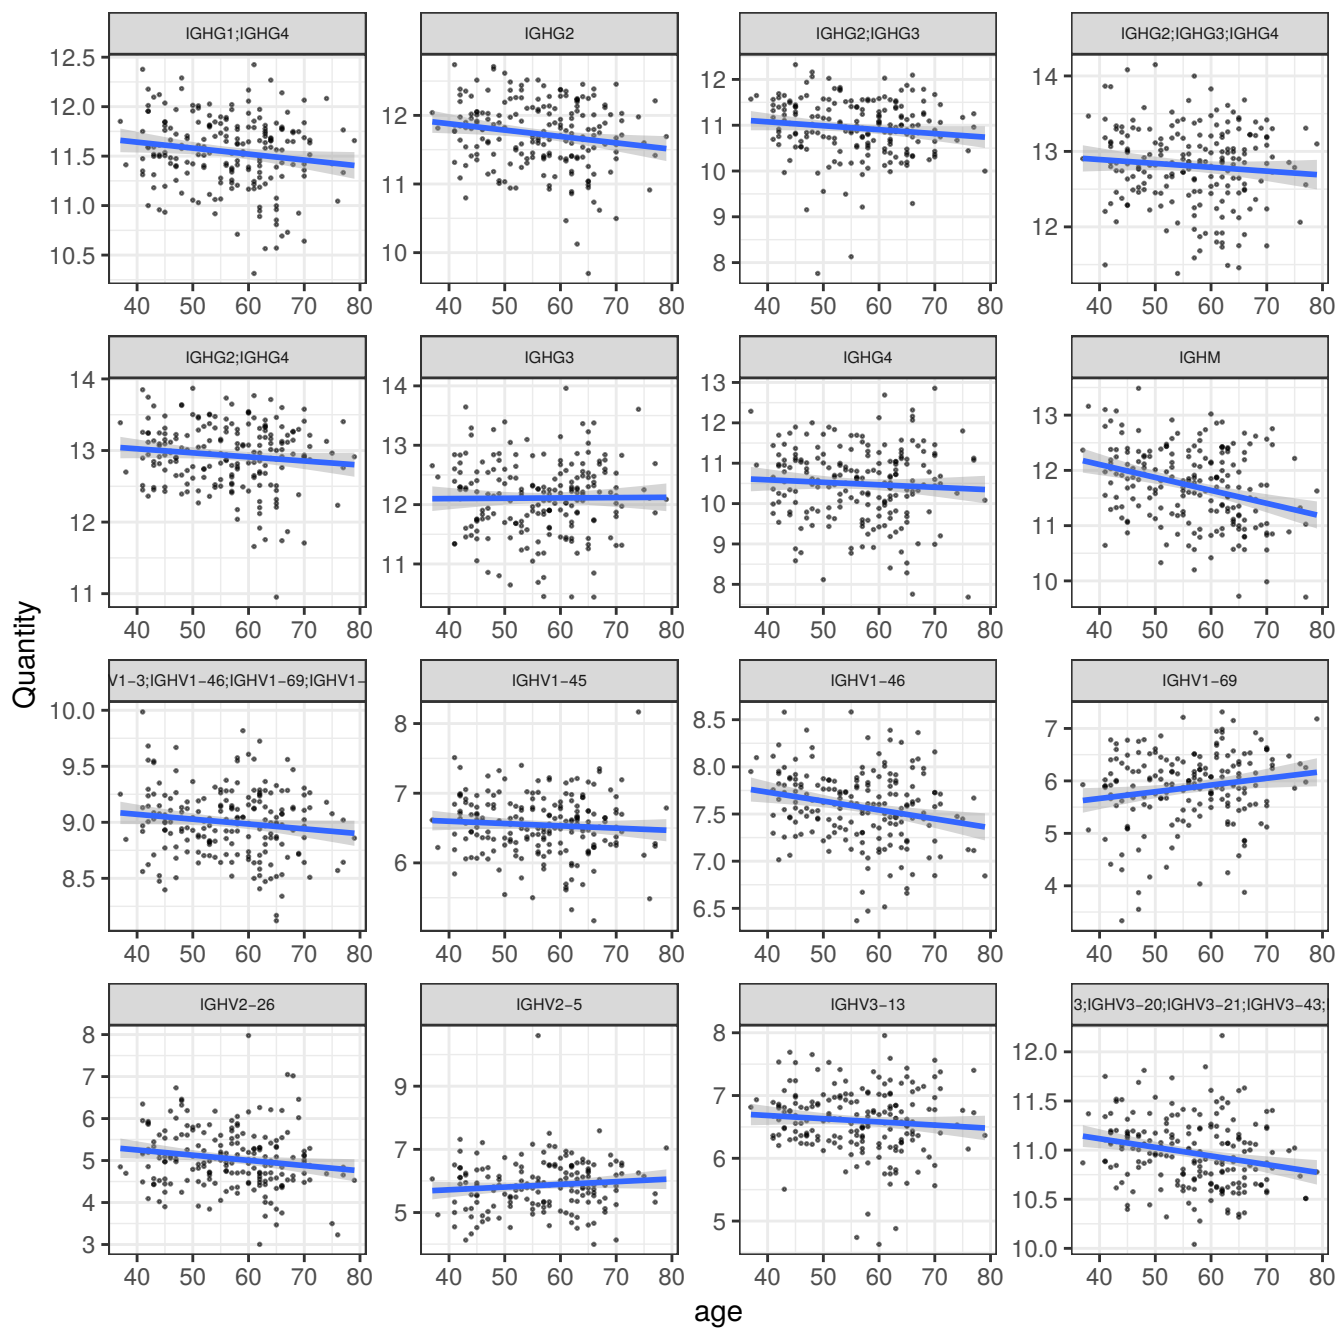

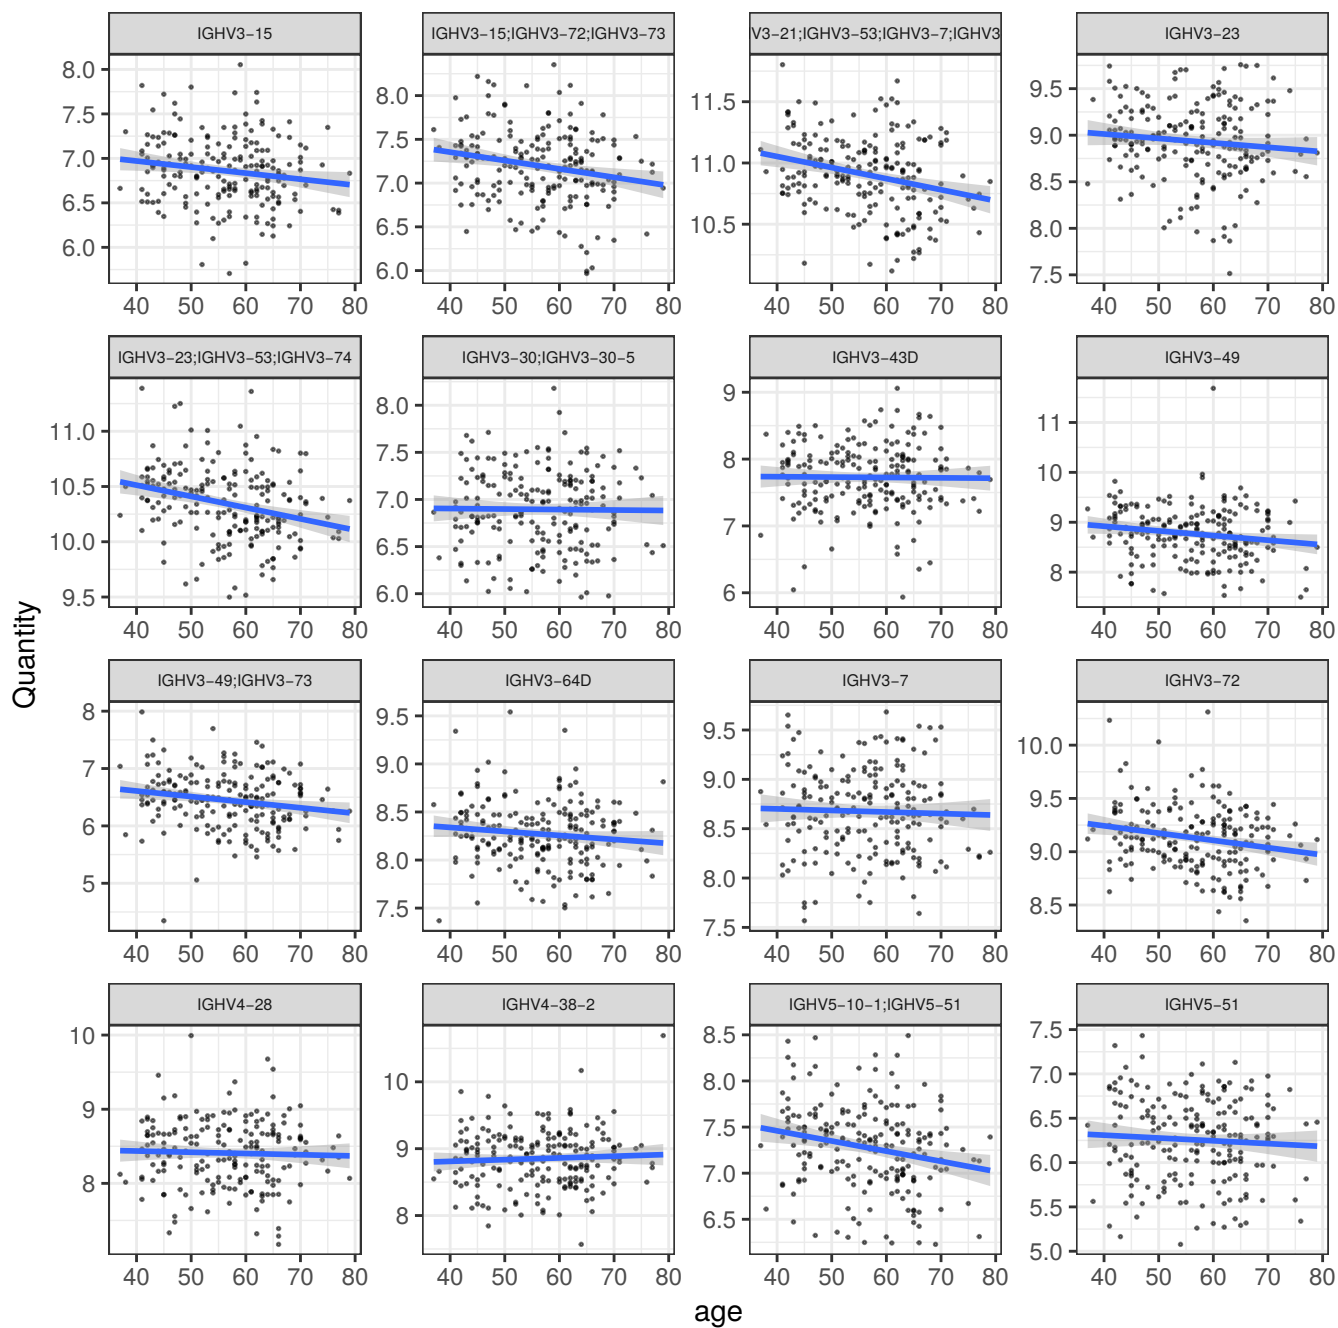

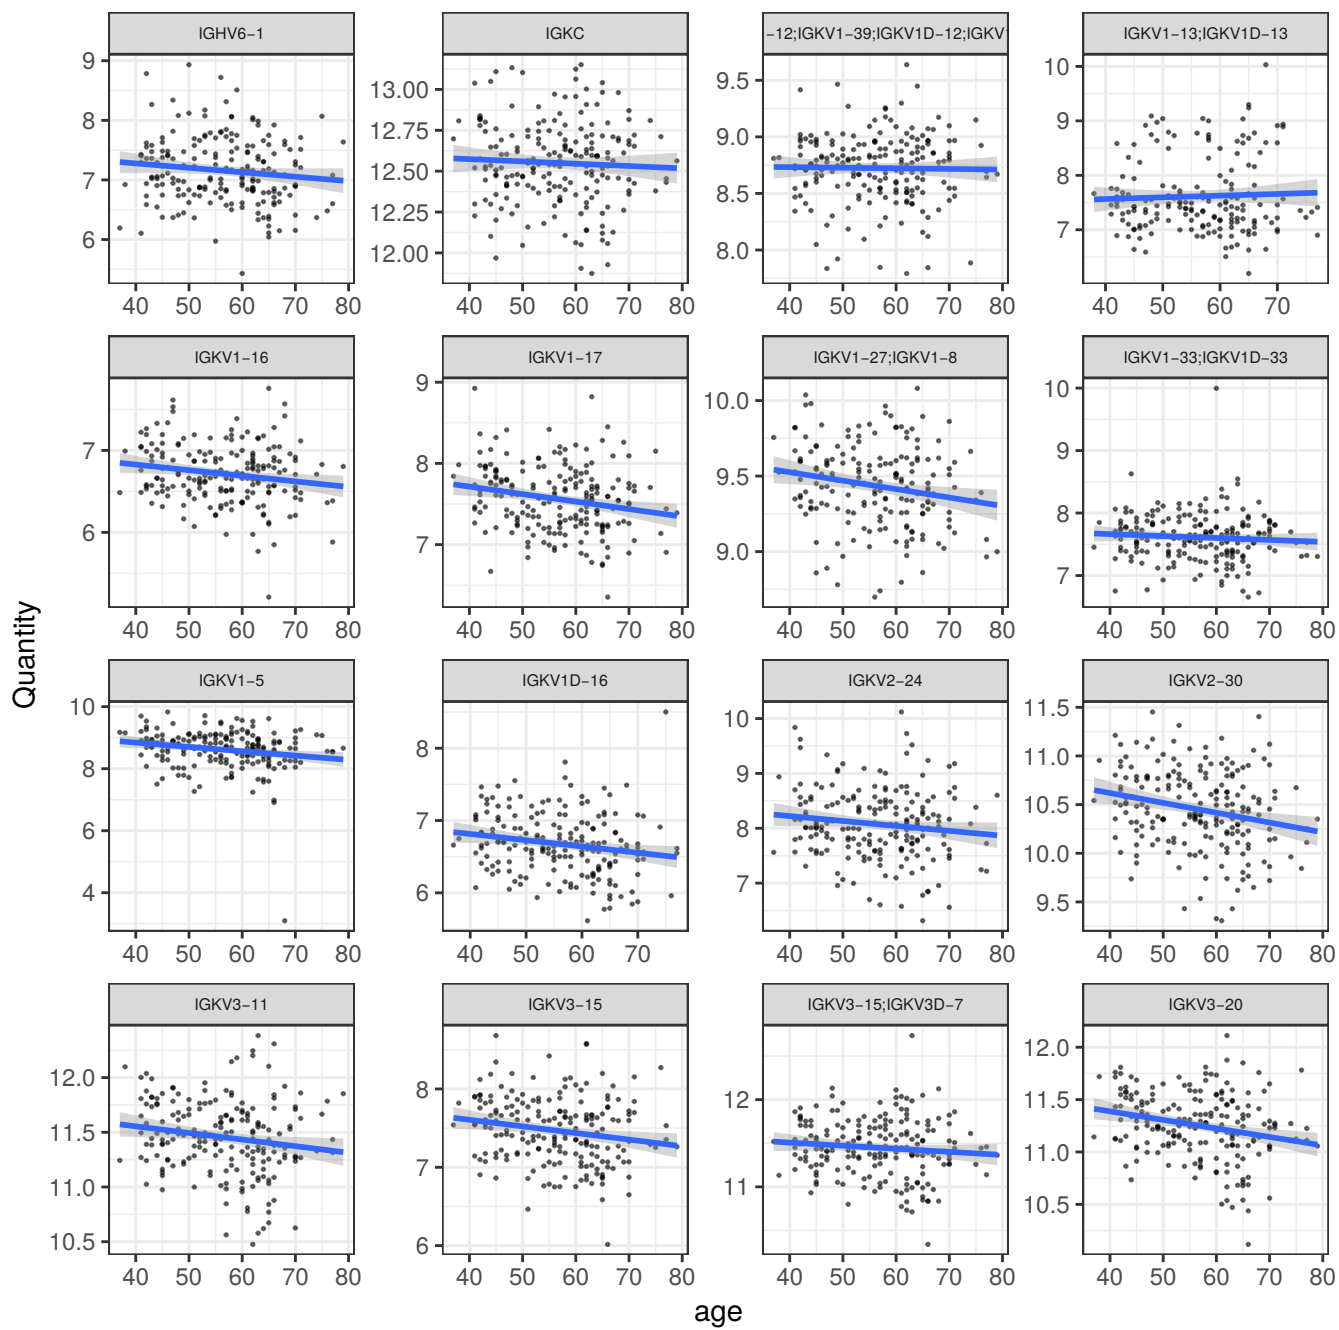

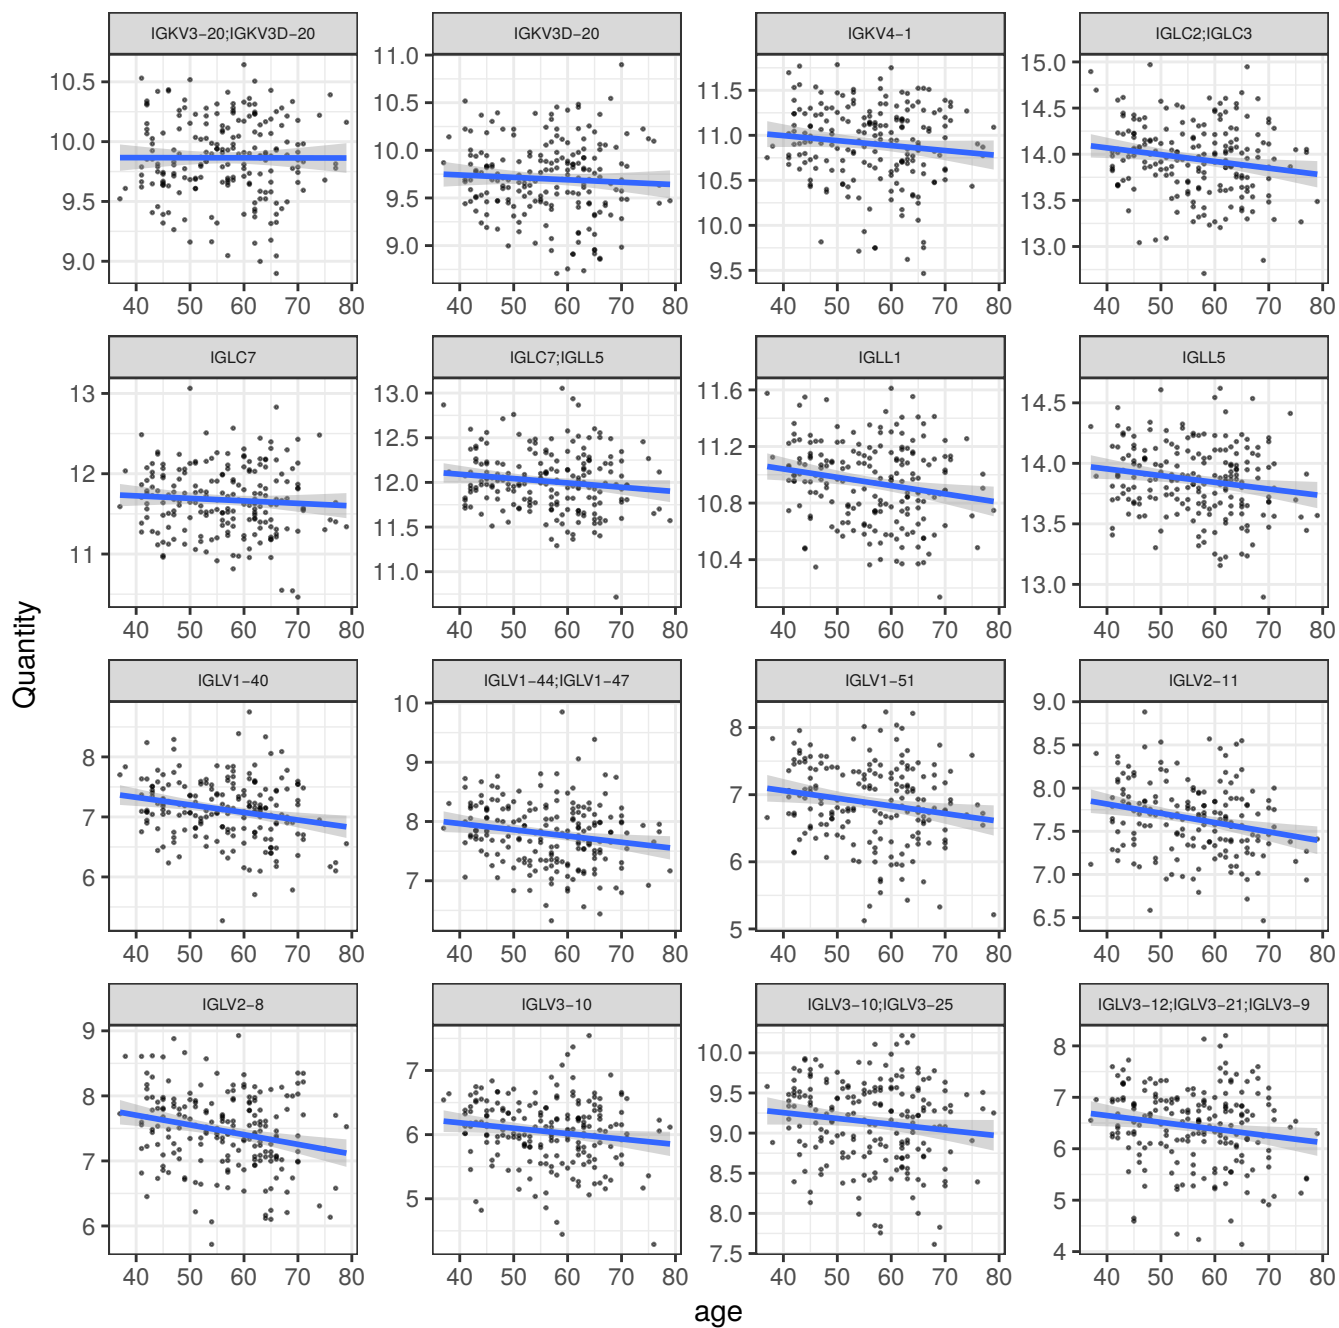

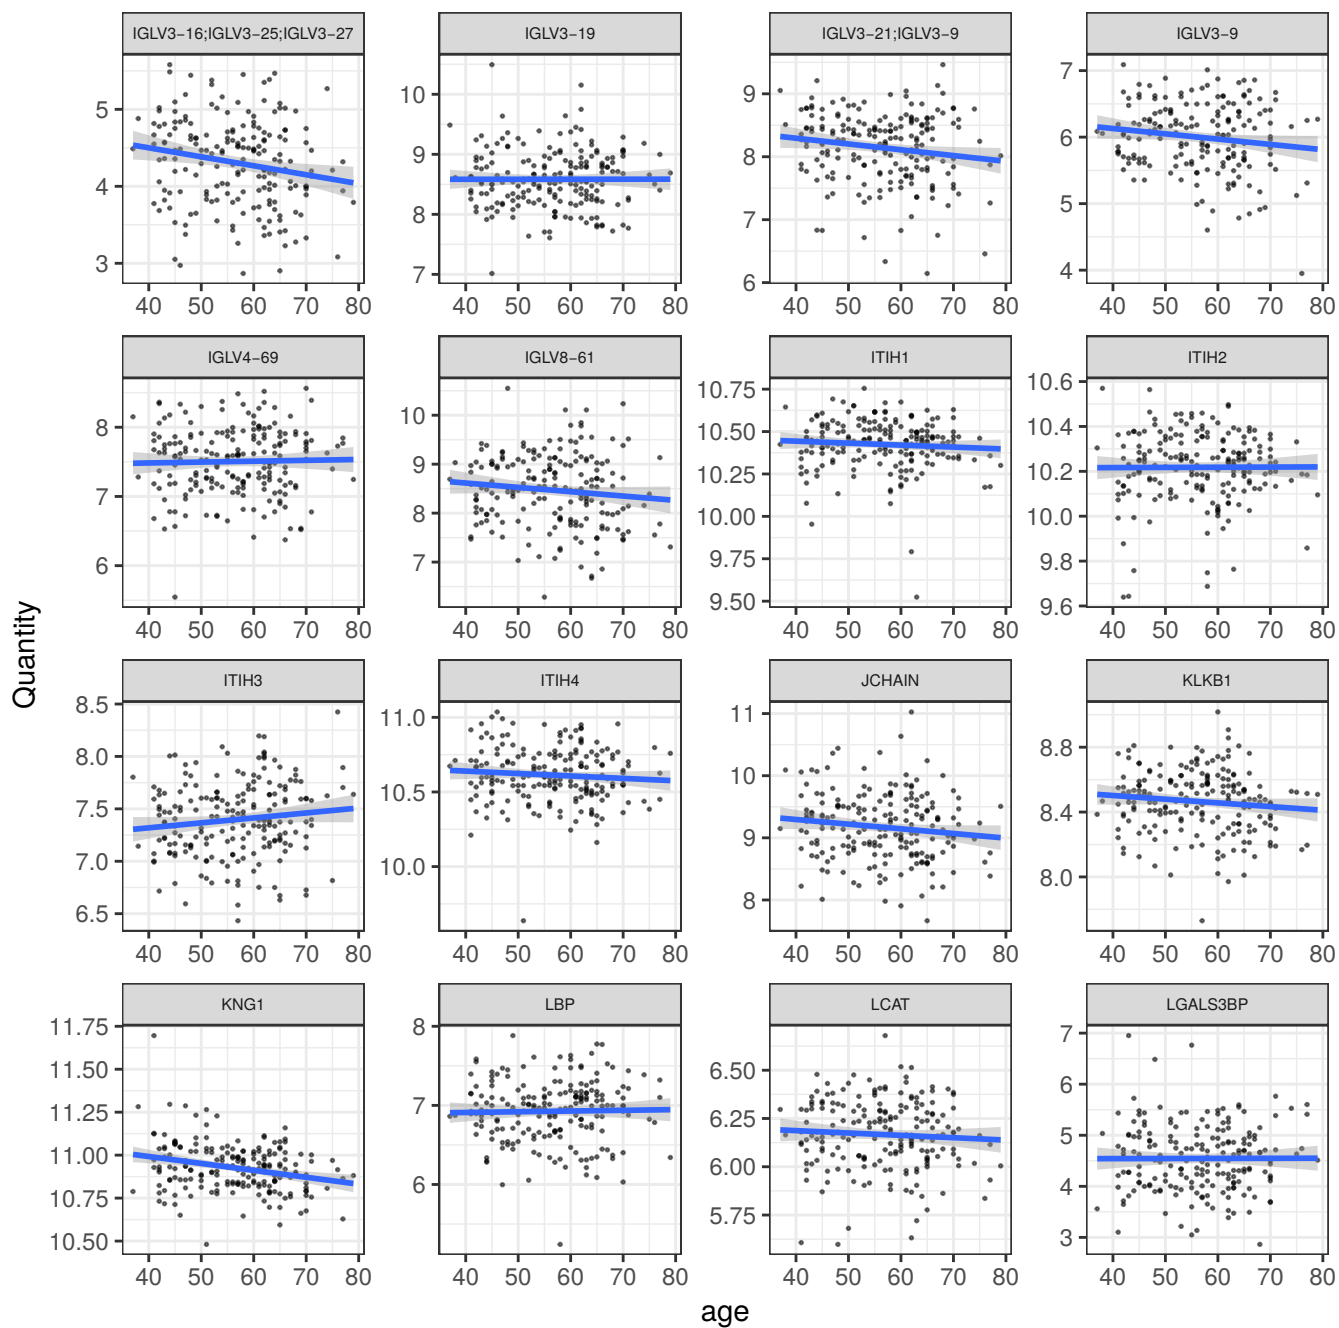

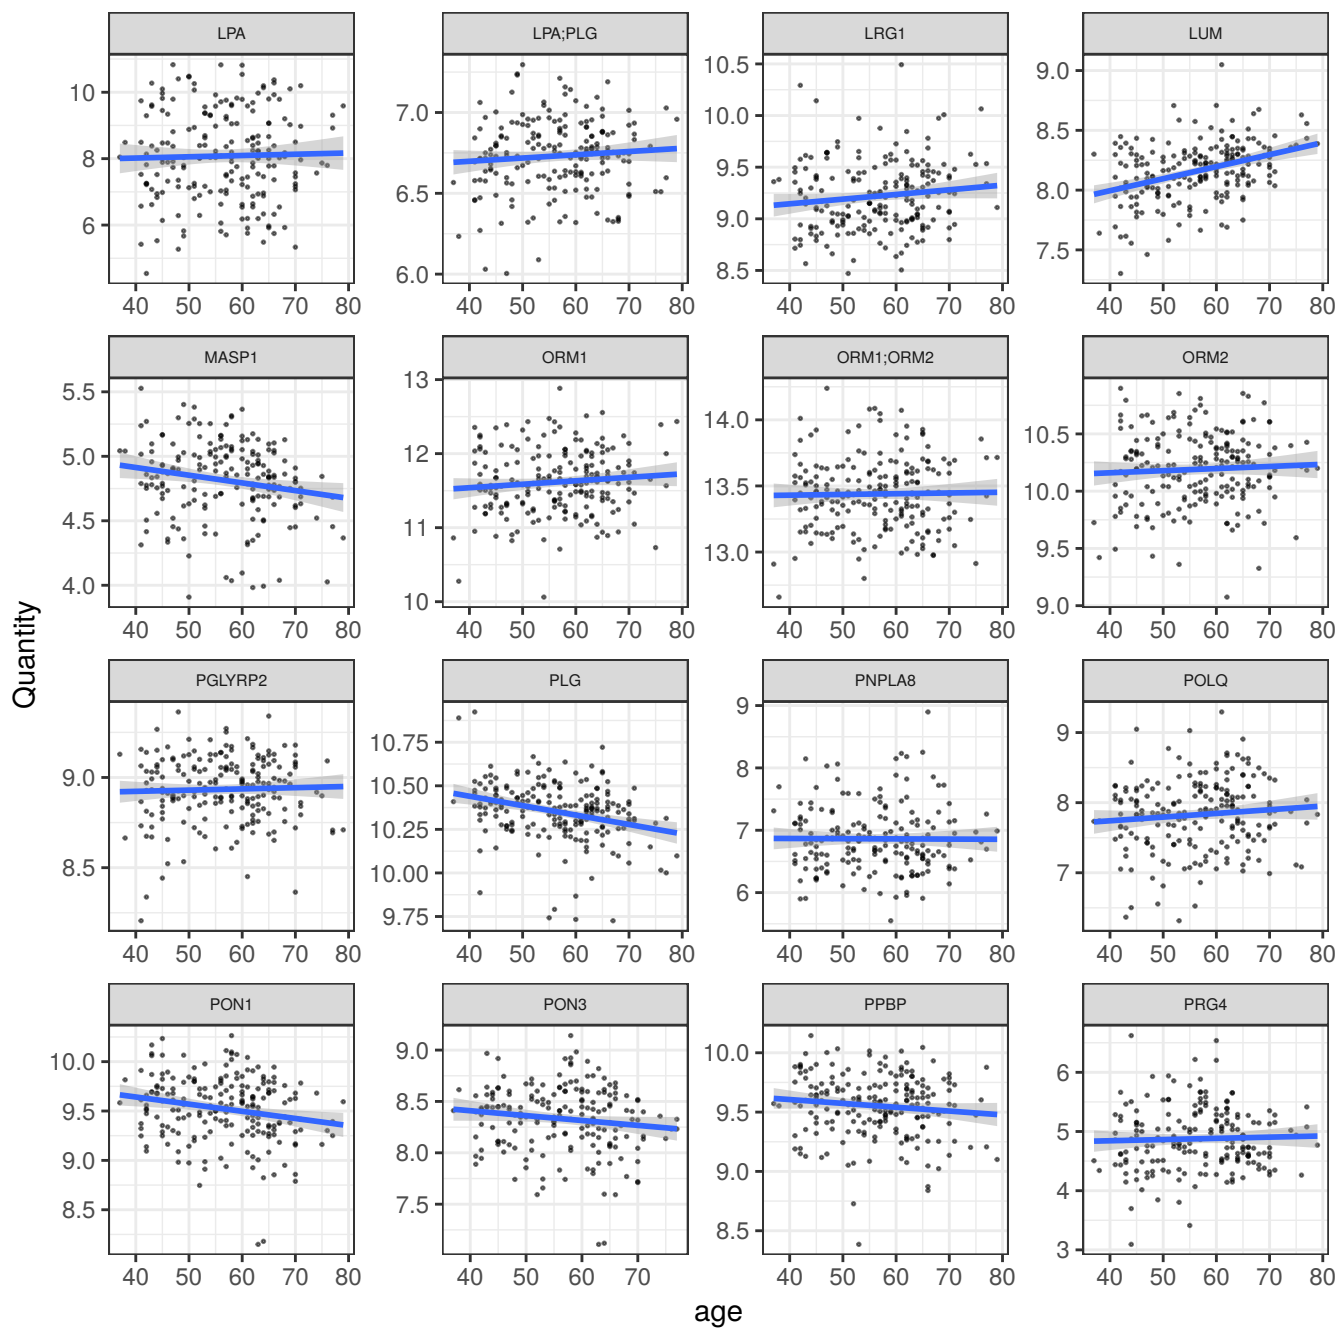

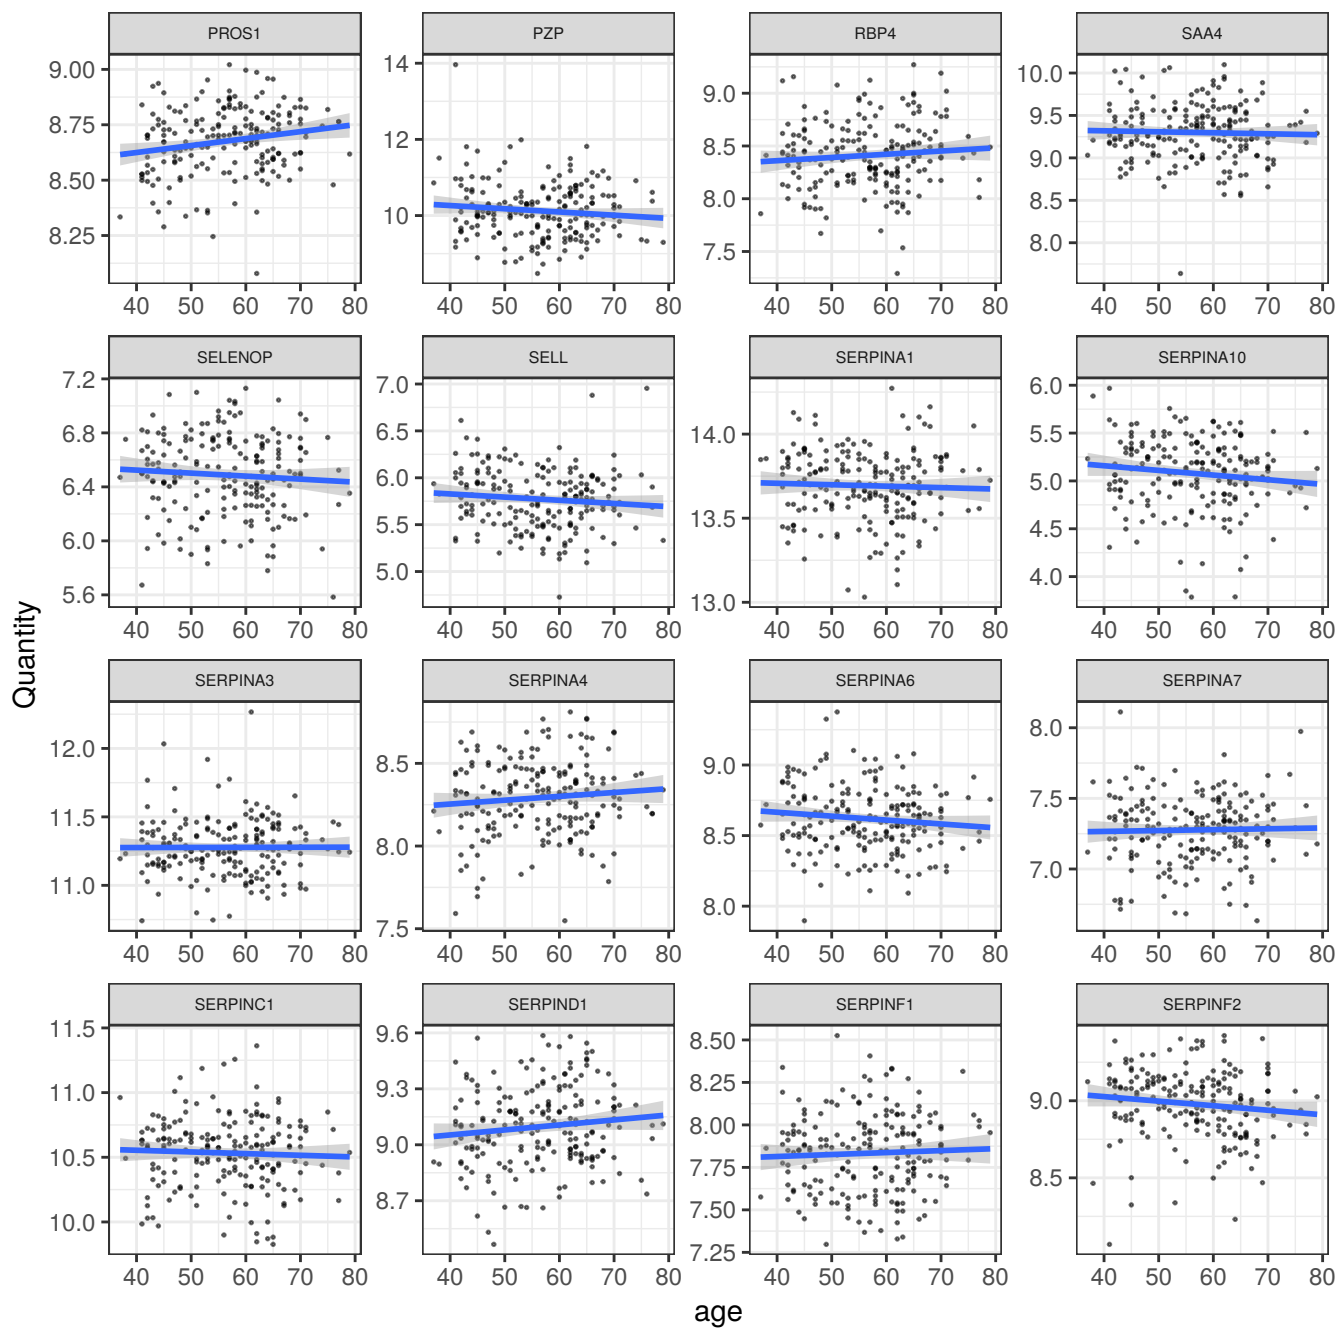



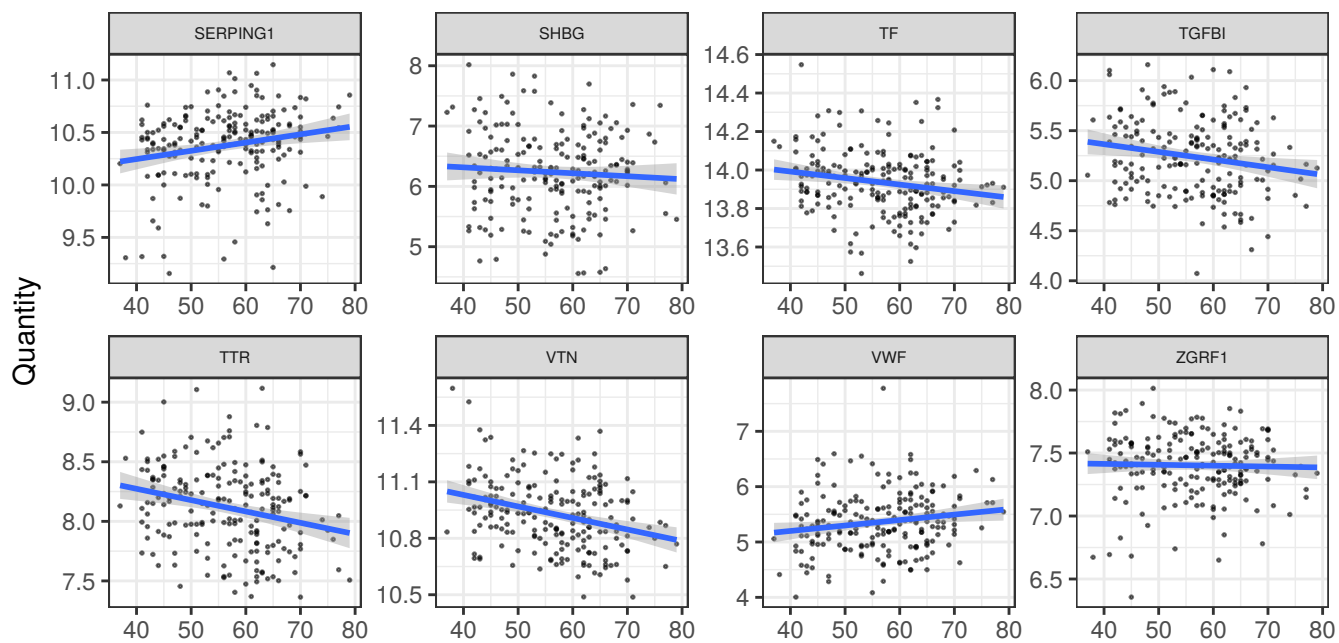

age

## References Supplemental Information

Almawi, W.Y., Al-Shaikh, F.S., Melemedjian, O.K., and Almawi, A.W. (2013). Protein Z, an anticoagulant protein with expanding role in reproductive biology. *Reproduction* 146, R73–R80.

Anas, A., van der Poll, T., and de Vos, A.F. (2010). Role of CD14 in lung inflammation and infection. *Crit. Care* 14, 209.

Asare-Werehene, M., Communal, L., Carmona, E., Le, T., Provencher, D., Mes-Masson, A.-M., and Tsang, B.K. (2019). Pre-operative Circulating Plasma Gelsolin Predicts Residual Disease and Detects Early Stage Ovarian Cancer. *Sci. Rep.* 9, 13924.

Bas, S., Gauthier, B.R., Spenato, U., Stingelin, S., and Gabay, C. (2004). CD14 is an acute-phase protein. *J. Immunol.* 172, 4470–4479.

Bhanumathy, C.D., Tang, Y., Monga, S.P.S., Katuri, V., Cox, J.A., Mishra, B., and Mishra, L. (2002). Itih-4, a serine protease inhibitor regulated in interleukin-6--dependent liver formation: role in liver development and regeneration. *Dev. Dyn.* 223, 59–69.

Cheng, Y., Hu, X., Liu, C., Chen, M., Wang, J., Wang, M., Gao, F., Han, J., Zhang, C., Sun, D., et al. (2017). Gelsolin Inhibits the Inflammatory Process Induced by LPS. *Cell. Physiol. Biochem.* 41, 205–212.

Cox, J., Hein, M.Y., Lubner, C.A., Paron, I., Nagaraj, N., and Mann, M. (2014). Accurate proteome-wide label-free quantification by delayed normalization and maximal peptide ratio extraction, termed MaxLFQ. *Mol. Cell. Proteomics* 13, 2513–2526.

DiNubile, M.J. (2008). Plasma gelsolin as a biomarker of inflammation. *Arthritis Res. Ther.* 10, 124.

Druhan, L.J., Lance, A., Li, S., Price, A.E., Emerson, J.T., Baxter, S.A., Gerber, J.M., and Avalos, B.R. (2017). Leucine Rich  $\alpha$ -2 Glycoprotein: A Novel Neutrophil Granule Protein and Modulator of Myelopoiesis. *PLoS One* 12, e0170261.

Fotakis, P., Kothari, V., Thomas, D.G., Westerterp, M., Molusky, M.M., Altin, E., Abramowicz, S., Wang, N., He, Y., Heinecke, J.W., et al. (2019). Anti-Inflammatory Effects of HDL (High-Density Lipoprotein) in Macrophages Predominate Over Proinflammatory Effects in Atherosclerotic Plaques. *Arterioscler. Thromb. Vasc. Biol.* 39, e253–e272.

Fuor, E.V., and Gafencu, A.V. (2019). Apolipoprotein C1: Its Pleiotropic Effects in Lipid Metabolism and Beyond. *Int. J. Mol. Sci.* 20, 5939.

Gordon, S.M., Hofmann, S., Askew, D.S., and Davidson, W.S. (2011). High density lipoprotein: it's not just about lipid transport anymore. *Trends Endocrinol. Metab.* 22, 9–15.

Hagihara, K., Nishikawa, T., Isobe, T., Song, J., Sugamata, Y., and Yoshizaki, K. (2004). IL-6 plays a critical role in the synergistic induction of human serum amyloid A (SAA) gene when stimulated with proinflammatory cytokines as analyzed with an SAA isoform real-time quantitative RT-PCR assay system. *Biochemical and Biophysical Research Communications* 314, 363–369.

- Hajishengallis, G., Reis, E.S., Mastellos, D.C., Ricklin, D., and Lambris, J.D. (2017). Novel mechanisms and functions of complement. *Nat. Immunol.* 18, 1288–1298.
- Hamm, A., Veeck, J., Bektas, N., Wild, P.J., Hartmann, A., Heindrichs, U., Kristiansen, G., Werbowetski-Ogilvie, T., Del Maestro, R., Knuechel, R., et al. (2008). Frequent expression loss of Inter-alpha-trypsin inhibitor heavy chain (ITIH) genes in multiple human solid tumors: a systematic expression analysis. *BMC Cancer* 8, 25.
- Honda, H., Fujimoto, M., Serada, S., Urushima, H., Mishima, T., Lee, H., Ohkawara, T., Kohno, N., Hattori, N., Yokoyama, A., et al. (2017). Leucine-rich  $\alpha$ -2 glycoprotein promotes lung fibrosis by modulating TGF- $\beta$  signaling in fibroblasts. *Physiological Reports* 5, e13556.
- Hu, W., Yen, Y.-T., Singh, S., Kao, C.-L., and Wu-Hsieh, B.A. (2012). SARS-CoV Regulates Immune Function-Related Gene Expression in Human Monocytic Cells. *Viral Immunology* 25, 277–288.
- Jain, S., Gautam, V., and Naseem, S. (2011). Acute-phase proteins: As diagnostic tool. *J. Pharm. Bioallied Sci.* 3, 118–127.
- Khatri, N., Sagar, A., Peddada, N., Choudhary, V., Chopra, B.S., Garg, V., Garg, R., and Ashish (2014). Plasma gelsolin levels decrease in diabetic state and increase upon treatment with F-actin depolymerizing versions of gelsolin. *J Diabetes Res* 2014, 152075.
- Kong, Z., Zhou, C., Chen, L., Ren, A., Zhang, D., Basang, Z., Tan, Z., Kang, J., and Li, B. (2019). Multi-Omics Analysis Reveals Up-Regulation of APR Signaling, LXR/RXR and FXR/RXR Activation Pathways in Holstein Dairy Cows Exposed to High-Altitude Hypoxia. *Animals (Basel)* 9, 406.
- Kumaraswamy, S.B., Linder, A., Åkesson, P., and Dahlbäck, B. (2012). Decreased plasma concentrations of apolipoprotein M in sepsis and systemic inflammatory response syndromes. *Crit. Care* 16, R60.
- Lee, P.-S., Waxman, A.B., Cotich, K.L., Chung, S.W., Perrella, M.A., and Stossel, T.P. (2007). Plasma gelsolin is a marker and therapeutic agent in animal sepsis. *Crit. Care Med.* 35, 849–855.
- Li, G.H., Arora, P.D., Chen, Y., McCulloch, C.A., and Liu, P. (2012). Multifunctional roles of gelsolin in health and diseases. *Med. Res. Rev.* 32, 999–1025.
- Li, S., Lee, C., Hsu, C., Huang, H., and Su, Y. (2020). IL-6 induces haptoglobin expression through activating STAT3 in human head and neck cancer. *J. Oral Pathol. Med.* 49, 49–54.
- Macpherson, M.E., Halvorsen, B., Yndestad, A., Ueland, T., Mollnes, T.E., Berge, R.K., Rashidi, A., Otterdal, K., Gregersen, I., Kong, X.Y., et al. (2019). Impaired HDL Function Amplifies Systemic Inflammation in Common Variable Immunodeficiency. *Sci. Rep.* 9, 9427.
- Naka, T., and Fujimoto, M. (2018). LRG is a novel inflammatory marker clinically useful for the evaluation of disease activity in rheumatoid arthritis and inflammatory bowel disease. *Immunol Med* 41, 62–67.

Qin, C., Zhou, L., Hu, Z., Zhang, S., Yang, S., Tao, Y., Xie, C., Ma, K., Shang, K., Wang, W., et al. (2020). Dysregulation of immune response in patients with COVID-19 in Wuhan, China. *Clin. Infect. Dis.* ciaa248.

Ricklin, D., Hajishengallis, G., Yang, K., and Lambris, J.D. (2010). Complement: a key system for immune surveillance and homeostasis. *Nat. Immunol.* *11*, 785–797.

Ricklin, D., Reis, E.S., and Lambris, J.D. (2016). Complement in disease: a defence system turning offensive. *Nat. Rev. Nephrol.* *12*, 383–401.

Ruan, Q., Yang, K., Wang, W., Jiang, L., and Song, J. (2020). Correction to: Clinical predictors of mortality due to COVID-19 based on an analysis of data of 150 patients from Wuhan, China. *Intensive Care Med.* 1–3.

Sack, G.H. (2018). Serum amyloid A – a review. *Molecular Medicine* *24*, 1–27.

Shi, H., Han, X., Jiang, N., Cao, Y., Alwalid, O., Gu, J., Fan, Y., and Zheng, C. (2020). Radiological findings from 81 patients with COVID-19 pneumonia in Wuhan, China: a descriptive study. *Lancet Infect. Dis.* *20*, 425–434.

Shirai, R., Hirano, F., Ohkura, N., Ikeda, K., and Inoue, S. (2009). Up-regulation of the expression of leucine-rich alpha(2)-glycoprotein in hepatocytes by the mediators of acute-phase response. *Biochem. Biophys. Res. Commun.* *382*, 776–779.

Shive, C.L., Jiang, W., Anthony, D.D., and Lederman, M.M. (2015). Soluble CD14 is a nonspecific marker of monocyte activation. *AIDS* *29*, 1263–1265.

Silverman, A.M., Nakata, R., Shimada, H., and Sposto, R. (2012). A Galectin-3–Dependent Pathway Upregulates Interleukin-6 in the Microenvironment of Human Neuroblastoma. *Cancer Res.* *72*, 2228–2238.

Sirniö, P., Väyrynen, J.P., Klintrup, K., Mäkelä, J., Mäkinen, M.J., Karttunen, T.J., and Tuomisto, A. (2017). Decreased serum apolipoprotein A1 levels are associated with poor survival and systemic inflammatory response in colorectal cancer. *Sci. Rep.* *7*, 5374.

Soeters, P.B., Wolfe, R.R., and Shenkin, A. (2019). Hypoalbuminemia: Pathogenesis and Clinical Significance. *JPEN J. Parenter. Enteral Nutr.* *43*, 181–193.

Stock, A.-M., Klee, F., Edlund, K., Grinberg, M., Hammad, S., Marchan, R., Cadenas, C., Niggemann, B., Zänker, K.S., Rahnenführer, J., et al. (2015). Gelsolin Is Associated with Longer Metastasis-free Survival and Reduced Cell Migration in Estrogen Receptor-positive Breast Cancer. *Anticancer Res.* *35*, 5277–5285.

Tani, S., Nagao, K., and Hirayama, A. (2016). Association of systemic inflammation with the serum apolipoprotein A-1 level: A cross-sectional pilot study. *J. Cardiol.* *68*, 168–177.

Wang, X., Abraham, S., McKenzie, J.A.G., Jeffs, N., Swire, M., Tripathi, V.B., Luhmann, U.F.O., Lange, C.A.K., Zhai, Z., Arthur, H.M., et al. (2013). LRG1 promotes angiogenesis by modulating endothelial TGF- $\beta$  signalling. *Nature* *499*, 306–311.

White, R., Giordano, S., and Datta, G. (2017). Role of HDL-Associated Proteins and Lipids in

the Regulation of Inflammation. In *Advances in Lipoprotein Research*, T. Isbir, ed. (IntechOpen), p. 53.

Wittmann, J., Dieckow, J., Schröder, H., Hampel, U., Garreis, F., Jacobi, C., Milczarek, A., Hsieh, K.L., Pulli, B., Chen, J.W., et al. (2018). Plasma gelsolin promotes re-epithelialization. *Sci. Rep.* *8*, 13140.

World Health Organisation (2020). WHO R&D Blueprint novel Coronavirus COVID-19 Therapeutic Trial Synopsis.

Xu, G., Xia, Z., Deng, F., Liu, L., Wang, Q., Yu, Y., Wang, F., Zhu, C., Liu, W., Cheng, Z., et al. (2019). Inducible LGALS3BP/90K activates antiviral innate immune responses by targeting TRAF6 and TRAF3 complex. *PLoS Pathog.* *15*, e1008002.

Zhou, F., Yu, T., Du, R., Fan, G., Liu, Y., Liu, Z., Xiang, J., Wang, Y., Song, B., Gu, X., et al. (2020). Clinical course and risk factors for mortality of adult inpatients with COVID-19 in Wuhan, China: a retrospective cohort study. *Lancet* *395*, 1054–1062.
